# Supplementary material for: Organocatalytic asymmetric formal [3 + 2] cycloaddition reaction of isocyanoacetates with saccharin-derived 1-azadienes
Source: Royal Society of Chemistry journal article supplement (doi:10.1039/d1ob00115a), 2021-01-01

Supporting Information

## Organocatalytic Asymmetric Formal [3+2] Cycloaddition Reaction of Isocyanoacetates with Saccharin-Derived 1-Azadienes

Li Chang,<sup>†</sup> Guang-Yu Zhu,<sup>†</sup> Ting Yang,<sup>†</sup> Xiao-Li Zhao,<sup>‡</sup> Min Shi<sup>†,§</sup> and Mei-Xin Zhao<sup>\*,†</sup>

<sup>†</sup> Key Laboratory for Advanced Materials and Institute of Fine Chemicals, School of Chemistry & Molecular Engineering, East China University of Science and Technology, 130 Mei Long Road, Shanghai, 200237, P. R. China

E-mail: mxzhao@ecust.edu.cn

<sup>‡</sup> Shanghai Key Laboratory of Green Chemistry and Chemical Processes, Department of Chemistry, East China Normal University, 3663 North Zhongshan Road, Shanghai 200062, China

<sup>§</sup> State Key Laboratory of Organometallic Chemistry, Shanghai Institute of Organic Chemistry, Chinese Academy of Sciences, 354 Fenglin Road, Shanghai 200032, P. R. China

### Table of Contents

|                                                                                                                                                                         |     |
|-------------------------------------------------------------------------------------------------------------------------------------------------------------------------|-----|
| 1. Optimization reaction conditions of catalytic asymmetric formal [3+2] cycloaddition reaction of isocyanoacetate <b>1a</b> with chalcone-derived tosylimine <b>5a</b> | S2  |
| 2. X-Ray crystal data of compound <b>4d</b>                                                                                                                             | S3  |
| 3. Copies of HPLC analysis spectra of compounds <b>4</b>                                                                                                                | S4  |
| 4. Copies of NMR spectra for the compounds <b>4</b>                                                                                                                     | S29 |

# 1. Optimization Reaction Conditions of Catalytic Asymmetric Formal [3+2] Cycloaddition Reaction of Isocyanoacetate **1a** with Chalcone-derived Tosylimine **5a**

Table S1 Catalysts screening and optimization reaction conditions<sup>[a]</sup>

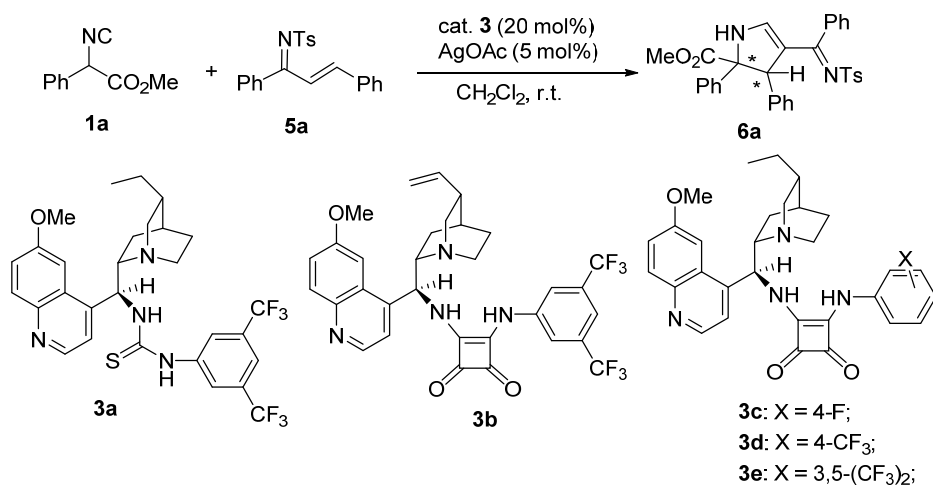

| Entry             | Catalyst  | <i>t</i> (h) | <i>T</i> [°C] | Yield (%) | <i>d</i> <i>r</i> <sup>[b]</sup> | <i>ee</i> (%) <sup>[c]</sup> |
|-------------------|-----------|--------------|---------------|-----------|----------------------------------|------------------------------|
| 1                 | <b>3a</b> | 0.5          | r.t.          | 99        | 0.9:1                            | 25 (4)                       |
| 2                 | <b>3b</b> | 0.5          | r.t.          | 99        | 2.6:1                            | 63 (36)                      |
| 3                 | <b>3c</b> | 0.5          | r.t.          | 99        | 2.1:1                            | 39 (9)                       |
| 4                 | <b>3d</b> | 0.5          | r.t.          | 99        | 2.1:1                            | 42 (8)                       |
| 5                 | <b>3e</b> | 0.5          | r.t.          | 99        | 1.8:1                            | 65 (37)                      |
| 6                 | <b>3e</b> | 0.5          | 0             | 99        | 2.2:1                            | 55 (24)                      |
| 7                 | <b>3e</b> | 0.5          | 40            | 99        | 2.6:1                            | 60 (29)                      |
| 8 <sup>[d]</sup>  | <b>3e</b> | 0.5          | r.t.          | 99        | 3.1:1                            | 67 (28)                      |
| 9 <sup>[e]</sup>  | <b>3e</b> | 2            | r.t.          | 99        | 2.1:1                            | 58 (41)                      |
| 10 <sup>[f]</sup> | <b>3e</b> | 2            | r.t.          | 99        | 2.2:1                            | 80 (52)                      |
| 11 <sup>[f]</sup> | <b>3e</b> | 2            | <b>10</b>     | <b>99</b> | <b>4.2:1</b>                     | <b>81 (35)</b>               |
| 12 <sup>[f]</sup> | <b>3e</b> | 2            | 0             | 99        | 2.1:1                            | 74 (48)                      |
| 13 <sup>[f]</sup> | <b>3e</b> | 2            | -20           | 99        | 3.0:1                            | 59 (43)                      |

[a] Unless otherwise noted, all of reactions were carried out with isocyanoacetate **1a** (0.12 mmol),  $\alpha$ ,  $\beta$ -unsaturated imine **5a** (0.10 mmol), AgOAc (5 mol%) and catalyst **3** (0.02 mmol) in 2.0 mL of CH<sub>2</sub>Cl<sub>2</sub>. The data in parentheses are the *ee* value for minor isomer. [b] Determined by <sup>1</sup>H NMR analysis for the pure product, the data in parenthesis was the *ee* for minor isomer. [c] Enantiomeric excesses were determined by chiral HPLC analysis. [d] 30 mg of 4Å molecular sieves was added. [e] **1a** was added dropwise. [f] **5a** was added dropwise.

## 2. X-Ray Crystal Data of Compound 4d

Table S2. Crystal data and structure refinement for **4d** (CCDC 2010595).

|                                   |                                                                                                     |
|-----------------------------------|-----------------------------------------------------------------------------------------------------|
| Empirical formula                 | C <sub>25</sub> H <sub>19</sub> BrN <sub>2</sub> O <sub>4</sub> S                                   |
| Formula weight                    | 523.39                                                                                              |
| Temperature                       | 293(2) K                                                                                            |
| Wavelength                        | 1.54184 Å                                                                                           |
| Crystal system                    | orthorhombic                                                                                        |
| Space group                       | P 21 21 21                                                                                          |
| Unit cell dimensions              | a = 6.73540(10) Å      α = 90°.<br>b = 18.2897(2) Å      β = 90°.<br>c = 19.0257(2) Å      γ = 90°. |
| Volume                            | 2343.75(5) Å <sup>3</sup>                                                                           |
| Z                                 | 4                                                                                                   |
| Density (calculated)              | 1.483 Mg/m <sup>3</sup>                                                                             |
| Absorption coefficient            | 3.514 mm <sup>-1</sup>                                                                              |
| F (000)                           | 1064.0                                                                                              |
| Crystal size                      | 0.43 x 0.37 x 0.35 mm <sup>3</sup>                                                                  |
| Theta range for data collection   | 4.648 to 67.073°                                                                                    |
| Index ranges                      | -6 ≤ h ≤ 8, -16 ≤ k ≤ 21, -22 ≤ l ≤ 22                                                              |
| Reflections collected             | 23450                                                                                               |
| Independent reflections           | 4171 [R (int) = 0.0719]                                                                             |
| Data / restraints / parameters    | 4171 / 0 / 300                                                                                      |
| Goodness-of-fit on F <sup>2</sup> | 1.036                                                                                               |
| Final R indices [I > 2σ(I)]       | R1 = 0.0488, wR2 = 0.1277                                                                           |
| R indices (all data)              | R1 = 0.0499, wR2 = 0.1286                                                                           |
| Largest diff. peak and hole       | 1.077 and -0.832 e.Å <sup>-3</sup>                                                                  |

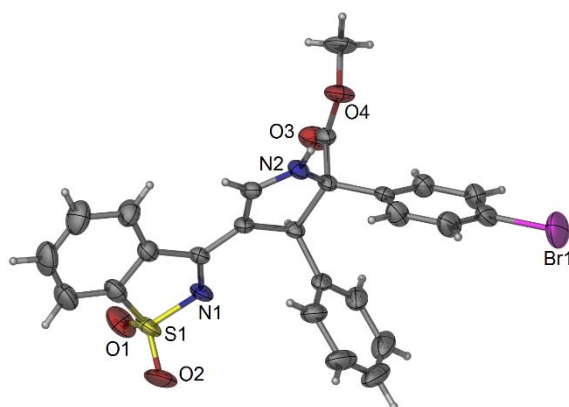

**Figure S1.** ORTEP plot of the X-ray crystal structure of **4d**. Displacement ellipsoids are drawn at the 50% probability level.

### 3. Copies of HPLC Analysis Spectra of Compounds 4

#### 4a (Table 3, entry 1)

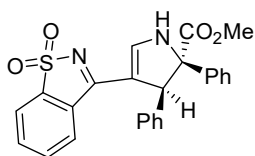

#### Racemic

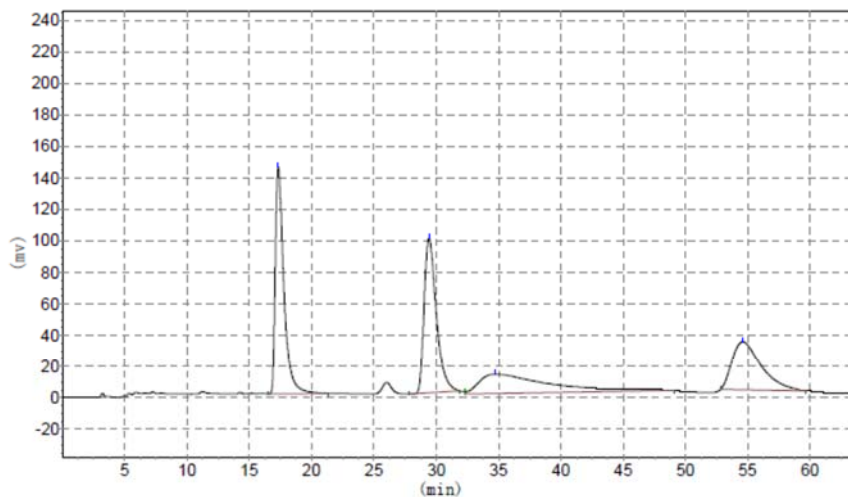

| Peak  | Retention time | Height     | Area         | Area %   |
|-------|----------------|------------|--------------|----------|
| 1     | 17.320         | 144459.594 | 6955945.000  | 29.6249  |
| 2     | 29.422         | 98839.133  | 6728073.500  | 28.6544  |
| 3     | 34.737         | 12470.685  | 4815525.000  | 20.5090  |
| 4     | 54.575         | 30926.441  | 4980514.500  | 21.2117  |
| Total |                | 286695.853 | 23480058.000 | 100.0000 |

#### Chiral

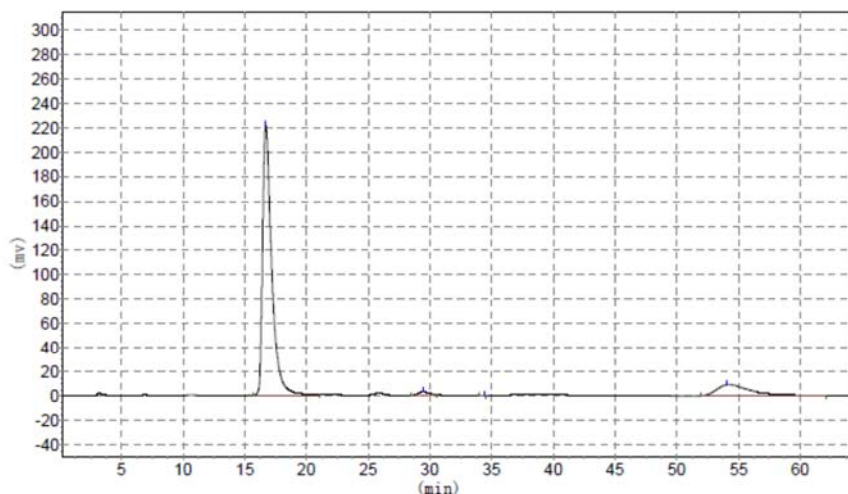

| Peak  | Retention time | Height     | Area         | Area%    |
|-------|----------------|------------|--------------|----------|
| 1     | 16.708         | 222010.891 | 11511507.000 | 85.3617  |
| 2     | 29.460         | 3167.785   | 200083.656   | 1.4837   |
| 3     | 34.403         | 39.850     | 608.900      | 0.0045   |
| 4     | 54.102         | 9107.561   | 1773365.125  | 13.1501  |
| Total |                | 234326.086 | 13485564.681 | 100.0000 |

#### 4b (Table 3, entry 2)

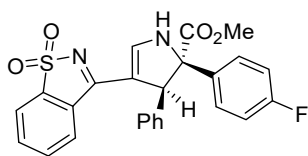

#### Racemic

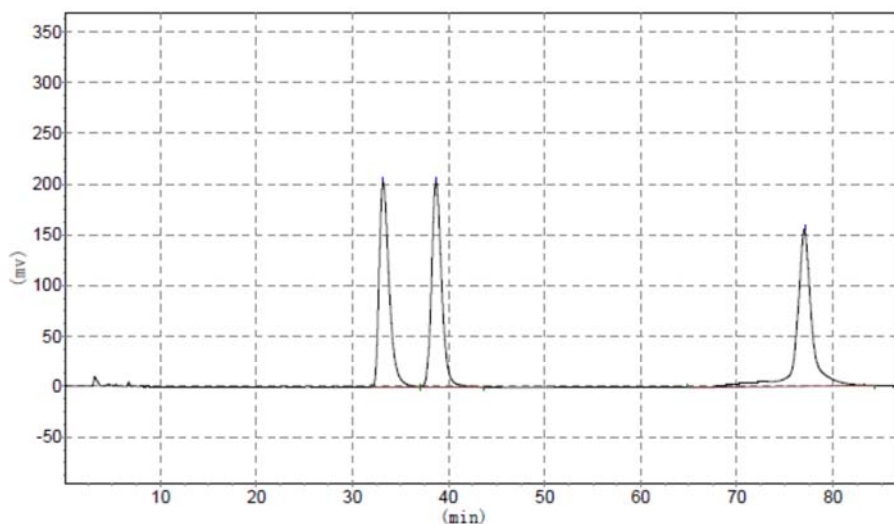

| Peak         | Retention time | Height     | Area         | Area%    |
|--------------|----------------|------------|--------------|----------|
| 1            | 33.198         | 203557.453 | 14832495.000 | 31.0386  |
| 2            | 38.698         | 204110.969 | 14984826.000 | 31.3573  |
| 3            | 77.032         | 156235.672 | 17969982.000 | 37.6041  |
| <b>Total</b> |                | 563904.094 | 47787303.000 | 100.0000 |

#### Chiral

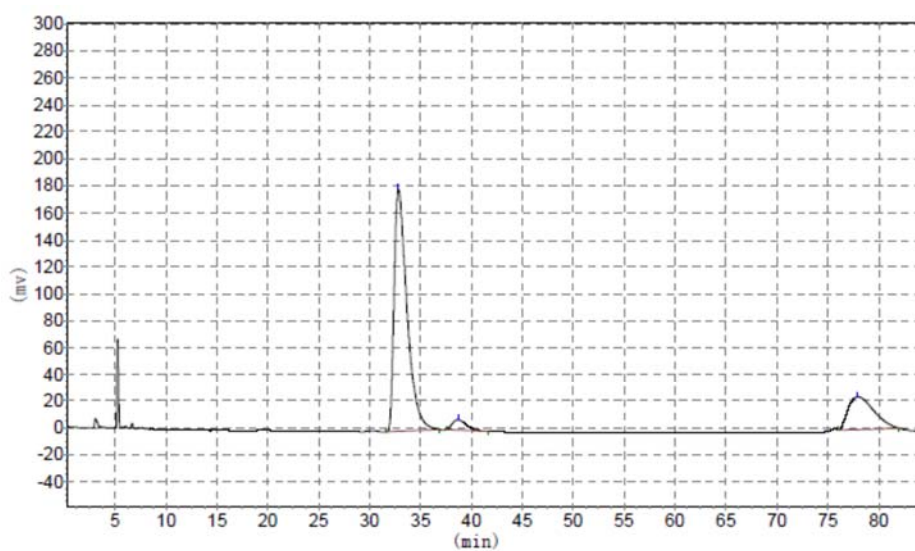

| Peak         | Retention time | Height     | Area         | Area%    |
|--------------|----------------|------------|--------------|----------|
| 1            | 32.840         | 180023.406 | 15921050.000 | 76.1714  |
| 2            | 38.693         | 7756.487   | 734860.813   | 3.5158   |
| 3            | 77.973         | 24342.518  | 4245689.500  | 20.3127  |
| <b>Total</b> |                | 212122.411 | 20901600.313 | 100.0000 |

#### 4c (Table 3, entry 3)

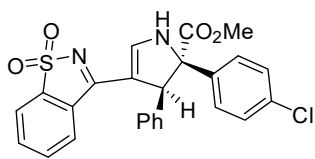

#### Racemic

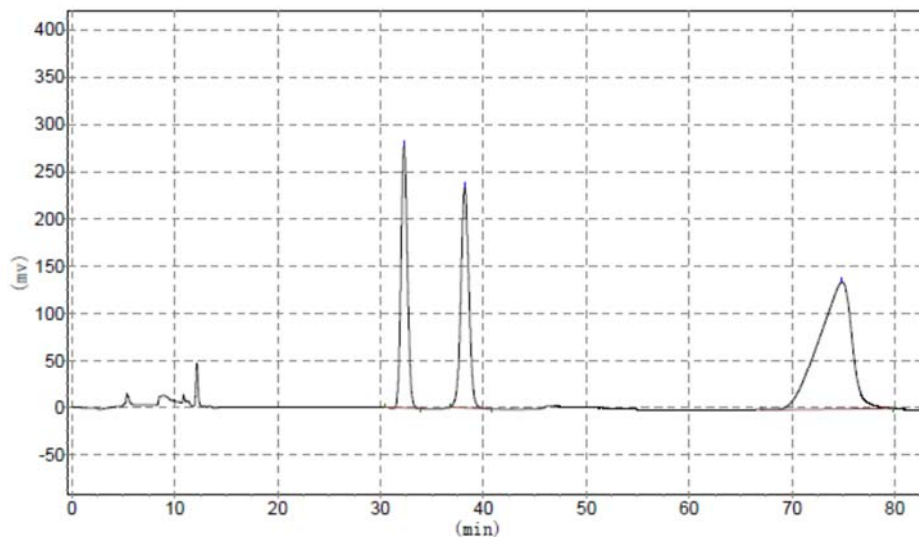

| Peak         | Retention time | Height            | Area                | Area%           |
|--------------|----------------|-------------------|---------------------|-----------------|
| 1            | 32.283         | 277216.094        | 12126523.000        | 22.0311         |
| 2            | 38.180         | 233887.828        | 12719610.000        | 23.1086         |
| 3            | 74.867         | 135616.953        | 30196638.000        | 54.8603         |
| <b>Total</b> |                | <b>646720.875</b> | <b>55042771.000</b> | <b>100.0000</b> |

#### Chiral

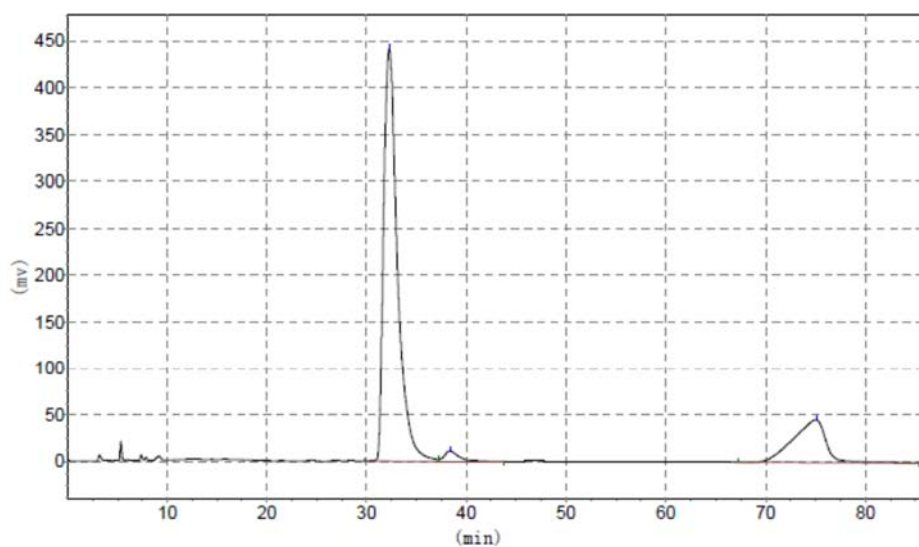

| Peak         | Retention time | Height            | Area                | Area%           |
|--------------|----------------|-------------------|---------------------|-----------------|
| 1            | 32.265         | 441384.375        | 42698292.000        | 78.3683         |
| 2            | 38.332         | 11481.805         | 1318577.375         | 2.4201          |
| 3            | 75.065         | 45657.258         | 10467236.000        | 19.2115         |
| <b>Total</b> |                | <b>498523.438</b> | <b>54484105.375</b> | <b>100.0000</b> |

#### 4d (Table 3, entry 4)

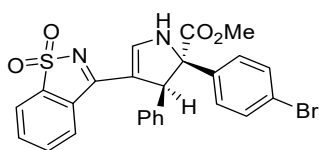

#### Racemic

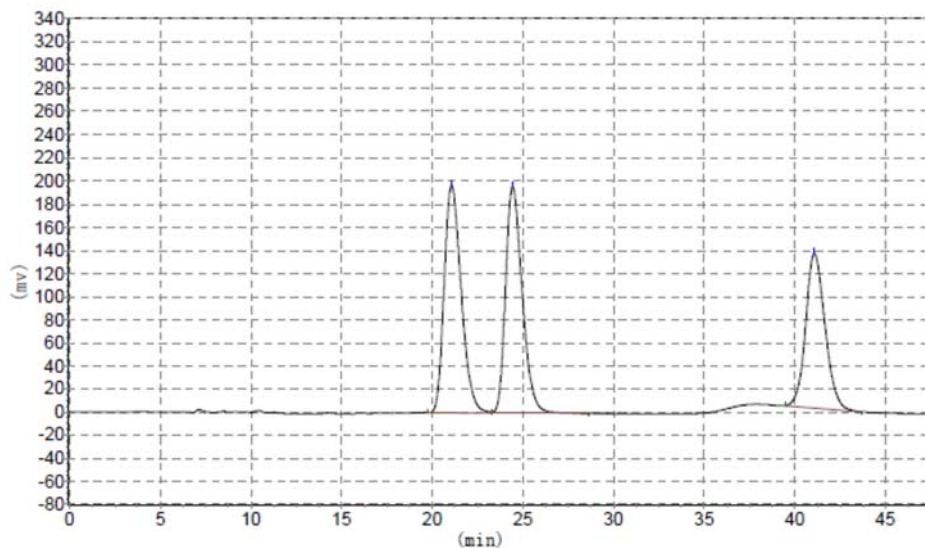

| Peak         | Retention time | Height            | Area                | Area%           |
|--------------|----------------|-------------------|---------------------|-----------------|
| 1            | 21.068         | 196950.250        | 12906293.000        | 36.4017         |
| 2            | 24.440         | 195870.234        | 12527485.000        | 35.3333         |
| 3            | 41.077         | 134231.891        | 10021445.000        | 28.2651         |
| <b>Total</b> |                | <b>527052.375</b> | <b>35455223.000</b> | <b>100.0000</b> |

#### Chiral

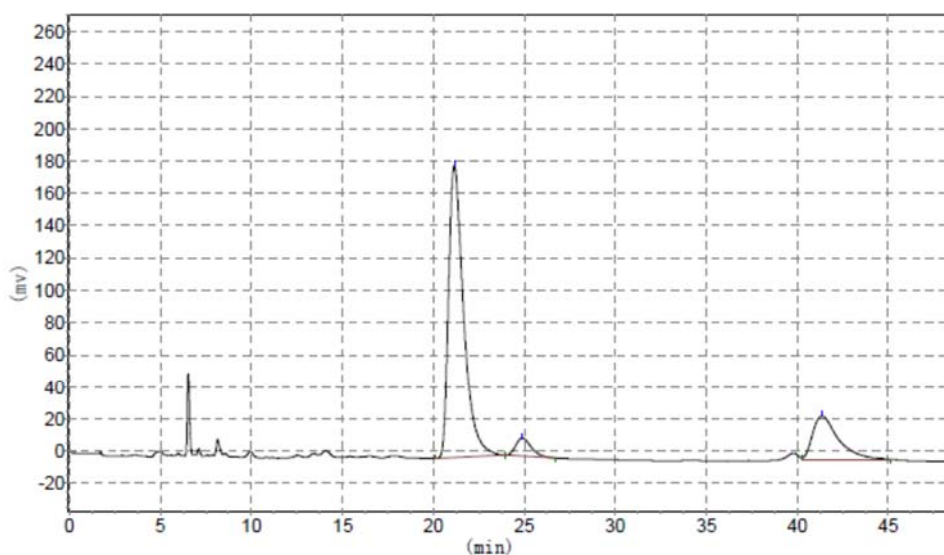

| Peak         | Retention time | Height            | Area                | Area%           |
|--------------|----------------|-------------------|---------------------|-----------------|
| 1            | 21.143         | 181092.813        | 10386256.000        | 75.7206         |
| 2            | 24.880         | 11198.487         | 670833.688          | 4.8907          |
| 3            | 41.358         | 26753.791         | 2659457.750         | 19.3887         |
| <b>Total</b> |                | <b>219045.091</b> | <b>13716547.438</b> | <b>100.0000</b> |

#### 4e (Table 3, entry 5)

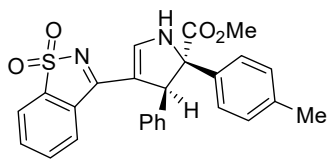

#### Racemic

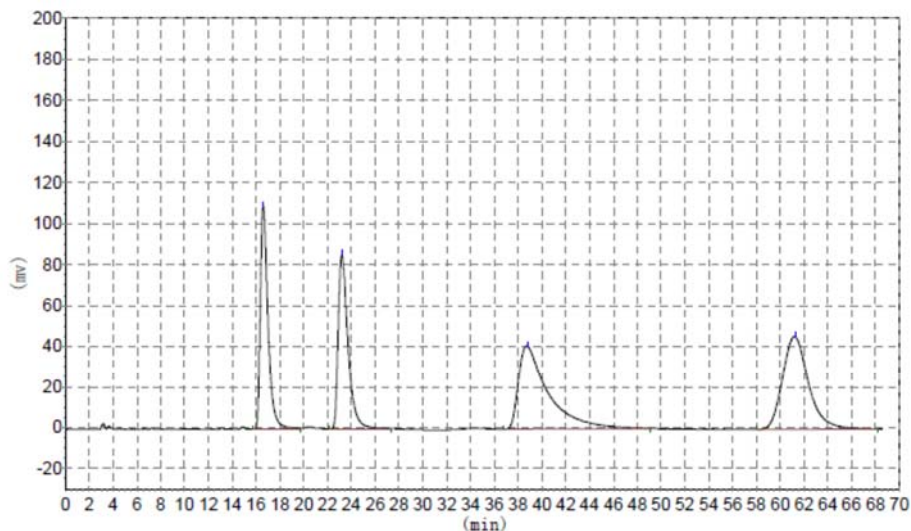

| Peak  | Retention time | Height     | Area         | Area%   |
|-------|----------------|------------|--------------|---------|
| 1     | 16.615         | 109378.844 | 4955883.500  | 20.2611 |
| 2     | 23.215         | 85759.695  | 5074097.500  | 20.7444 |
| 3     | 38.782         | 41492.289  | 7435519.000  | 30.3985 |
| 4     | 61.248         | 45931.684  | 6994635.000  | 28.5961 |
| Total |                | 282562.512 | 24460135.000 | 100.000 |

#### Chiral

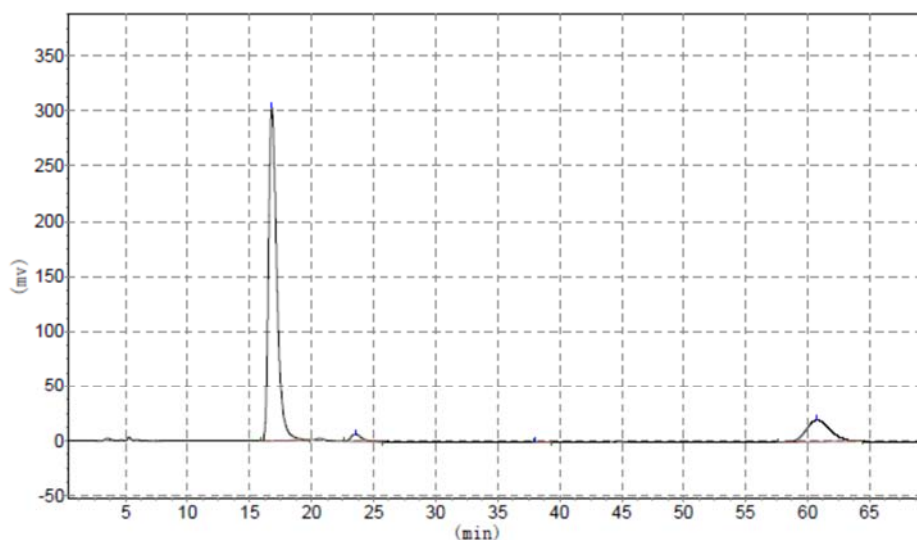

| Peak  | Retention time | Height     | Area         | Area%    |
|-------|----------------|------------|--------------|----------|
| 1     | 16.802         | 302620.000 | 13695628.000 | 81.7622  |
| 2     | 23.530         | 6553.463   | 376609.250   | 2.2483   |
| 3     | 38.098         | 50.934     | 1762.601     | 0.0105   |
| 4     | 60.770         | 19639.793  | 2676559.000  | 15.9789  |
| Total |                | 328864.190 | 16750558.851 | 100.0000 |



**4f (Table 3, entry 6)**

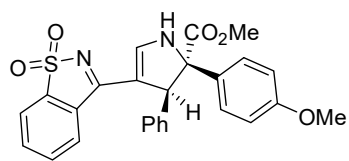

**Racemic**

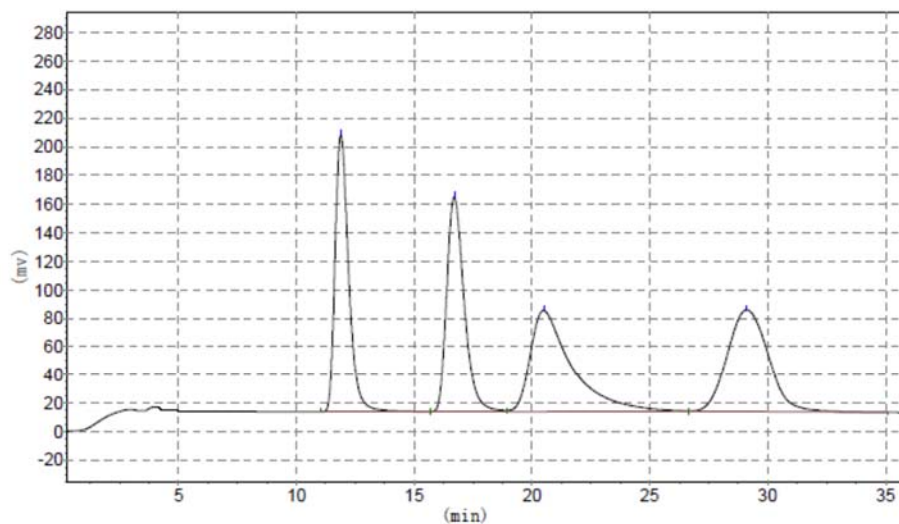

| Peak         | Retention time | Height     | Area         | Area%    |
|--------------|----------------|------------|--------------|----------|
| 1            | 11.878         | 194710.078 | 7842179.500  | 23.6974  |
| 2            | 16.693         | 151225.891 | 7822154.500  | 23.6369  |
| 3            | 20.483         | 71474.602  | 8730518.000  | 26.3818  |
| 4            | 29.110         | 71885.336  | 8698129.000  | 26.2839  |
| <b>Total</b> |                | 489295.906 | 33092981.000 | 100.0000 |

**Chiral**

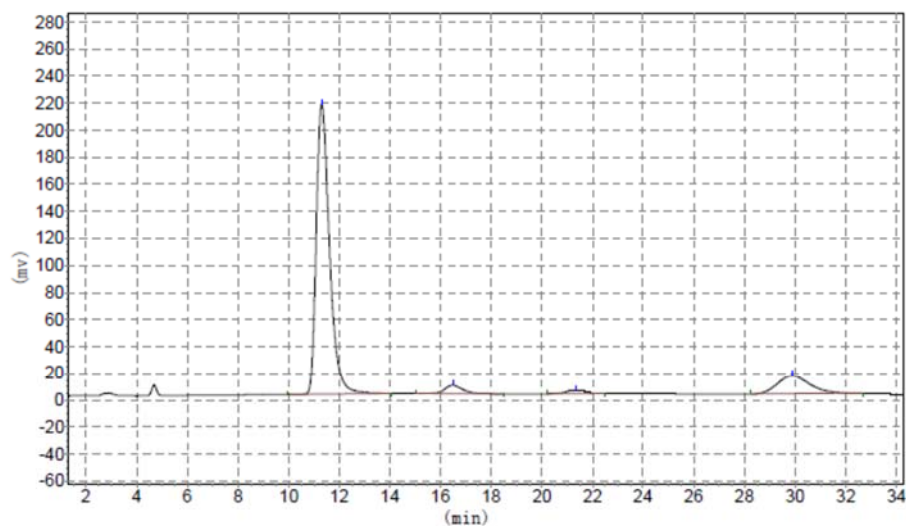

| Peak         | Retention time | Height     | Area        | Area%    |
|--------------|----------------|------------|-------------|----------|
| 1            | 11.307         | 215164.859 | 7801078.000 | 82.8532  |
| 2            | 16.473         | 6121.896   | 299016.125  | 3.1758   |
| 3            | 21.365         | 2431.196   | 133643.063  | 1.4194   |
| 4            | 29.878         | 13475.732  | 1181805.375 | 12.5516  |
| <b>Total</b> |                | 237193.683 | 9415542.563 | 100.0000 |

### 4g (Table 3, entry 7)

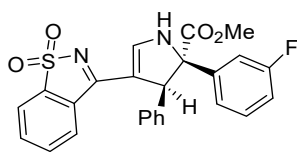

#### Racemic

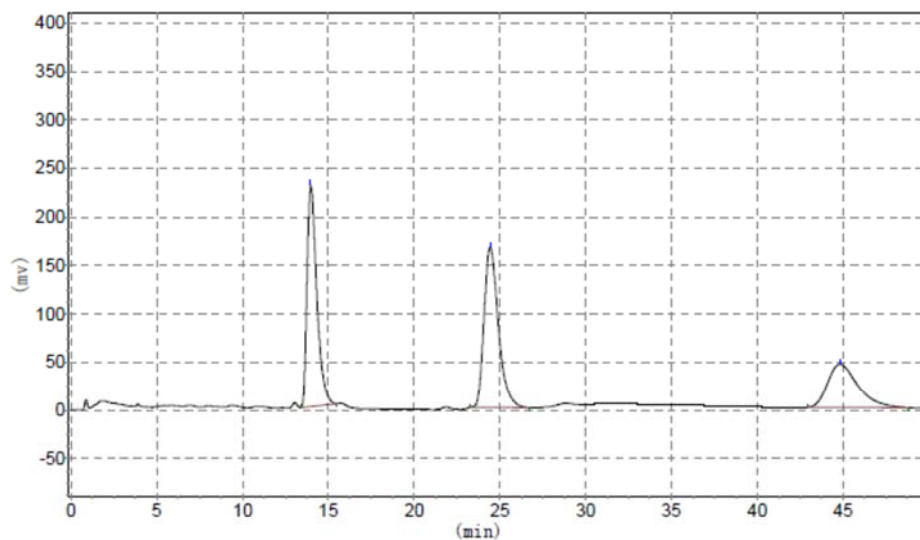

| Peak         | Retention time | Height            | Area                | Area%           |
|--------------|----------------|-------------------|---------------------|-----------------|
| 1            | 13.980         | 228819.375        | 9059898.000         | 37.1878         |
| 2            | 24.438         | 166808.047        | 9706435.000         | 39.8417         |
| 3            | 44.820         | 45369.629         | 5596195.500         | 22.9705         |
| <b>Total</b> |                | <b>440997.051</b> | <b>24362528.500</b> | <b>100.0000</b> |

#### Chiral

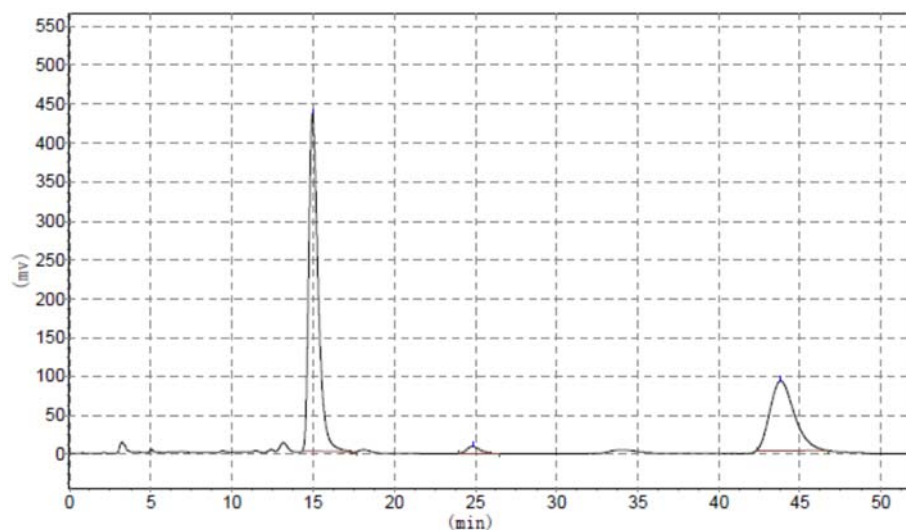

| Peak         | Retention time | Height            | Area                | Area%           |
|--------------|----------------|-------------------|---------------------|-----------------|
| 1            | 14.955         | 434502.188        | 17442820.000        | 64.0665         |
| 2            | 24.823         | 8786.945          | 477696.906          | 1.7546          |
| 3            | 43.803         | 89388.383         | 9305614.000         | 34.1790         |
| <b>Total</b> |                | <b>532677.516</b> | <b>27226130.906</b> | <b>100.0000</b> |

#### 4h (Table 3, entry 8)

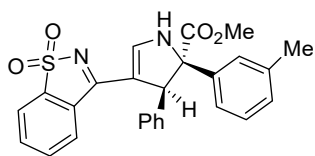

#### Racemic

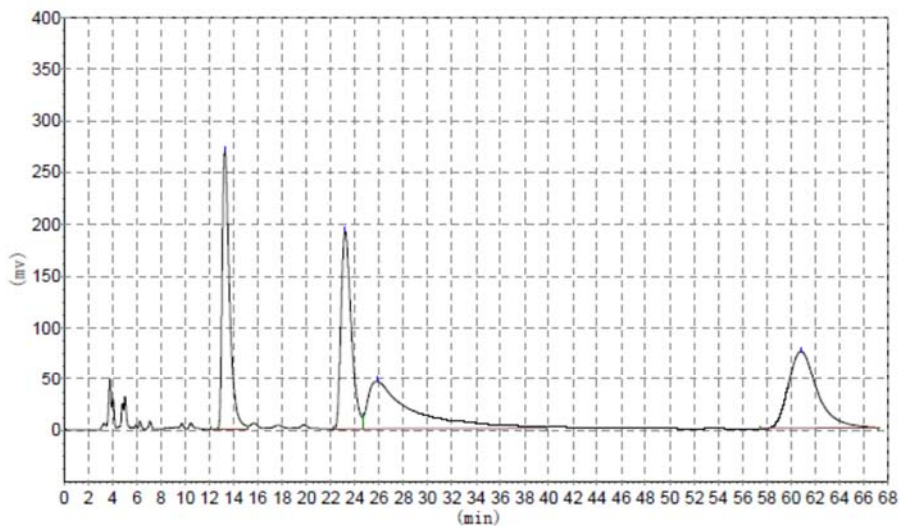

| Peak  | Retention time | Height     | Area         | Area%    |
|-------|----------------|------------|--------------|----------|
| 1     | 13.265         | 270299.188 | 11481567.000 | 23.8575  |
| 2     | 23.215         | 192775.688 | 11405680.000 | 23.6998  |
| 3     | 25.815         | 46635.980  | 12638654.000 | 26.2618  |
| 4     | 60.882         | 75855.086  | 12599795.000 | 26.1810  |
| Total |                | 585565.941 | 48125696.000 | 100.0000 |

#### Chiral

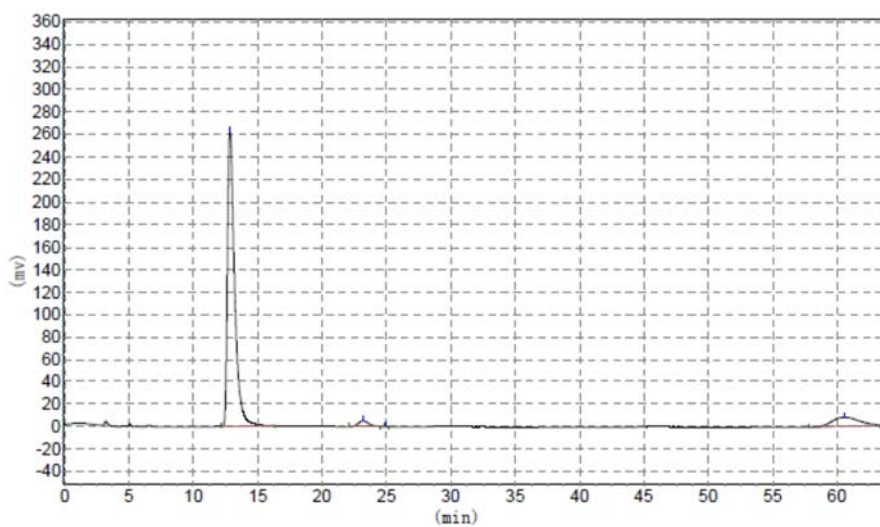

| Peak  | Retention time | Height     | Area         | Area%    |
|-------|----------------|------------|--------------|----------|
| 1     | 12.855         | 261923.563 | 10136469.000 | 87.4364  |
| 2     | 23.182         | 5082.784   | 276807.250   | 2.3877   |
| 3     | 24.958         | 31.316     | 381.300      | 0.0033   |
| 4     | 60.577         | 8134.773   | 1179300.125  | 10.1726  |
| Total |                | 275172.436 | 11592957.675 | 100.0000 |

#### 4i (Table 3, entry 9)

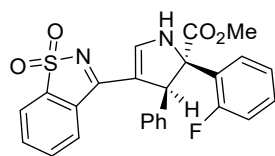

#### Racemic

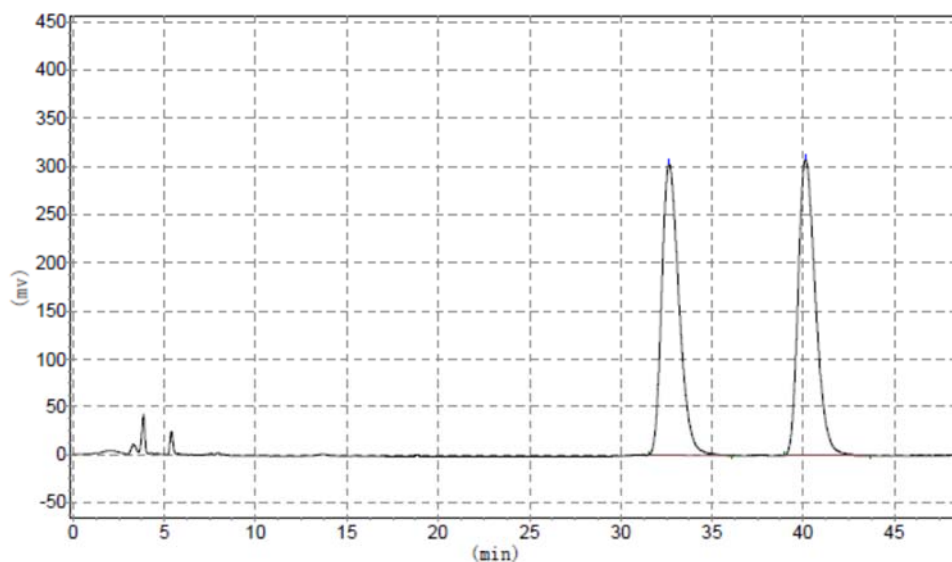

| Peak         | Retention time | Height     | Area         | Area%    |
|--------------|----------------|------------|--------------|----------|
| 1            | 32.657         | 303750.594 | 19968188.000 | 49.4168  |
| 2            | 40.140         | 308599.563 | 20439530.000 | 50.5832  |
| <b>Total</b> |                | 612350.156 | 40407718.000 | 100.0000 |

#### Chiral

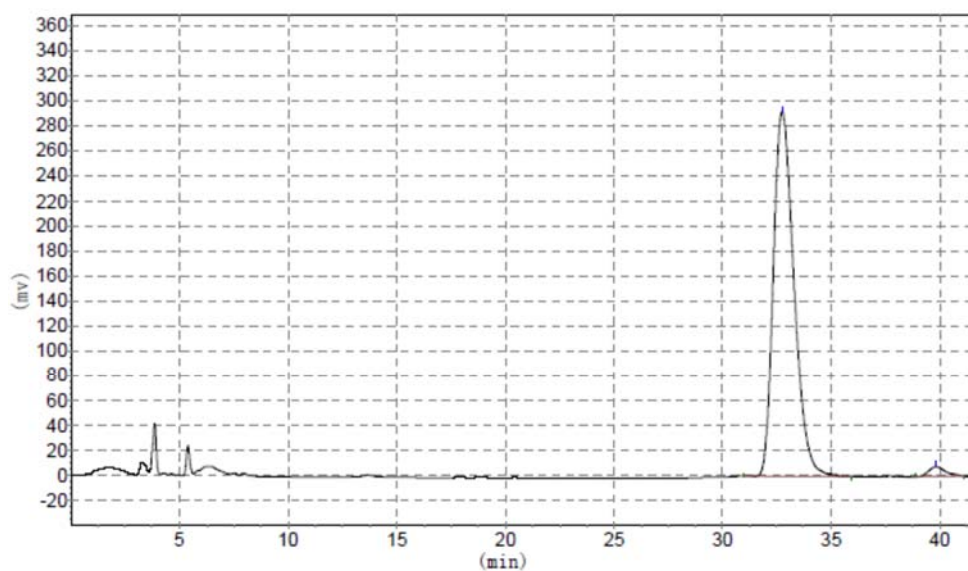

| Peak         | Retention time | Height     | Area         | Area%    |
|--------------|----------------|------------|--------------|----------|
| 1            | 32.737         | 291654.781 | 19232560.000 | 97.7878  |
| 2            | 39.832         | 8096.853   | 435087.594   | 2.2122   |
| <b>Total</b> |                | 299751.634 | 19667647.594 | 100.0000 |

#### 4k (Table 3, entry 11)

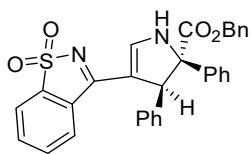

#### Racemic

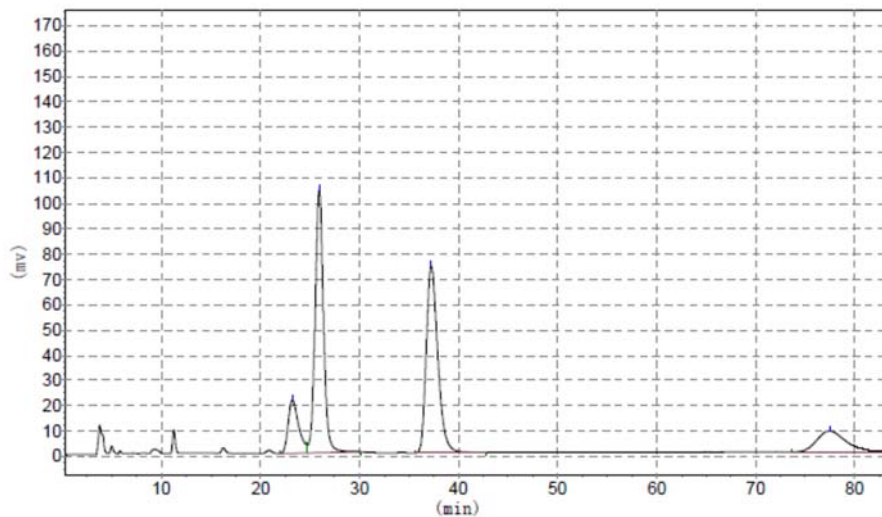

| Peak         | Retention time | Height     | Area         | Area%    |
|--------------|----------------|------------|--------------|----------|
| 1            | 23.228         | 20910.697  | 1542704.250  | 10.0240  |
| 2            | 25.948         | 104093.125 | 6131290.000  | 39.8394  |
| 3            | 37.250         | 74177.664  | 6023186.000  | 39.1369  |
| 4            | 77.453         | 8217.164   | 1692852.000  | 10.9997  |
| <b>Total</b> |                | 207398.650 | 15390032.250 | 100.0000 |

#### Chiral

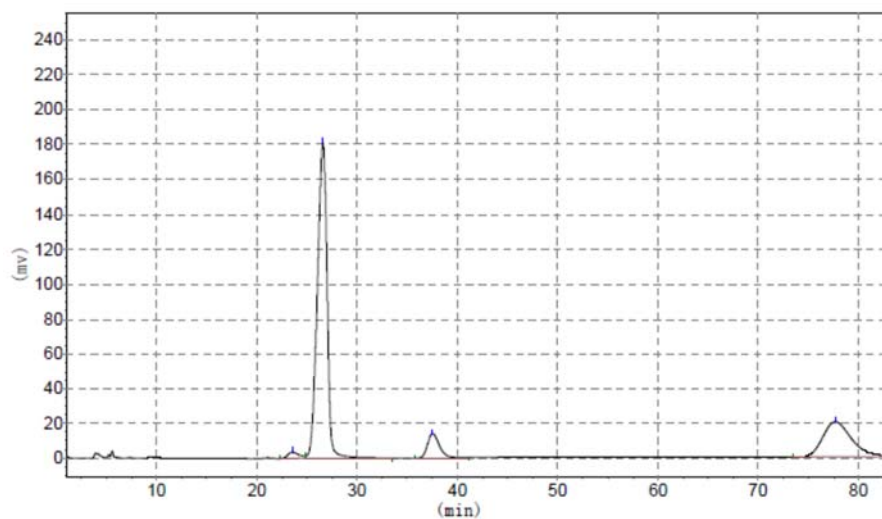

| Peak         | Retention time | Height     | Area         | Area%    |
|--------------|----------------|------------|--------------|----------|
| 1            | 23.532         | 3570.706   | 282637.406   | 1.5947   |
| 2            | 26.588         | 180916.906 | 12200495.000 | 68.8362  |
| 3            | 37.535         | 14089.200  | 1165943.250  | 6.5783   |
| 4            | 77.682         | 20132.754  | 4074880.750  | 22.9908  |
| <b>Total</b> |                | 218709.566 | 17723956.406 | 100.0000 |

4l (Table 3, entry 12)

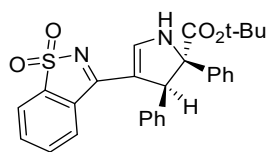

Racemic

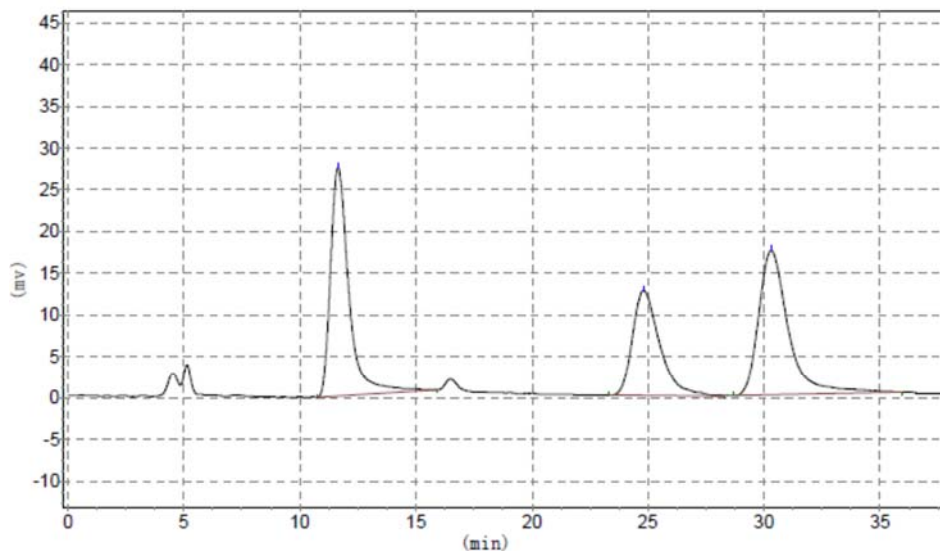

| Peak         | Retention time | Height    | Area        | Area%    |
|--------------|----------------|-----------|-------------|----------|
| 1            | 11.645         | 27423.449 | 1522017.125 | 36.9237  |
| 2            | 24.813         | 12685.854 | 1039606.563 | 25.2206  |
| 3            | 30.307         | 17395.816 | 1560434.500 | 37.8557  |
| <b>Total</b> |                | 57505.120 | 4122058.188 | 100.0000 |

Chiral

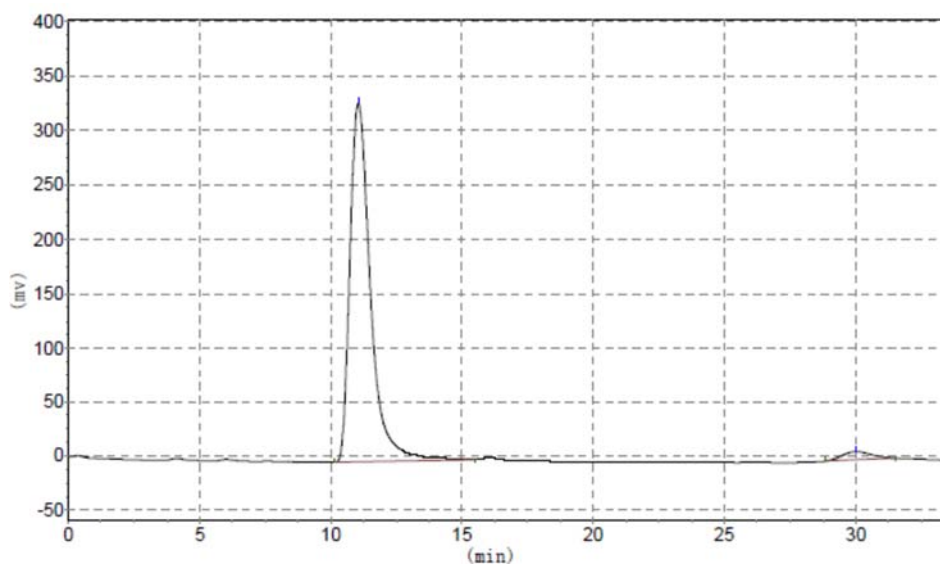

| Peak         | Retention time | Height     | Area         | Area%    |
|--------------|----------------|------------|--------------|----------|
| 1            | 11.045         | 330377.688 | 17988976.000 | 96.7999  |
| 2            | 30.018         | 7637.205   | 594700.000   | 3.2001   |
| <b>Total</b> |                | 338014.892 | 18583676.000 | 100.0000 |

#### 4m (Table 3, entry 13)

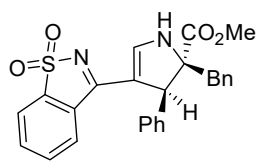

#### Racemic

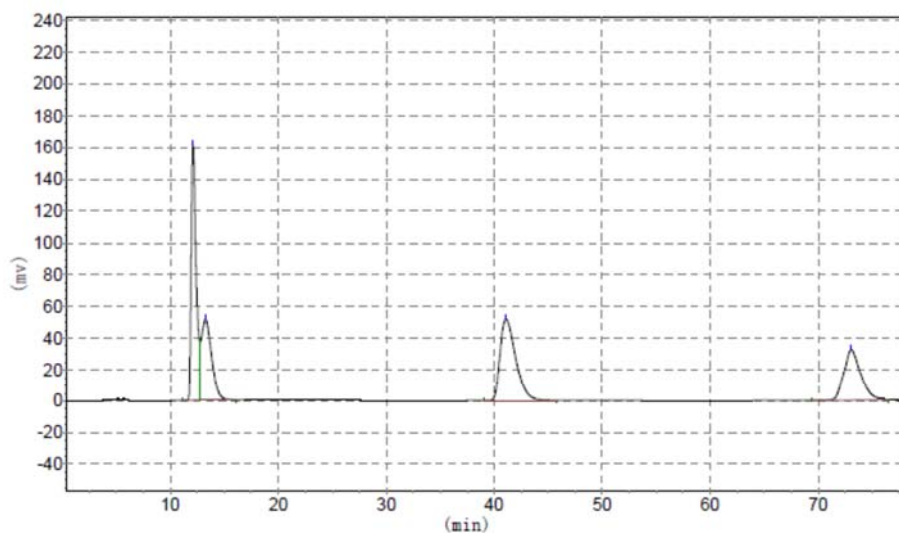

| Peak         | Retention time | Height     | Area         | Area%    |
|--------------|----------------|------------|--------------|----------|
| 1            | 12.090         | 161402.922 | 5310817.500  | 30.4710  |
| 2            | 13.237         | 51354.984  | 3383643.500  | 19.4138  |
| 3            | 41.088         | 51828.617  | 5216984.000  | 29.9326  |
| 4            | 73.078         | 32181.967  | 3517646.250  | 20.1826  |
| <b>Total</b> |                | 296768.490 | 17429091.250 | 100.0000 |

#### Chiral

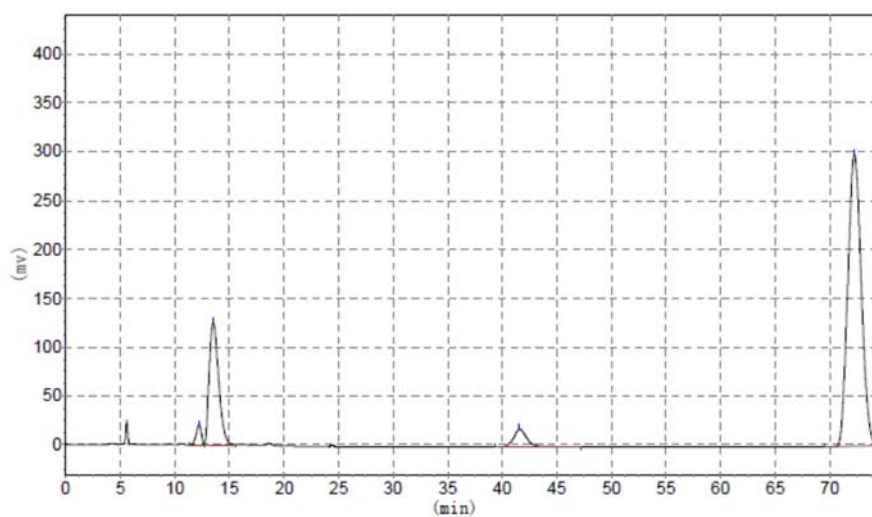

| Peak         | Retention time | Height     | Area         | Area%    |
|--------------|----------------|------------|--------------|----------|
| 1            | 12.212         | 20513.926  | 691226.375   | 1.9597   |
| 2            | 13.497         | 126119.852 | 7616079.500  | 21.5925  |
| 3            | 41.593         | 17859.039  | 1485583.375  | 4.2118   |
| 4            | 72.238         | 297892.031 | 25478998.000 | 72.2360  |
| <b>Total</b> |                | 462384.848 | 35271887.250 | 100.0000 |

### 4n (Table 4, entry 1)

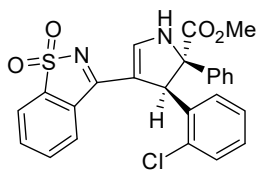

#### Racemic

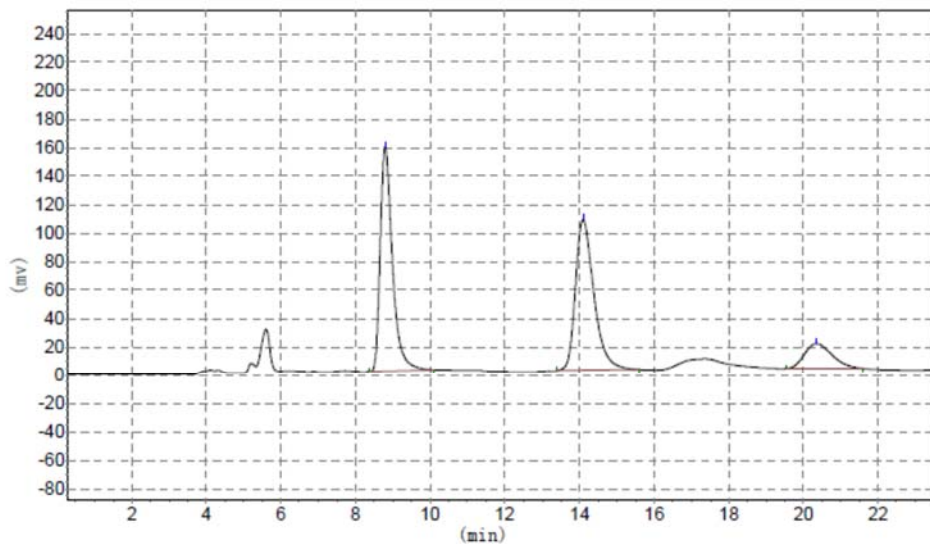

| Peak         | Retention time | Height            | Area               | Area%           |
|--------------|----------------|-------------------|--------------------|-----------------|
| 1            | 8.792          | 157742.156        | 3582106.000        | 43.9714         |
| 2            | 14.092         | 105834.430        | 3659770.250        | 44.9248         |
| 3            | 20.345         | 17628.172         | 904562.125         | 11.1038         |
| <b>Total</b> |                | <b>281204.758</b> | <b>8146438.375</b> | <b>100.0000</b> |

#### Chiral

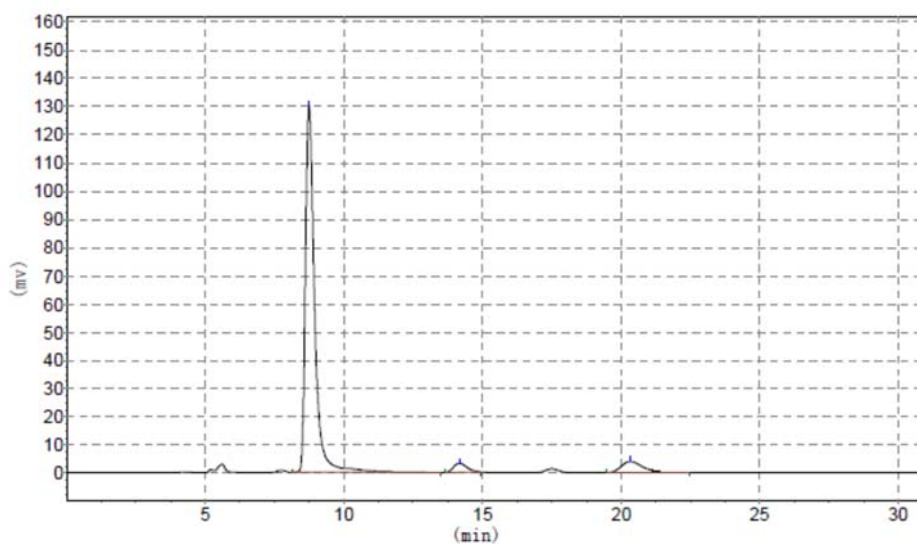

| Peak         | Retention time | Height            | Area               | Area%           |
|--------------|----------------|-------------------|--------------------|-----------------|
| 1            | 8.740          | 130179.602        | 3035232.500        | 90.3376         |
| 2            | 14.165         | 3142.485          | 103617.398         | 3.0840          |
| 3            | 20.322         | 3998.549          | 221028.109         | 6.5785          |
| <b>Total</b> |                | <b>137320.635</b> | <b>3359878.008</b> | <b>100.0000</b> |



#### 4o (Table 4, entry 2)

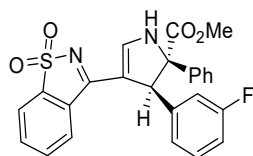

#### Racemic

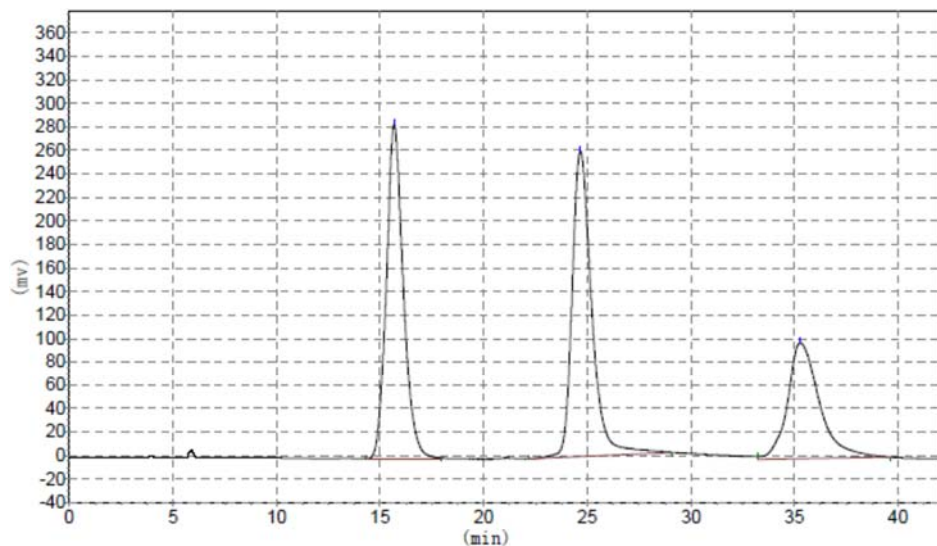

| Peak         | Retention time | Height            | Area                | Area%           |
|--------------|----------------|-------------------|---------------------|-----------------|
| 1            | 15.673         | 285406.281        | 16221143.000        | 37.0300         |
| 2            | 24.660         | 260305.719        | 17044800.000        | 38.9103         |
| 3            | 35.290         | 99082.859         | 10539441.000        | 24.0597         |
| <b>Total</b> |                | <b>644794.859</b> | <b>43805384.000</b> | <b>100.0000</b> |

#### Chiral

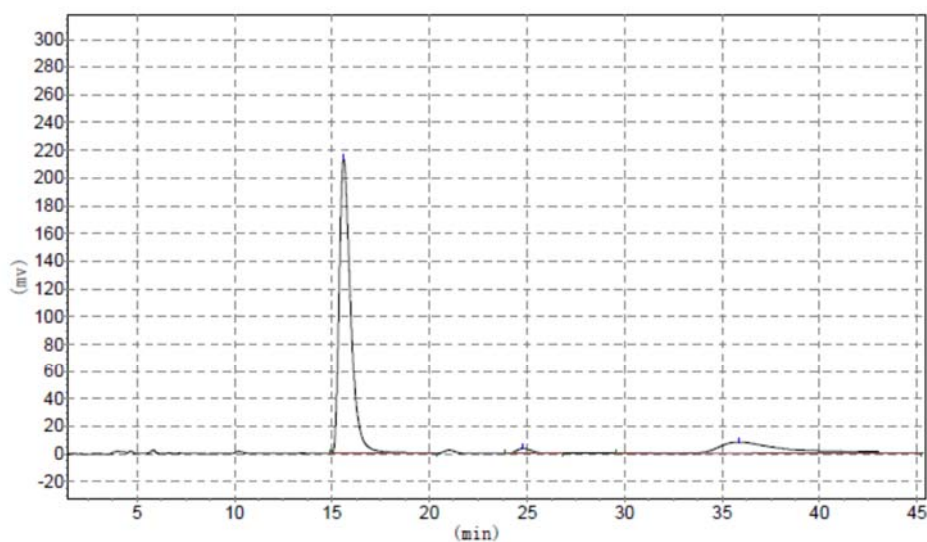

| Peak         | Retention time | Height            | Area                | Area%           |
|--------------|----------------|-------------------|---------------------|-----------------|
| 1            | 15.592         | 213215.516        | 8755926.000         | 81.1981         |
| 2            | 24.790         | 3748.384          | 210882.281          | 1.9556          |
| 3            | 35.867         | 8195.339          | 1816604.125         | 16.8463         |
| <b>Total</b> |                | <b>225159.238</b> | <b>10783412.406</b> | <b>100.0000</b> |

### 4p (Table 4, entry 3)

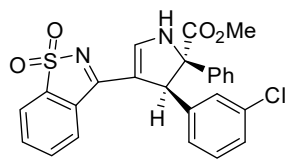

#### Racemic

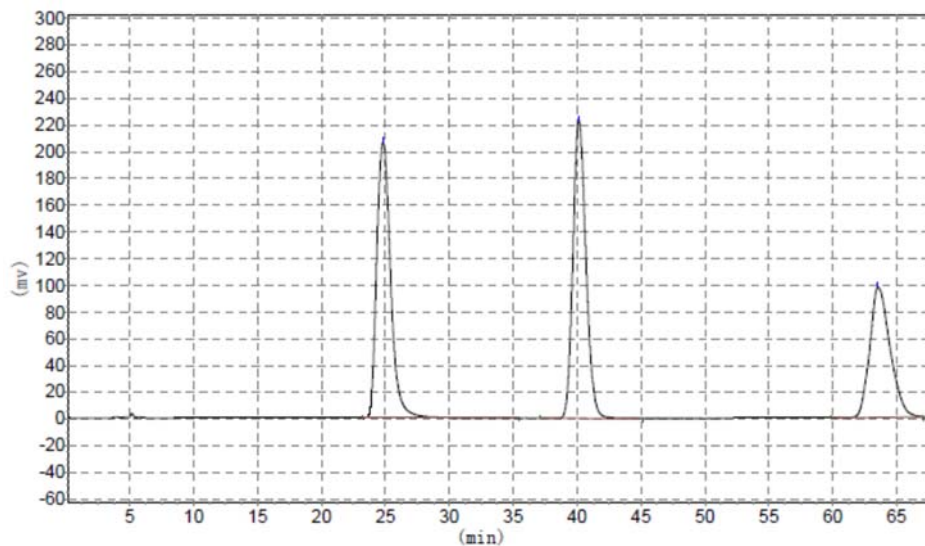

| Peak         | Retention time | Height     | Area         | Area%    |
|--------------|----------------|------------|--------------|----------|
| 1            | 24.825         | 206742.641 | 15763546.000 | 37.1447  |
| 2            | 40.140         | 223284.297 | 15807227.000 | 37.2476  |
| 3            | 63.557         | 97926.133  | 10867467.000 | 25.6077  |
| <b>Total</b> |                | 527953.070 | 42438240.000 | 100.0000 |

#### Chiral

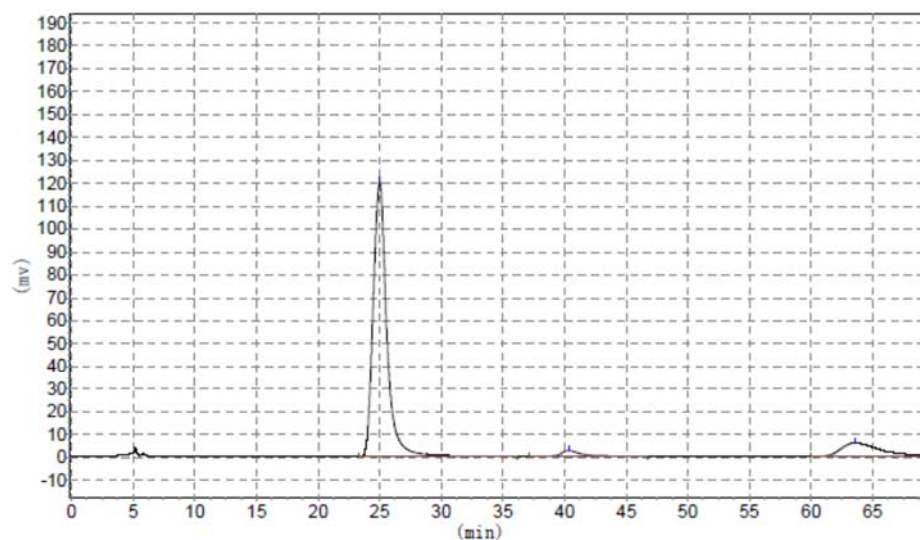

| Peak         | Retention time | Height     | Area         | Area%    |
|--------------|----------------|------------|--------------|----------|
| 1            | 24.998         | 119885.594 | 9201099.000  | 85.4607  |
| 2            | 40.332         | 2435.667   | 262005.406   | 2.4335   |
| 3            | 63.598         | 5846.000   | 1303361.500  | 12.1058  |
| <b>Total</b> |                | 128167.260 | 10766465.906 | 100.0000 |

**4q (Table 4, entry 4)**

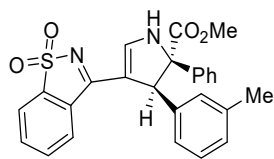

**Racemic**

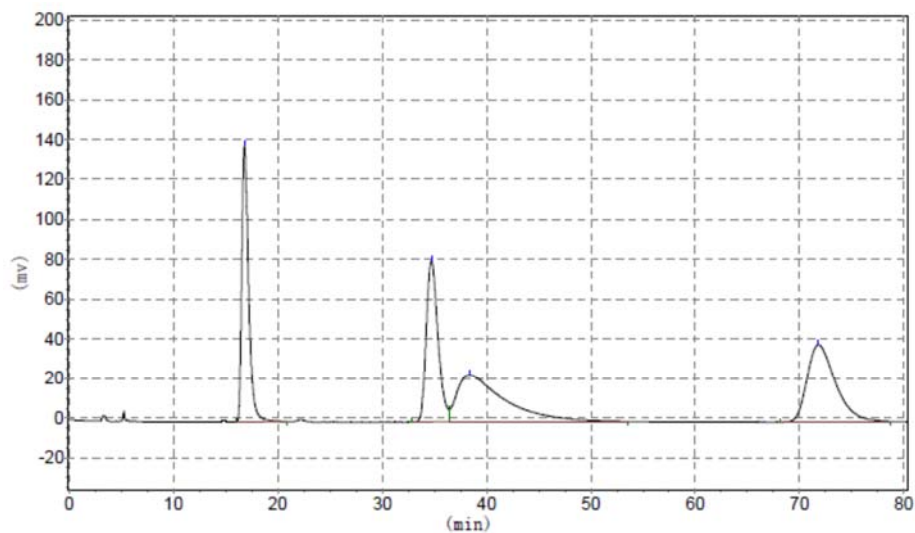

| Peak         | Retention time | Height     | Area         | Area%    |
|--------------|----------------|------------|--------------|----------|
| 1            | 16.788         | 138617.625 | 6356400.000  | 23.0090  |
| 2            | 34.708         | 81340.820  | 6364089.000  | 23.0368  |
| 3            | 38.348         | 23874.357  | 7608476.000  | 27.5413  |
| 4            | 71.793         | 39015.191  | 7296741.500  | 26.4129  |
| <b>Total</b> |                | 282847.994 | 27625706.500 | 100.0000 |

**Chiral**

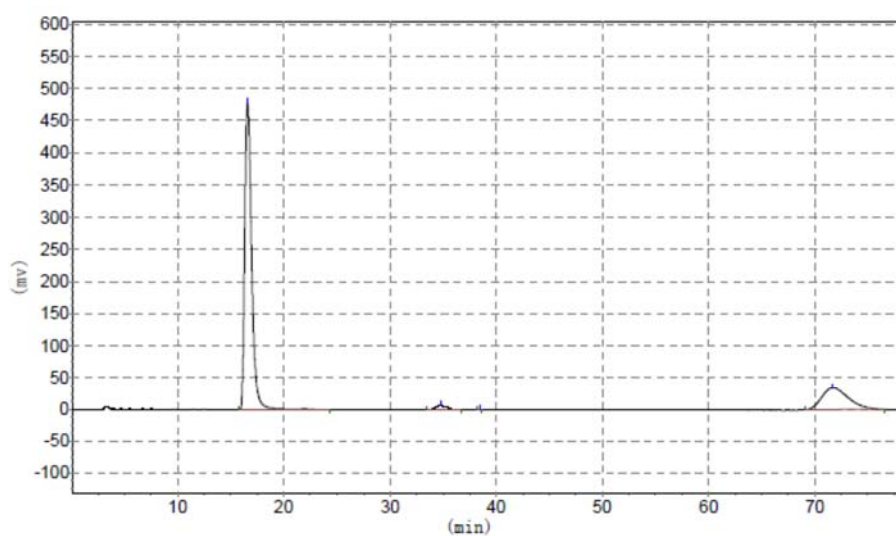

| Peak         | Retention time | Height     | Area         | Area%    |
|--------------|----------------|------------|--------------|----------|
| 1            | 16.583         | 478014.938 | 21671138.000 | 77.1799  |
| 2            | 34.733         | 5947.969   | 443781.813   | 1.5805   |
| 3            | 38.422         | 90.676     | 1055.800     | 0.0038   |
| 4            | 71.693         | 34259.816  | 5962764.500  | 21.2359  |
| <b>Total</b> |                | 518313.399 | 28078740.112 | 100.0000 |

#### 4r (Table 4, entry 5)

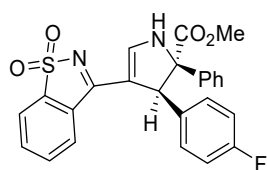

#### Racemic

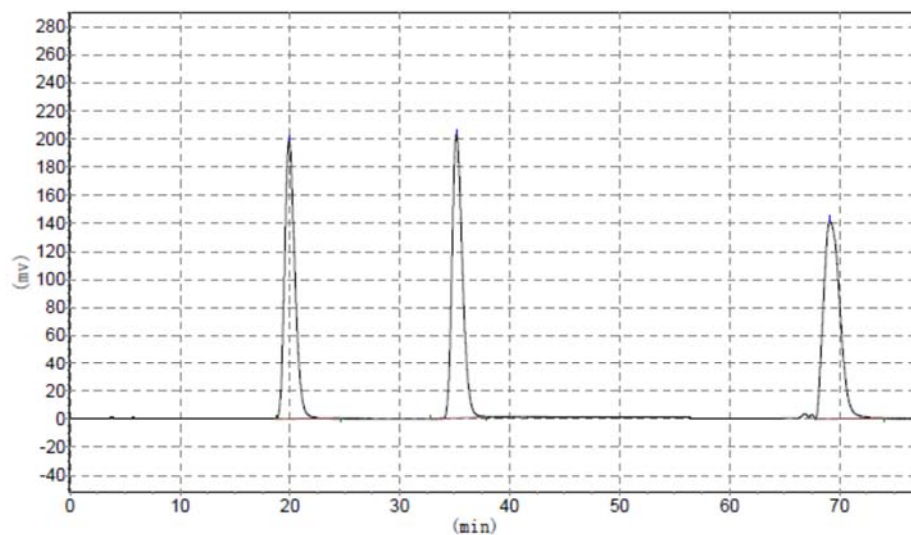

| Peak         | Retention time | Height     | Area         | Area%    |
|--------------|----------------|------------|--------------|----------|
| 1            | 19.925         | 198440.438 | 12911352.000 | 31.6712  |
| 2            | 35.155         | 202752.406 | 13288399.000 | 32.5961  |
| 3            | 69.113         | 141638.297 | 14567081.000 | 35.7327  |
| <b>Total</b> |                | 542831.141 | 40766832.000 | 100.0000 |

#### Chiral

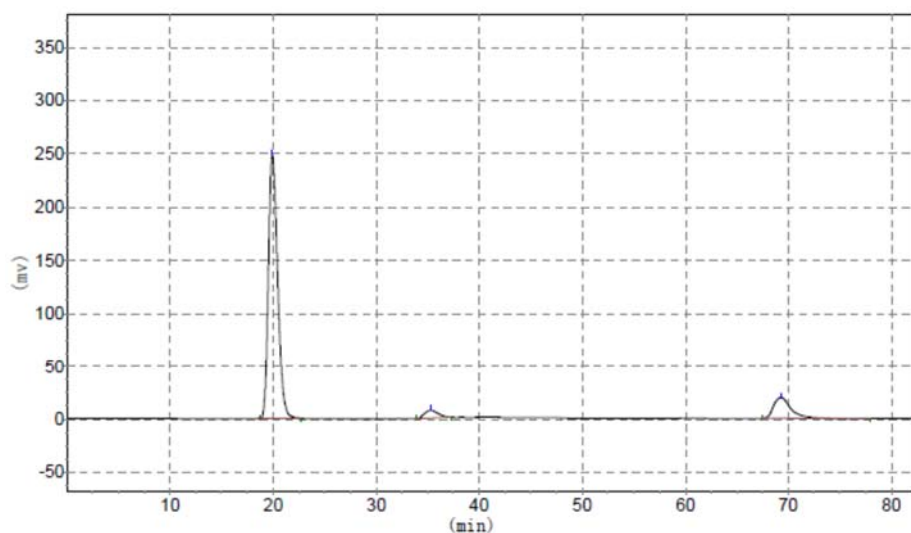

| Peak         | Retention time | Height     | Area         | Area%    |
|--------------|----------------|------------|--------------|----------|
| 1            | 19.920         | 248424.703 | 15545481.000 | 83.7164  |
| 2            | 35.272         | 7460.004   | 673762.688   | 3.6284   |
| 3            | 69.287         | 19828.586  | 2349978.000  | 12.6552  |
| <b>Total</b> |                | 275713.293 | 18569221.688 | 100.0000 |

### 4s (Table 4, entry 6)

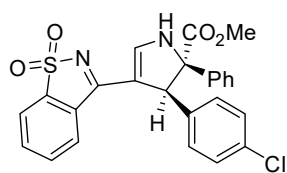

#### Racemic

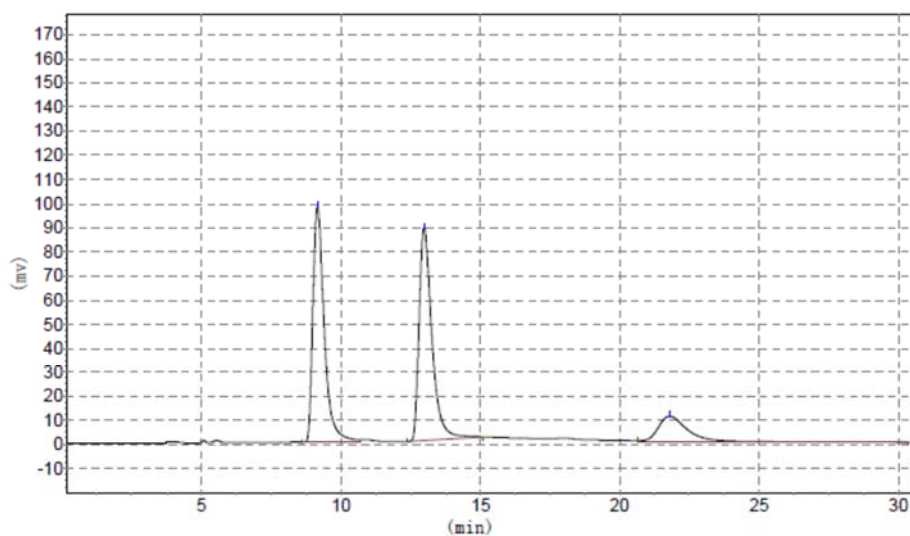

| Peak         | Retention time | Height            | Area               | Area%           |
|--------------|----------------|-------------------|--------------------|-----------------|
| 1            | 9.150          | 98260.438         | 2802019.000        | 42.9699         |
| 2            | 12.977         | 88737.117         | 2829233.750        | 43.3872         |
| 3            | 21.790         | 10873.801         | 889637.250         | 13.6429         |
| <b>Total</b> |                | <b>197871.355</b> | <b>6520890.000</b> | <b>100.0000</b> |

#### Chiral

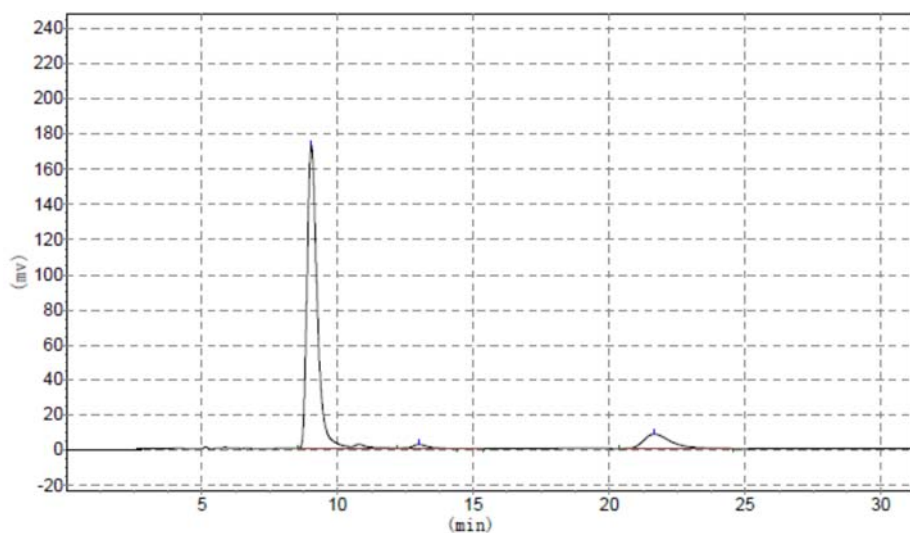

| Peak         | Retention time | Height            | Area               | Area%           |
|--------------|----------------|-------------------|--------------------|-----------------|
| 1            | 9.032          | 172357.313        | 4605579.500        | 87.7901         |
| 2            | 12.998         | 2082.070          | 69249.352          | 1.3200          |
| 3            | 21.660         | 8210.159          | 571297.625         | 10.8899         |
| <b>Total</b> |                | <b>182649.542</b> | <b>5246126.477</b> | <b>100.0000</b> |

#### 4t (Table 4, entry 7)

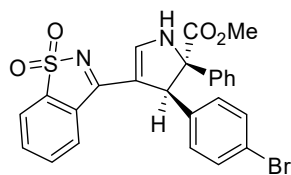

#### Racemic

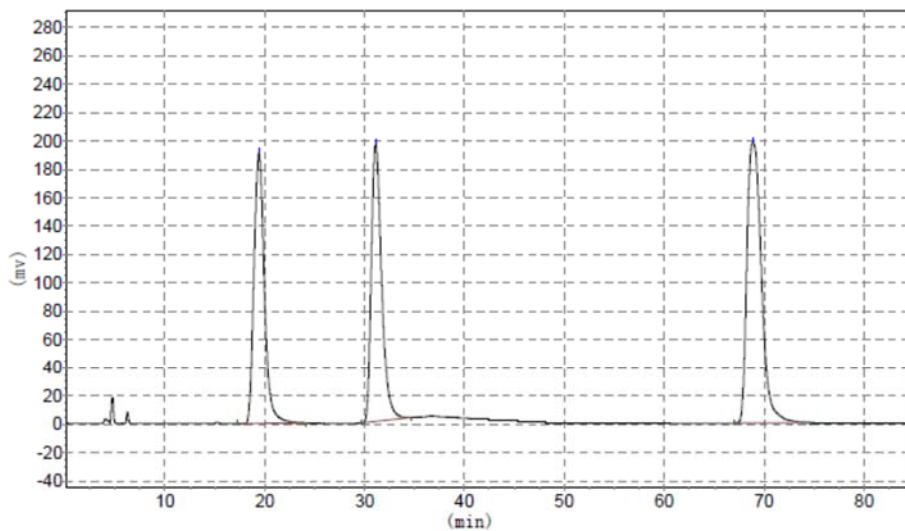

| Peak         | Retention time | Height     | Area         | Area%    |
|--------------|----------------|------------|--------------|----------|
| 1            | 19.420         | 191246.922 | 13886921.000 | 28.9673  |
| 2            | 31.107         | 195623.828 | 14031783.000 | 29.2695  |
| 3            | 68.903         | 198306.875 | 20021316.000 | 41.7633  |
| <b>Total</b> |                | 585177.625 | 47940020.000 | 100.0000 |

#### Chiral

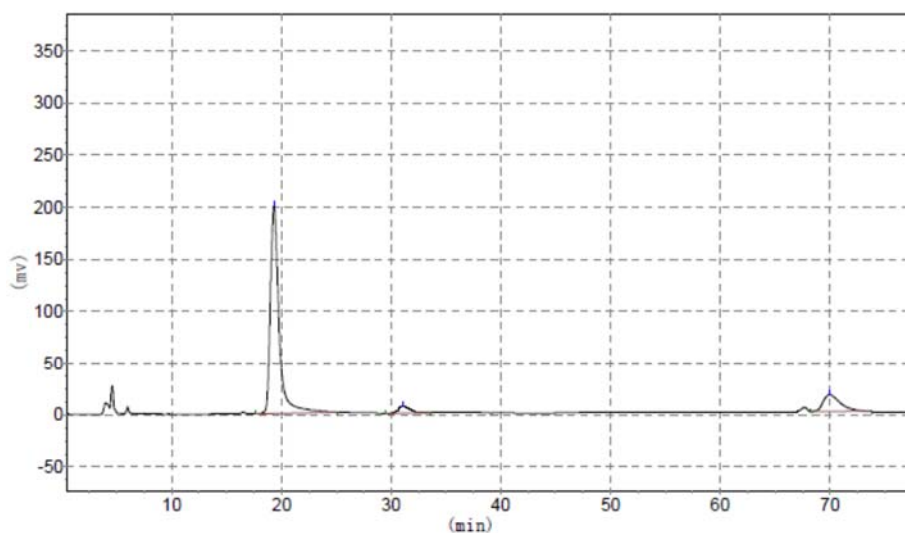

| Peak         | Retention time | Height     | Area         | Area%    |
|--------------|----------------|------------|--------------|----------|
| 1            | 19.312         | 200756.734 | 11070367.000 | 82.5288  |
| 2            | 31.108         | 6946.273   | 495897.813   | 3.6969   |
| 3            | 69.967         | 16300.468  | 1847674.125  | 13.7743  |
| <b>Total</b> |                | 224003.476 | 13413938.938 | 100.0000 |

4u (Table 4, entry 8)

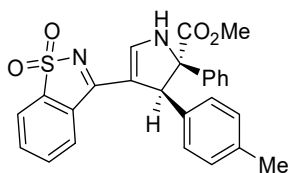

Racemic

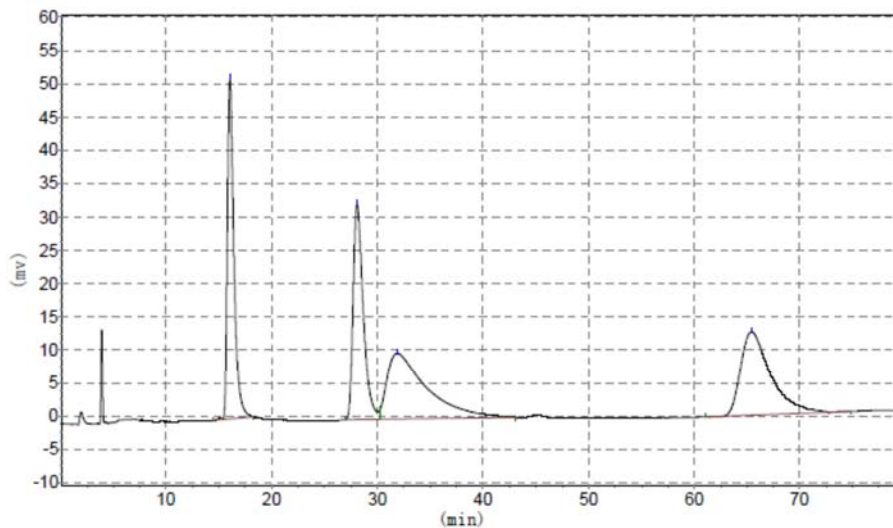

| Peak         | Retention time | Height     | Area        | Area%    |
|--------------|----------------|------------|-------------|----------|
| 1            | 16.067         | 51159.629  | 2191268.000 | 23.1218  |
| 2            | 28.097         | 32495.781  | 2185266.250 | 23.0585  |
| 3            | 31.883         | 9968.766   | 2581487.000 | 27.2393  |
| 4            | 65.392         | 12686.282  | 2519041.000 | 26.5804  |
| <b>Total</b> |                | 106310.458 | 9477062.250 | 100.0000 |

Chiral

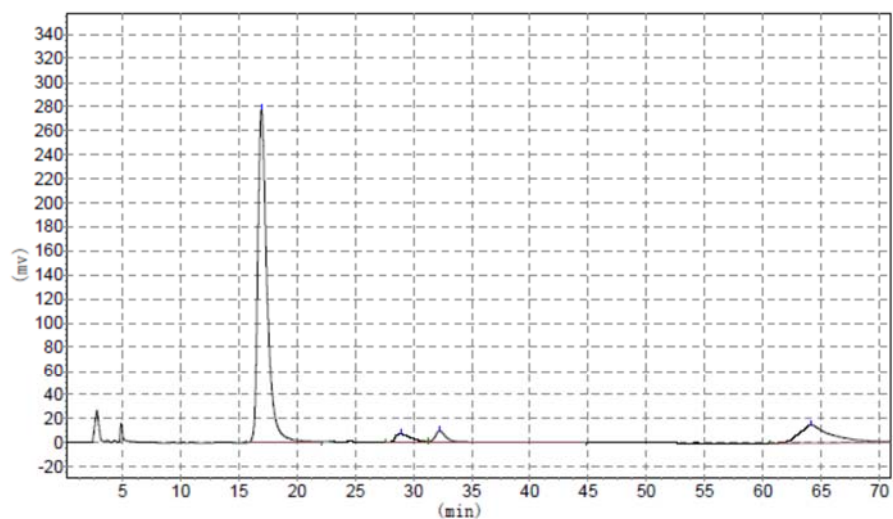

| Peak         | Retention time | Height     | Area         | Area%    |
|--------------|----------------|------------|--------------|----------|
| 1            | 16.925         | 277747.469 | 15378618.000 | 77.5485  |
| 2            | 28.852         | 7485.595   | 790429.875   | 3.9858   |
| 3            | 32.228         | 9891.167   | 815234.500   | 4.1109   |
| 4            | 64.097         | 15126.865  | 2846682.750  | 14.3547  |
| <b>Total</b> |                | 310251.096 | 19830965.125 | 100.0000 |

4v (Table 4, entry 9)

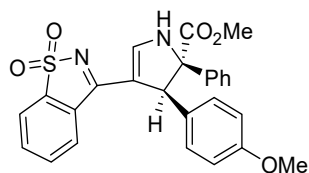

**Racemic**

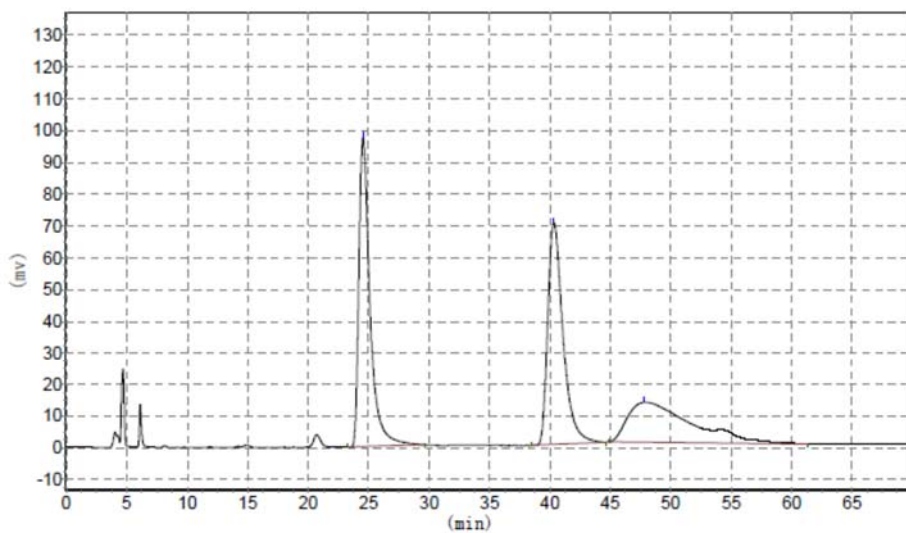

| Peak         | Retention time | Height     | Area         | Area%    |
|--------------|----------------|------------|--------------|----------|
| 1            | 24.537         | 97539.234  | 6235758.000  | 36.6817  |
| 2            | 40.323         | 69938.875  | 6144945.500  | 36.1475  |
| 3            | 47.827         | 12599.236  | 4618935.500  | 27.1708  |
| <b>Total</b> |                | 180077.346 | 16999639.000 | 100.0000 |

**Chiral**

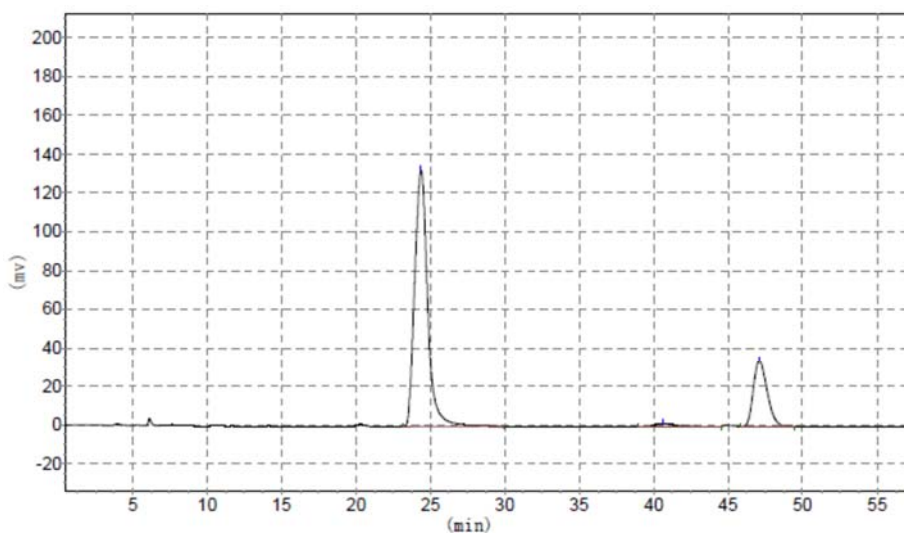

| Peak      | Retention time | Height     | Area         | Area%    |
|-----------|----------------|------------|--------------|----------|
| 1         | 24.377         | 132587.281 | 8046901.000  | 77.5030  |
| 2         | 40.613         | 1664.705   | 160210.563   | 1.5431   |
| 3         | 47.088         | 33887.980  | 2175585.500  | 20.9540  |
| <b>总计</b> |                | 168139.967 | 10382697.063 | 100.0000 |



#### 4w (Table 4, entry 10)

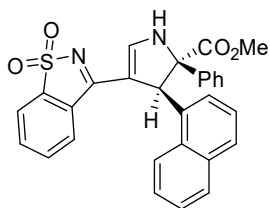

#### Racemic

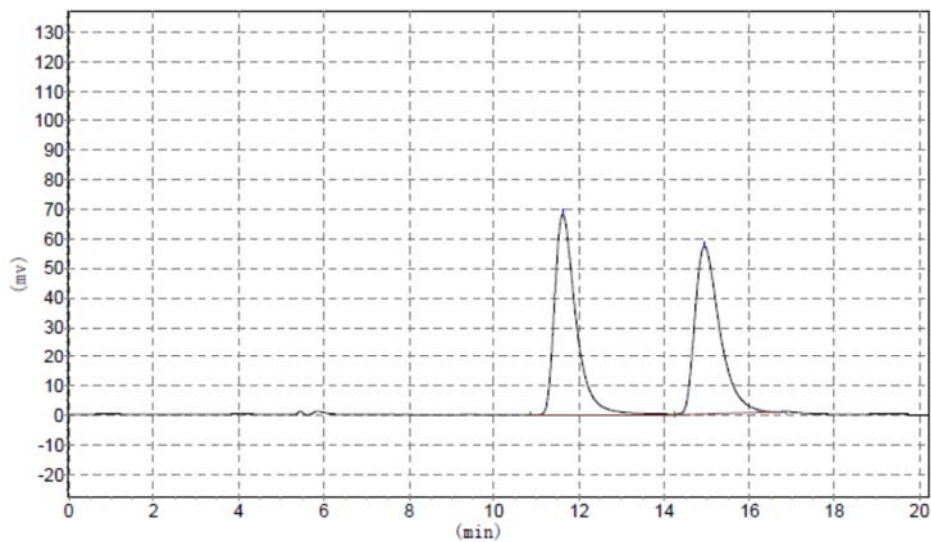

| Peak         | Retention time | Height     | Area        | Area%    |
|--------------|----------------|------------|-------------|----------|
| 1            | 11.613         | 68207.664  | 2398505.250 | 50.7458  |
| 2            | 14.947         | 57177.012  | 2328000.500 | 49.2542  |
| <b>Total</b> |                | 125384.676 | 4726505.750 | 100.0000 |

#### Chiral

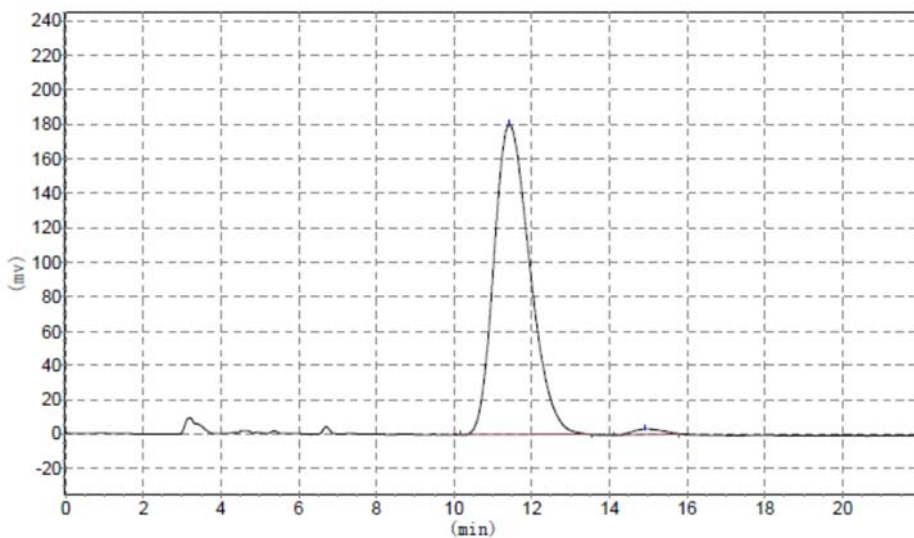

| Peak         | Retention time | Height     | Area         | Area%    |
|--------------|----------------|------------|--------------|----------|
| 1            | 11.422         | 180336.547 | 11554340.000 | 98.5142  |
| 2            | 14.917         | 3297.988   | 174267.797   | 1.4858   |
| <b>Total</b> |                | 183634.535 | 11728607.797 | 100.0000 |

### 4x (Table 4, entry 11)

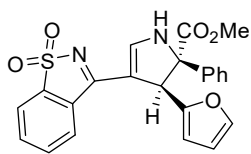

### Racemic

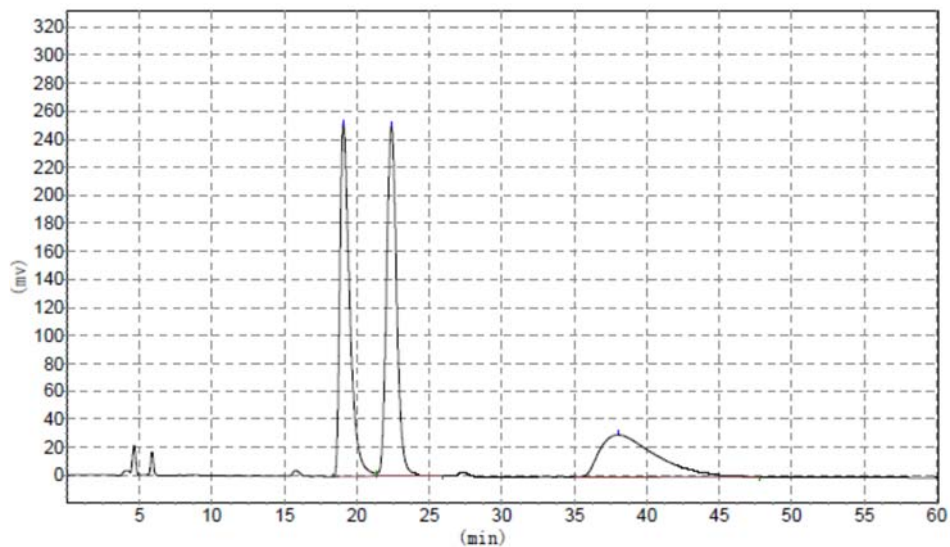

| Peak         | Retention time | Height            | Area                | Area%           |
|--------------|----------------|-------------------|---------------------|-----------------|
| 1            | 19.098         | 251772.563        | 11986988.000        | 37.0855         |
| 2            | 22.398         | 250533.313        | 12249845.000        | 37.8987         |
| 3            | 38.032         | 30007.844         | 8085767.000         | 25.0158         |
| <b>Total</b> |                | <b>532313.719</b> | <b>32322600.000</b> | <b>100.0000</b> |

### Chiral

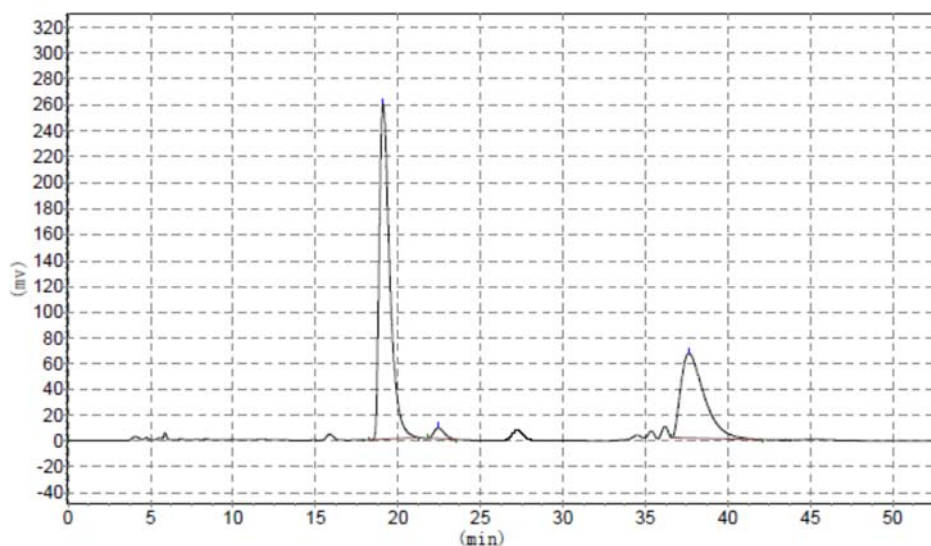

| Peak         | Retention time | Height            | Area                | Area%           |
|--------------|----------------|-------------------|---------------------|-----------------|
| 1            | 19.100         | 259251.797        | 11509460.000        | 62.7137         |
| 2            | 22.452         | 8347.351          | 364916.406          | 1.9884          |
| 3            | 37.633         | 66356.953         | 6478016.000         | 35.2979         |
| <b>Total</b> |                | <b>333956.101</b> | <b>18352392.406</b> | <b>100.0000</b> |

4y (Table 4, entry 12)

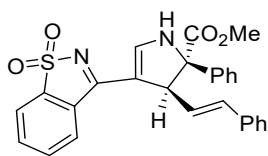

Racemic

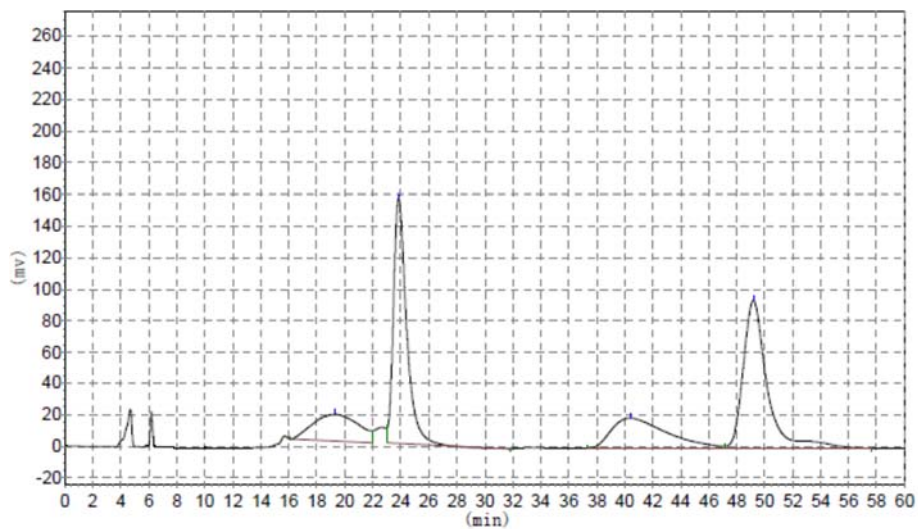

| Peak         | Retention time | Height     | Area         | Area%    |
|--------------|----------------|------------|--------------|----------|
| 1            | 19.332         | 21456.334  | 5414917.000  | 16.4350  |
| 2            | 23.865         | 158908.484 | 10942670.000 | 33.2126  |
| 3            | 40.398         | 19204.971  | 5337431.500  | 16.1999  |
| 4            | 49.198         | 93895.008  | 11252356.000 | 34.1525  |
| <b>Total</b> |                | 293464.797 | 32947374.500 | 100.0000 |

Chiral

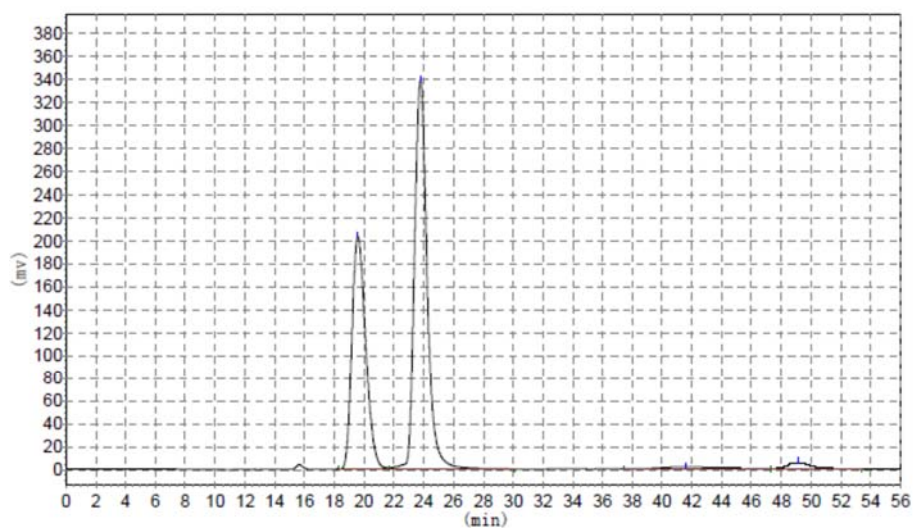

| Peak         | Retention time | Height     | Area         | Area%    |
|--------------|----------------|------------|--------------|----------|
| 1            | 19.598         | 203591.016 | 13118973.000 | 38.1022  |
| 2            | 23.798         | 338550.188 | 20067078.000 | 58.2820  |
| 3            | 41.598         | 1725.702   | 487348.750   | 1.4154   |
| 4            | 49.132         | 5627.227   | 631390.813   | 1.8338   |
| <b>Total</b> |                | 553658.592 | 34431009.664 | 100.0000 |

4z (Table 4, entry 13)

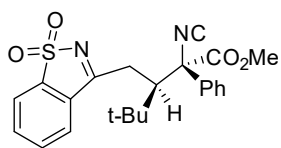

Racemic

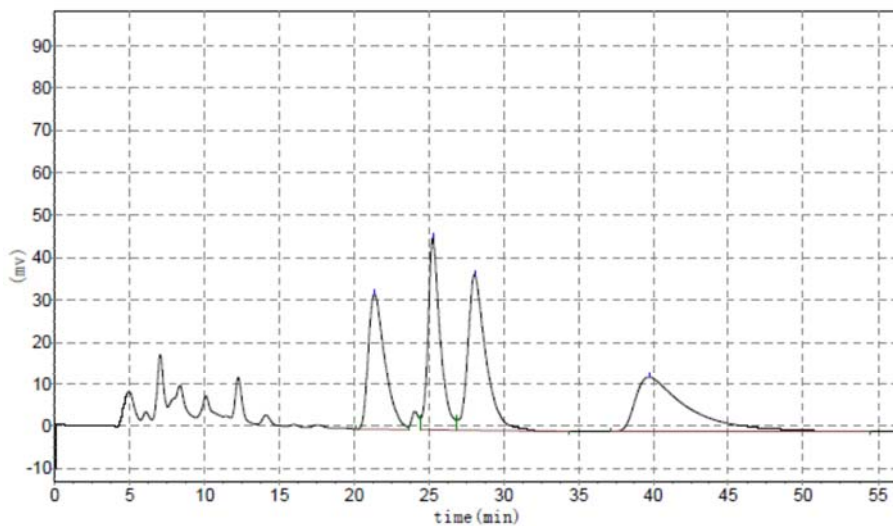

| Peak         | Retention time | Height     | Area         | Area%    |
|--------------|----------------|------------|--------------|----------|
| 1            | 21.390         | 32231.285  | 2476681.500  | 22.1820  |
| 2            | 25.257         | 45553.855  | 2546036.750  | 22.8031  |
| 3            | 28.057         | 37019.855  | 3080149.750  | 27.5868  |
| 4            | 39.723         | 12814.225  | 3062430.250  | 27.4281  |
| <b>Total</b> |                | 127619.221 | 11165298.250 | 100.0000 |

Chiral

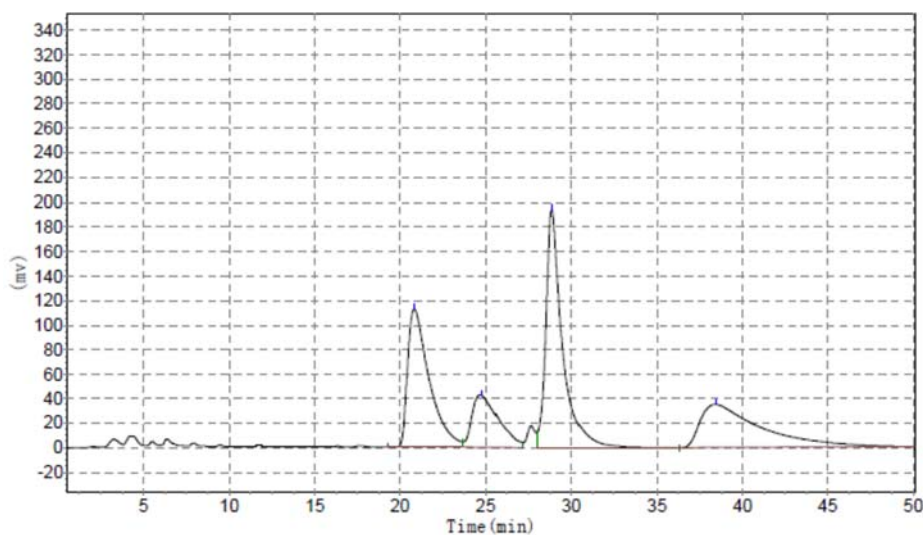

| Peak         | Retention time | Height     | Area         | Area%    |
|--------------|----------------|------------|--------------|----------|
| 1            | 20.832         | 113487.648 | 9987124.000  | 27.5604  |
| 2            | 24.732         | 42657.016  | 4620986.500  | 12.7521  |
| 3            | 28.865         | 193805.641 | 12980628.000 | 35.8213  |
| 4            | 38.465         | 34993.746  | 8648422.000  | 23.8662  |
| <b>Total</b> |                | 384944.051 | 36237160.500 | 100.0000 |

#### 4. Copies of NMR Spectra for the Compounds 4

$^1\text{H}$  NMR of 4a

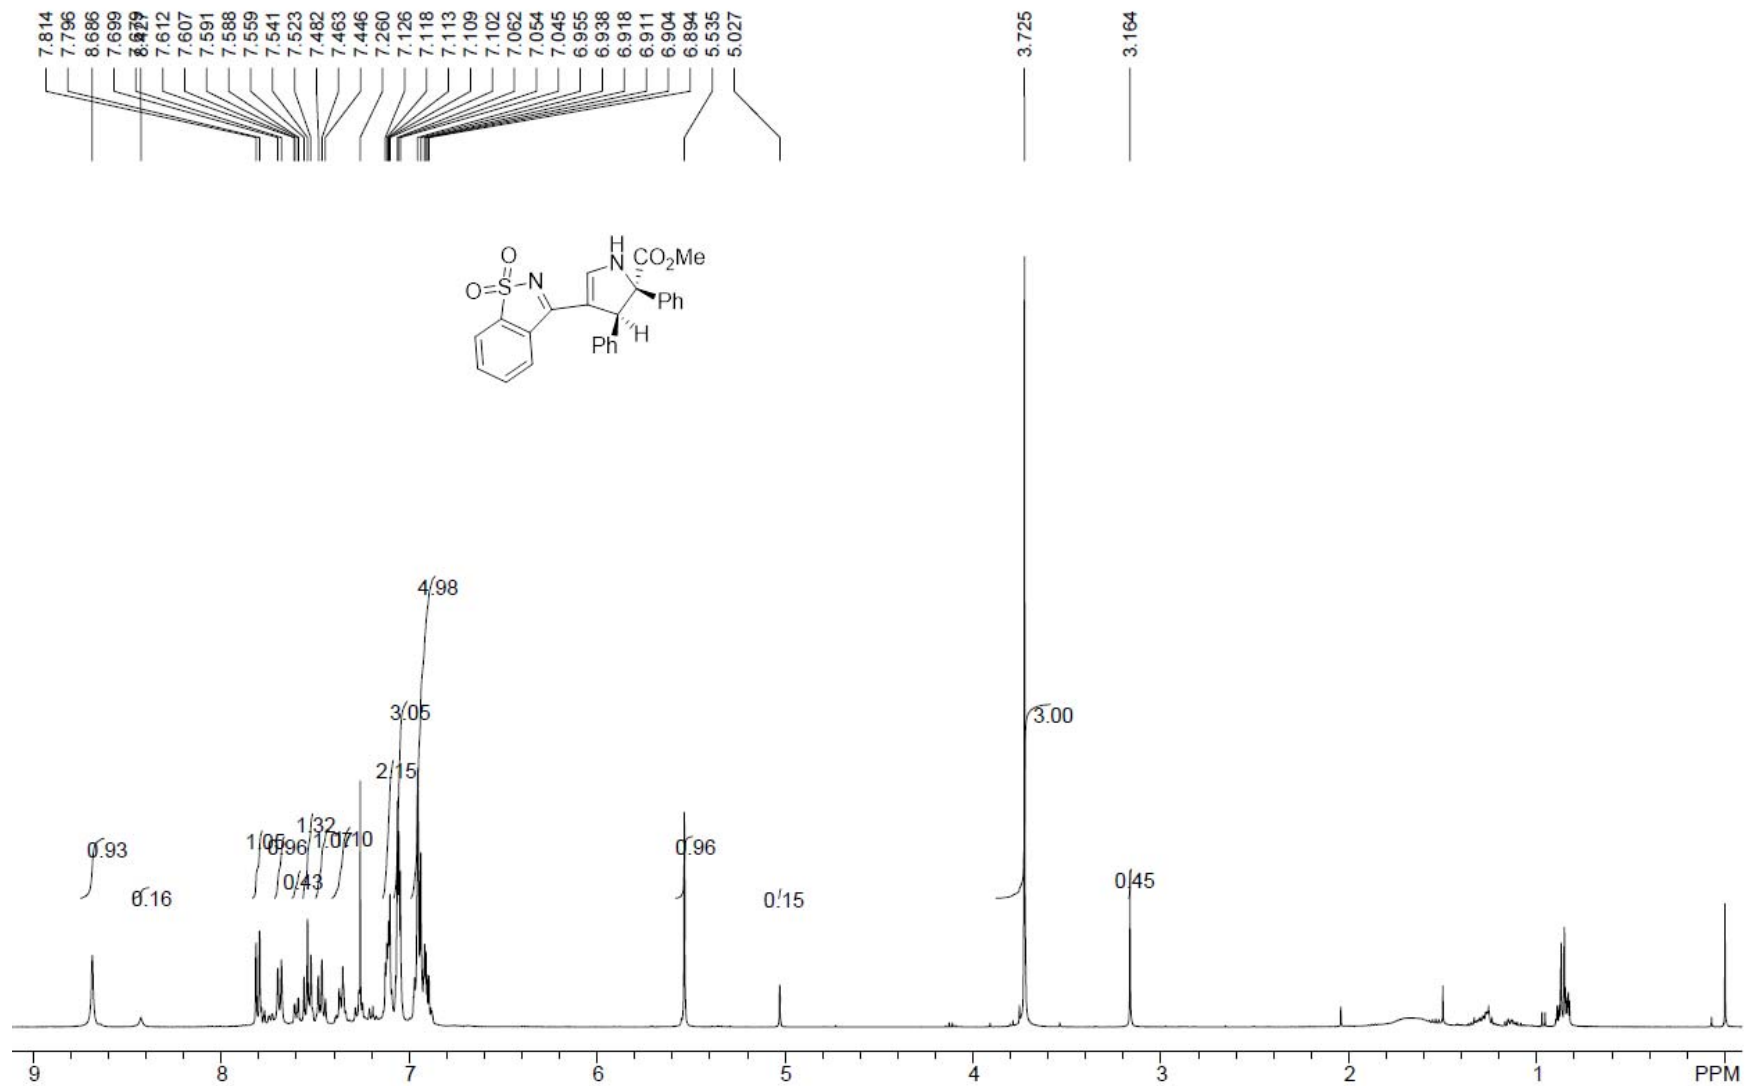

<sup>13</sup>C NMR of **4a**

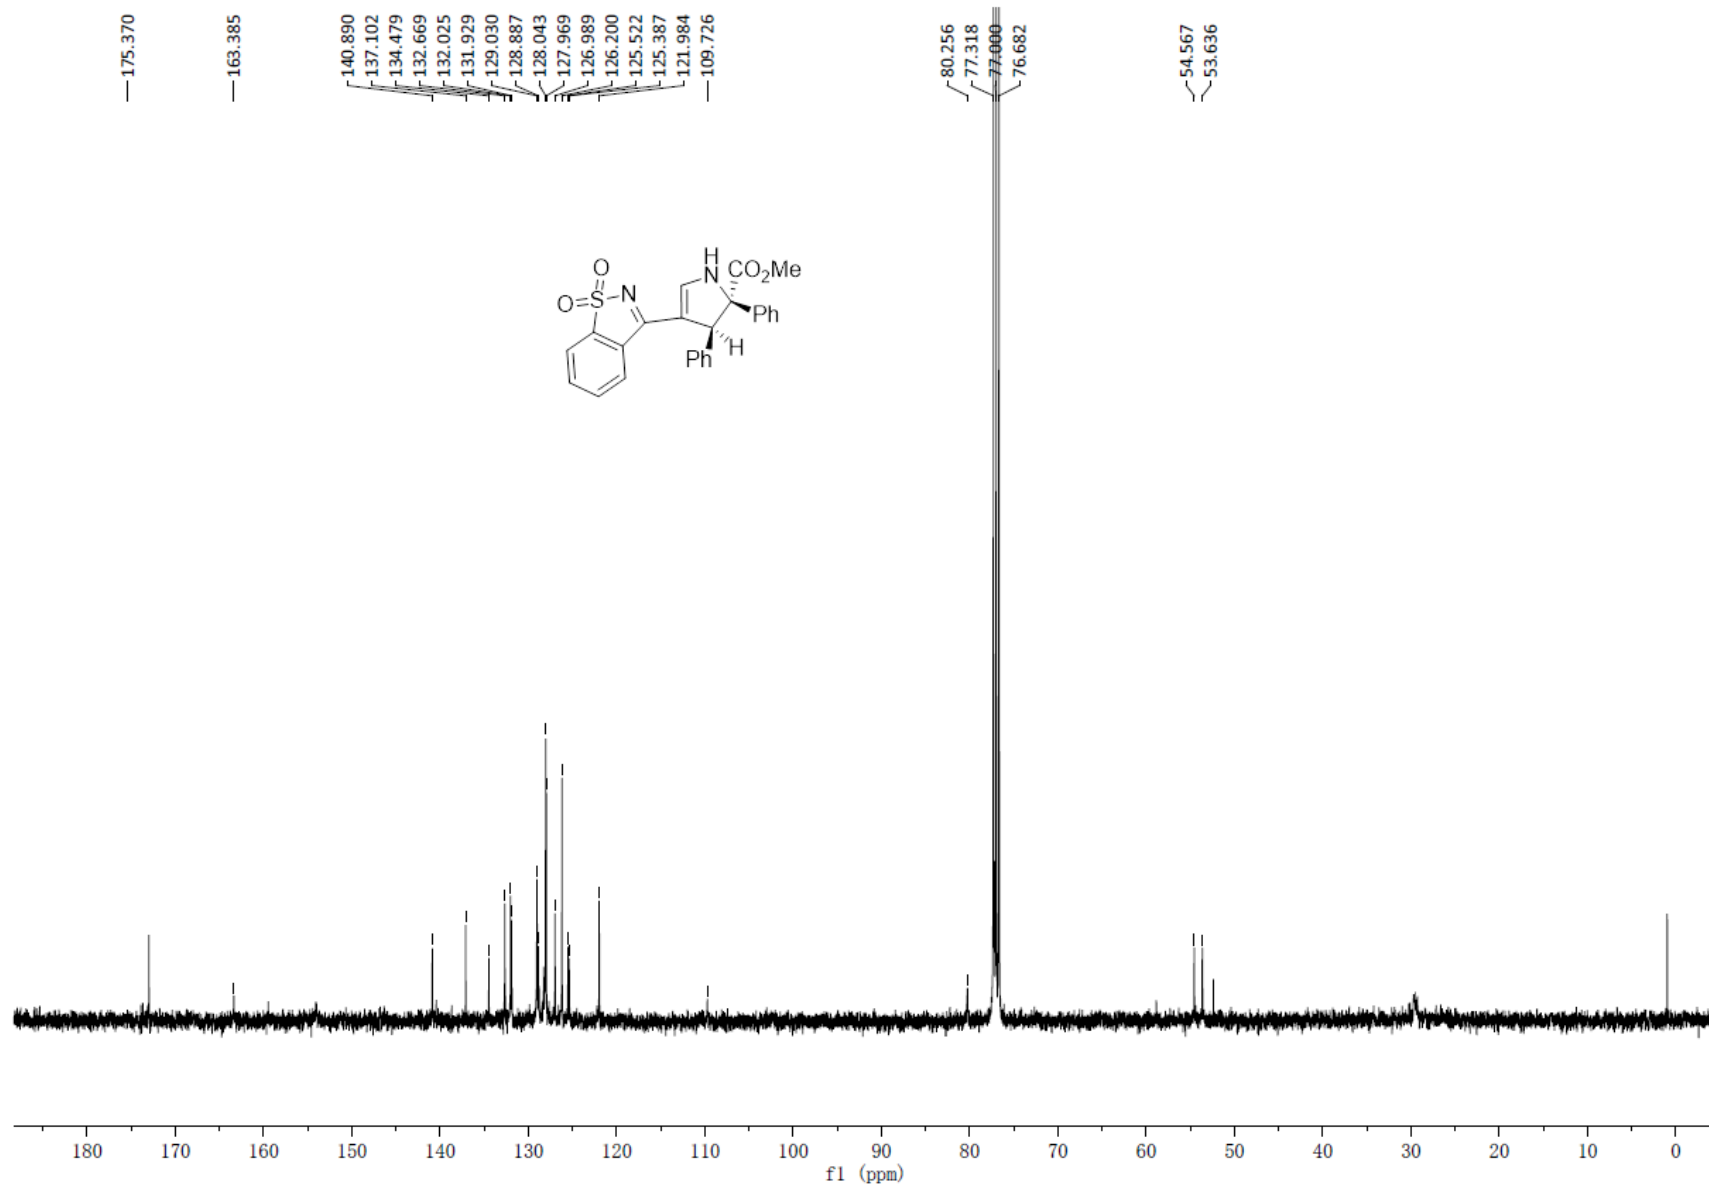

<sup>1</sup>H NMR of **4b**

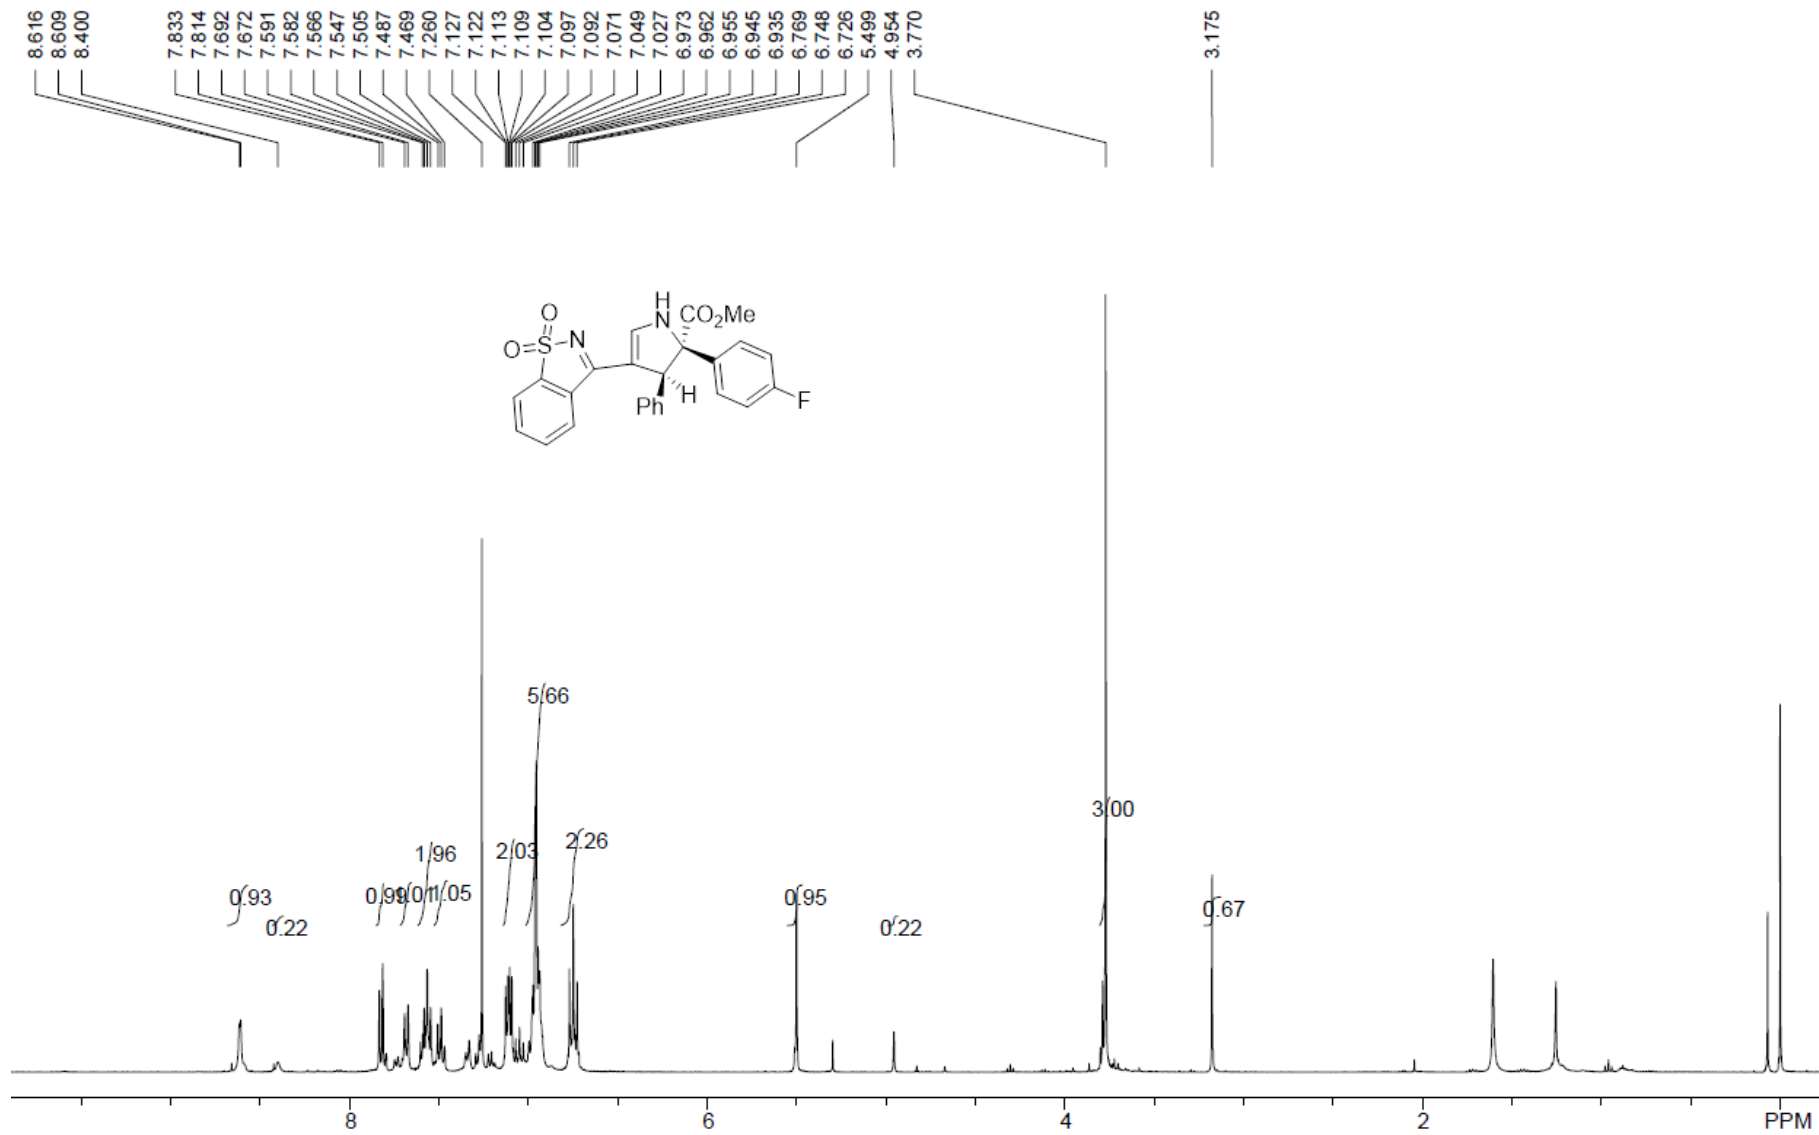

<sup>13</sup>C NMR of **4b**

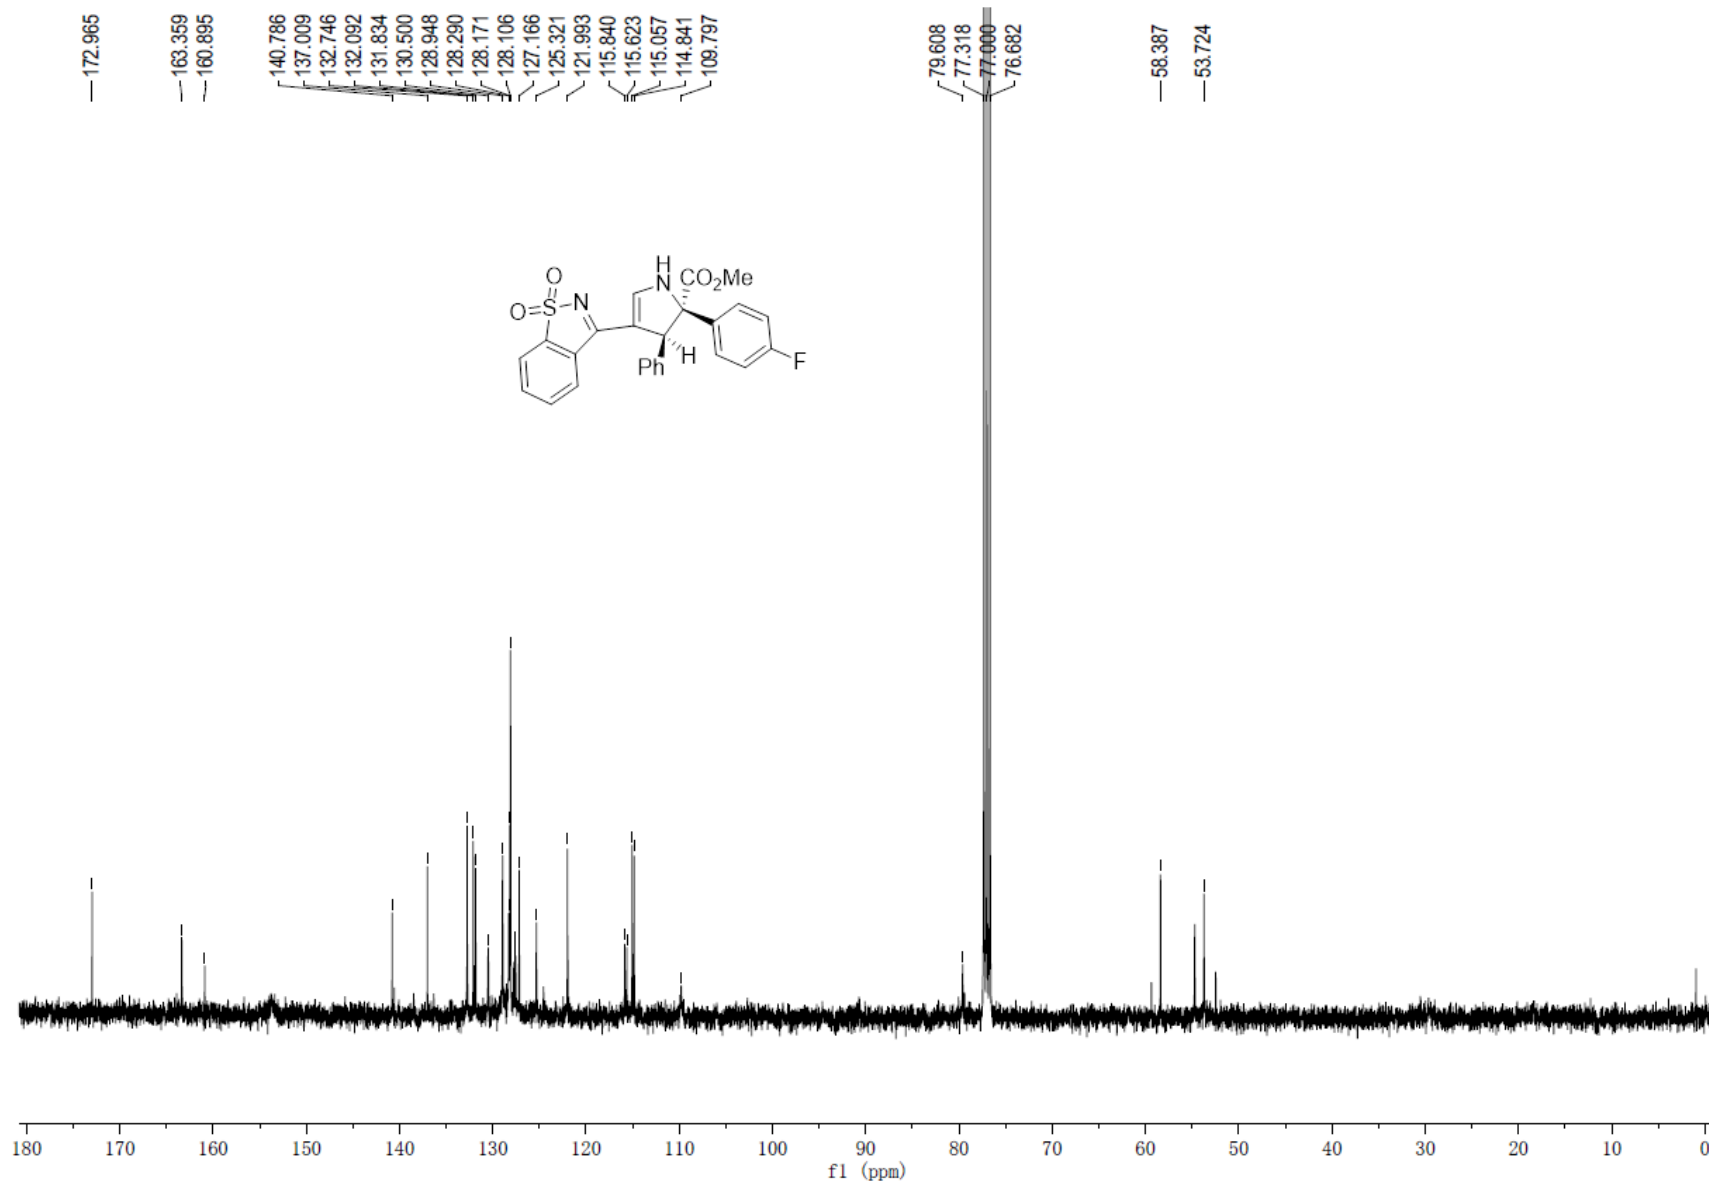



<sup>19</sup>F NMR of **4b**

112.761  
113.424

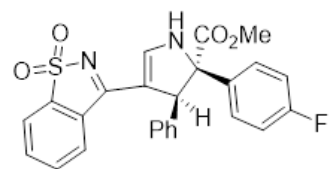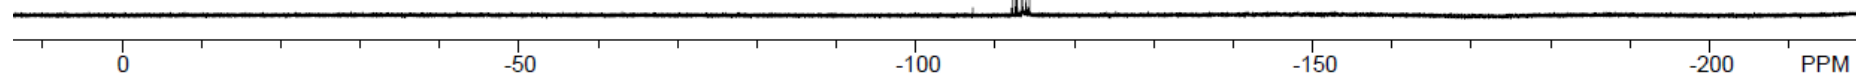

<sup>1</sup>H NMR of 4c

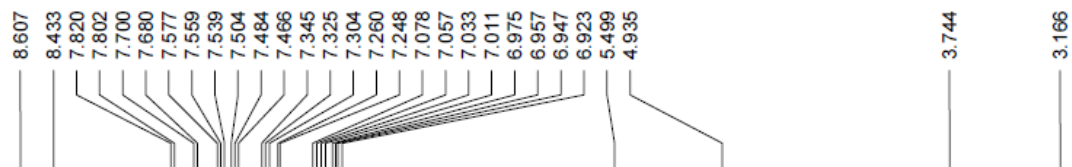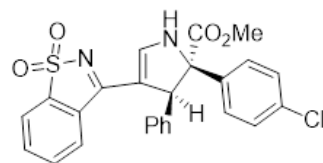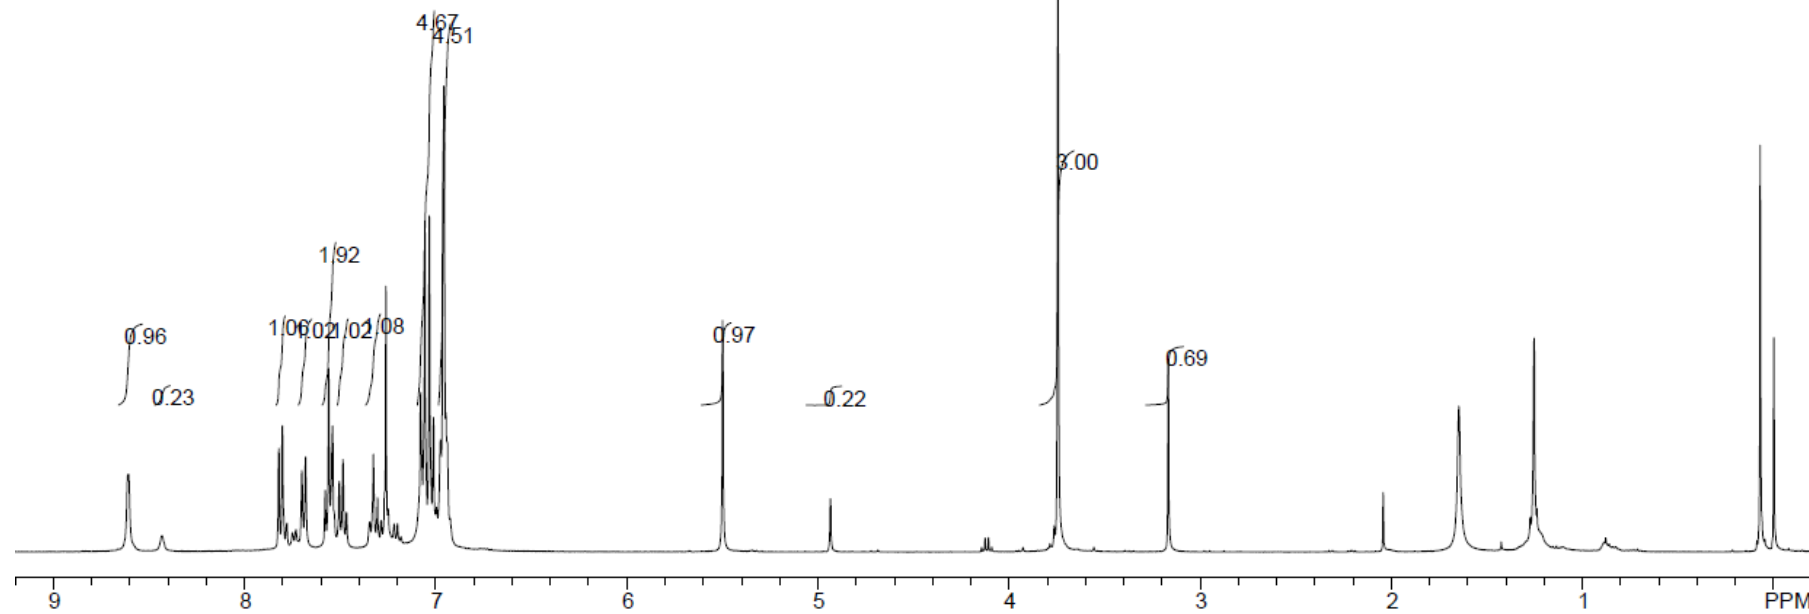

<sup>13</sup>C NMR of 4c

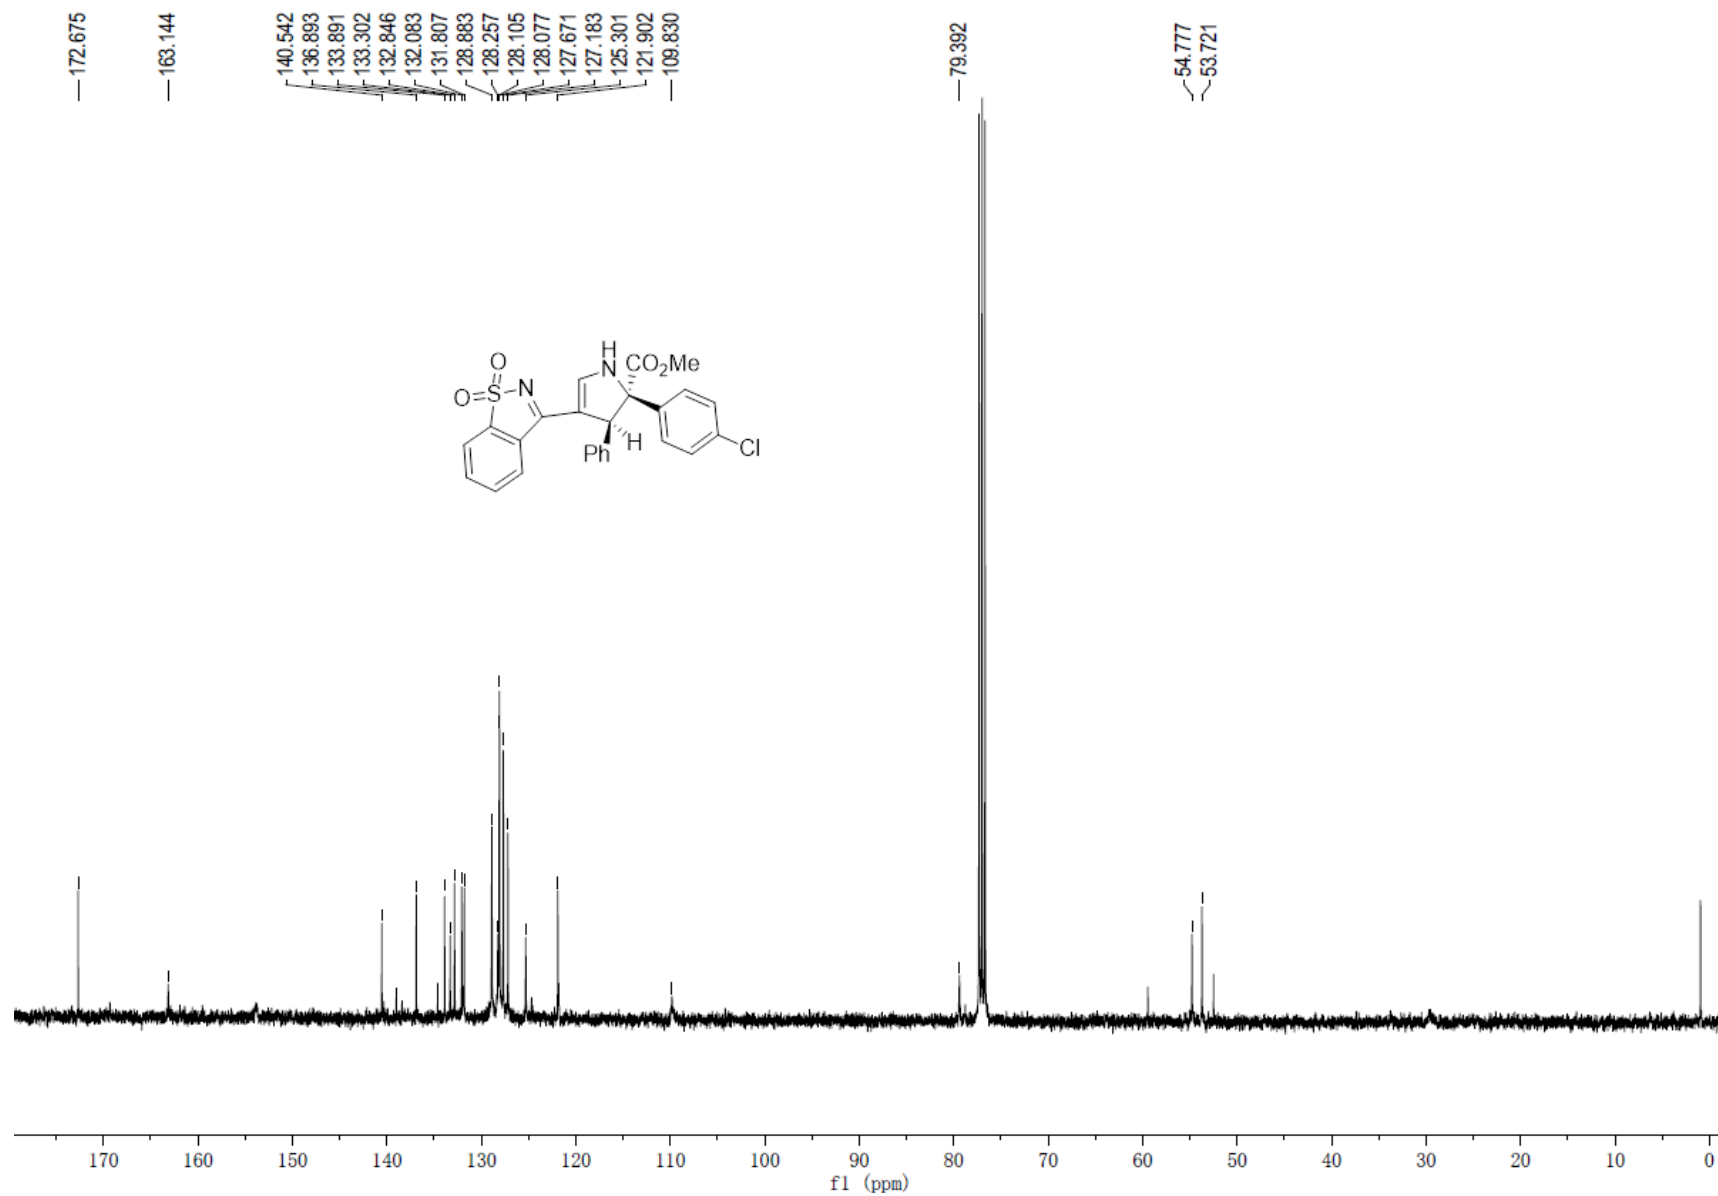

<sup>1</sup>H NMR of 4d

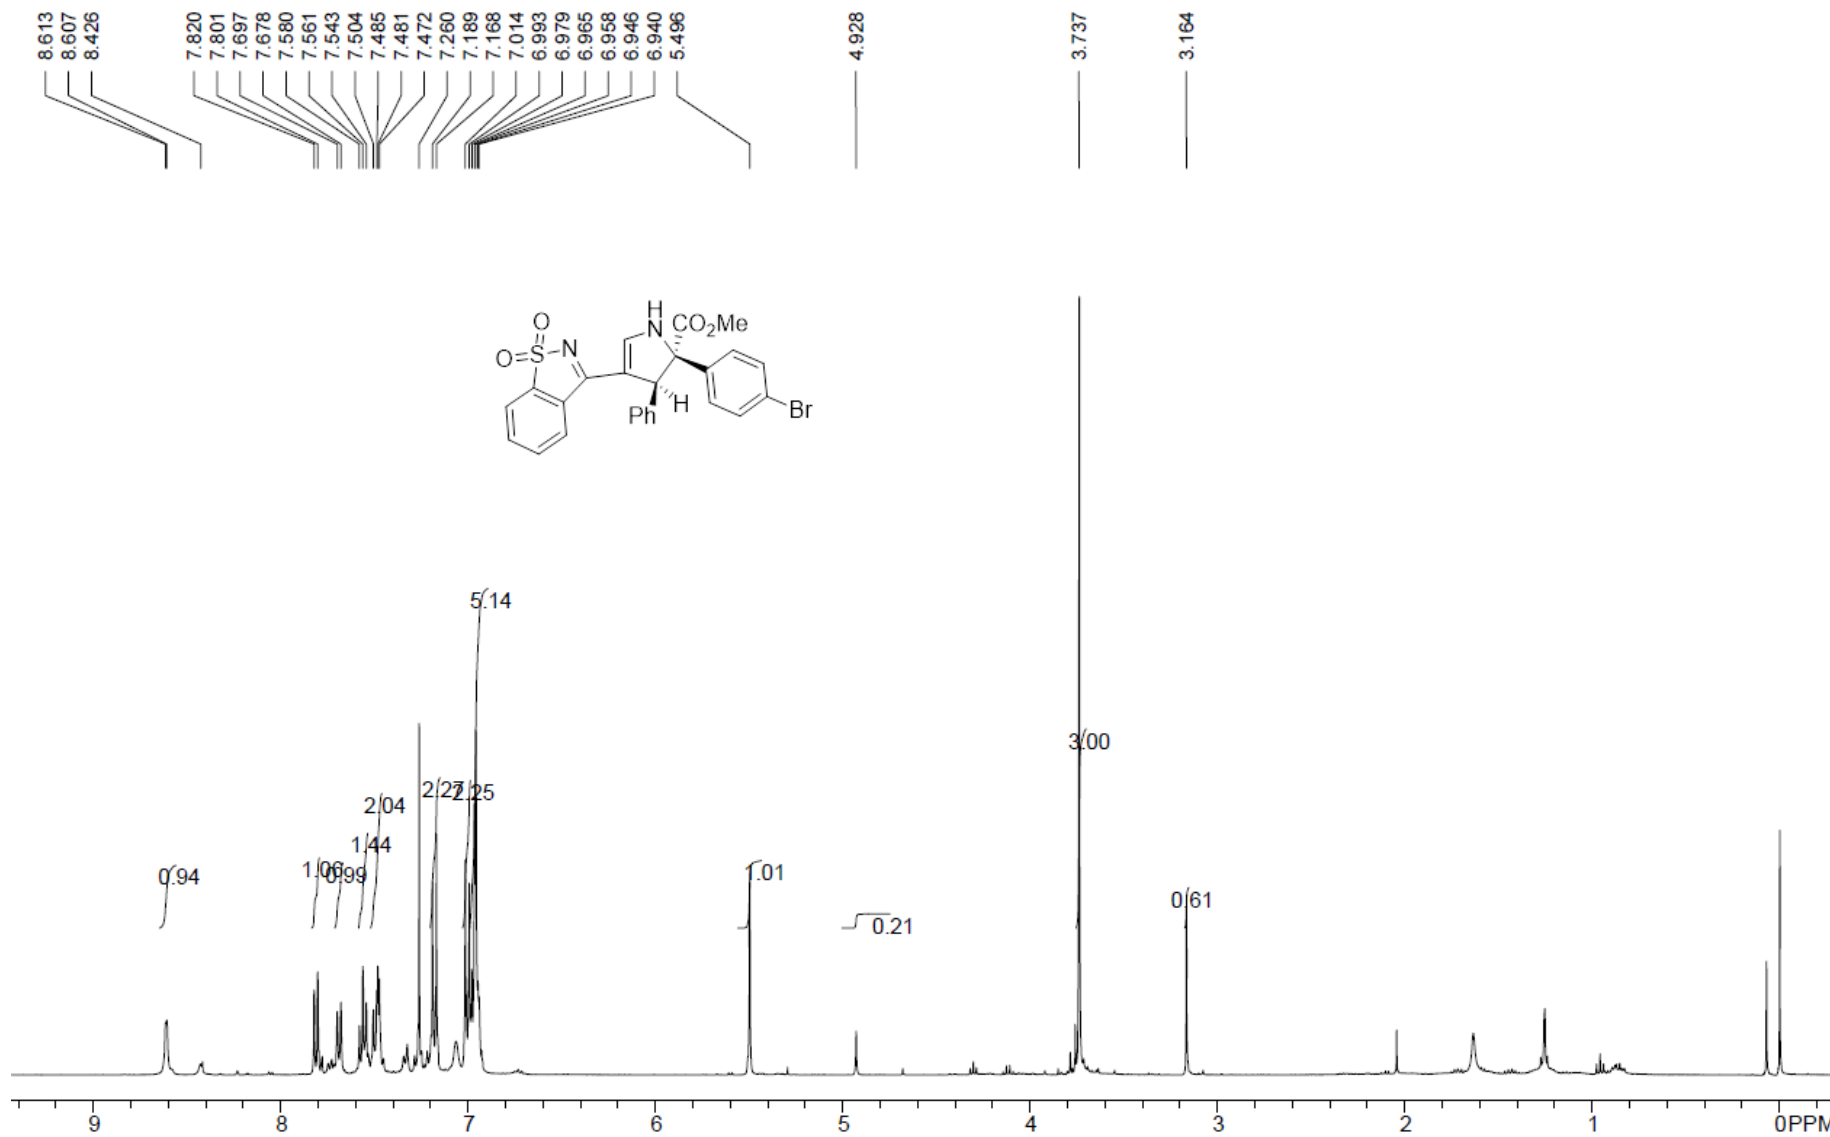

<sup>13</sup>C NMR of **4d**

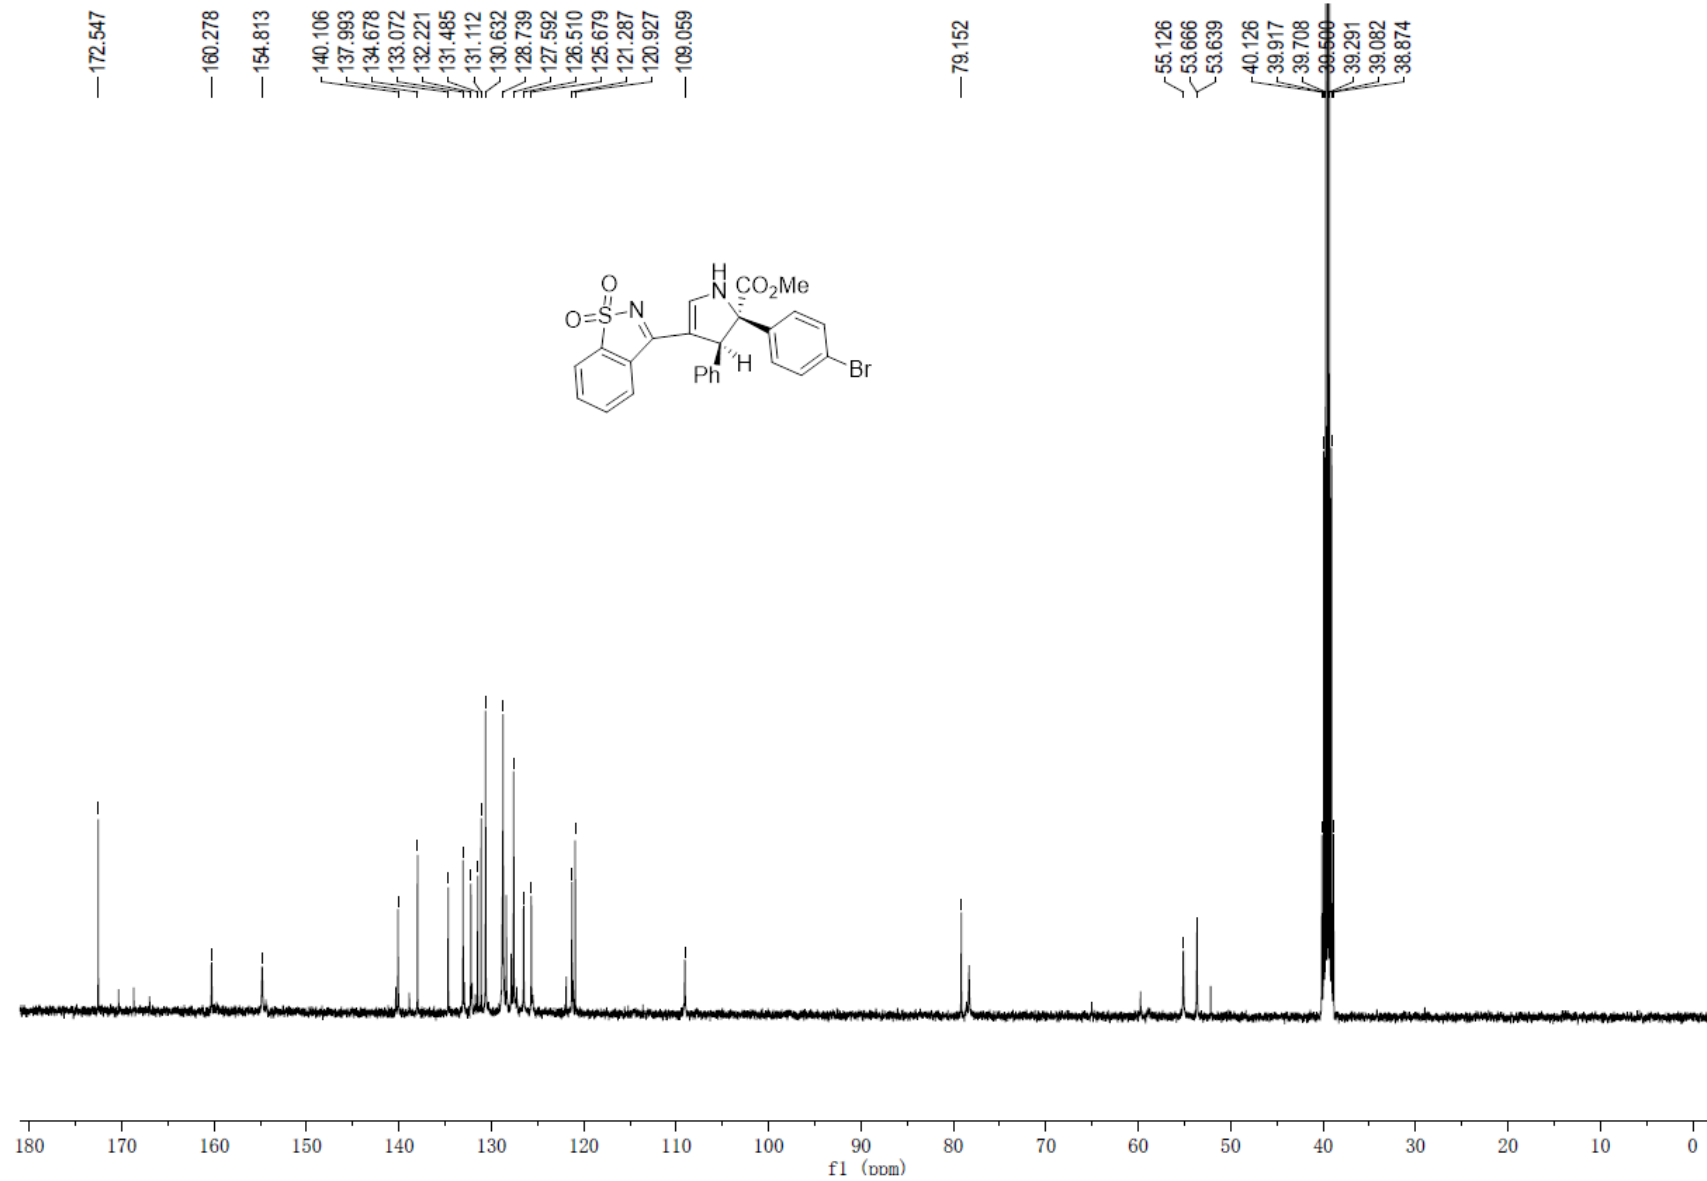

<sup>1</sup>H NMR of 4e

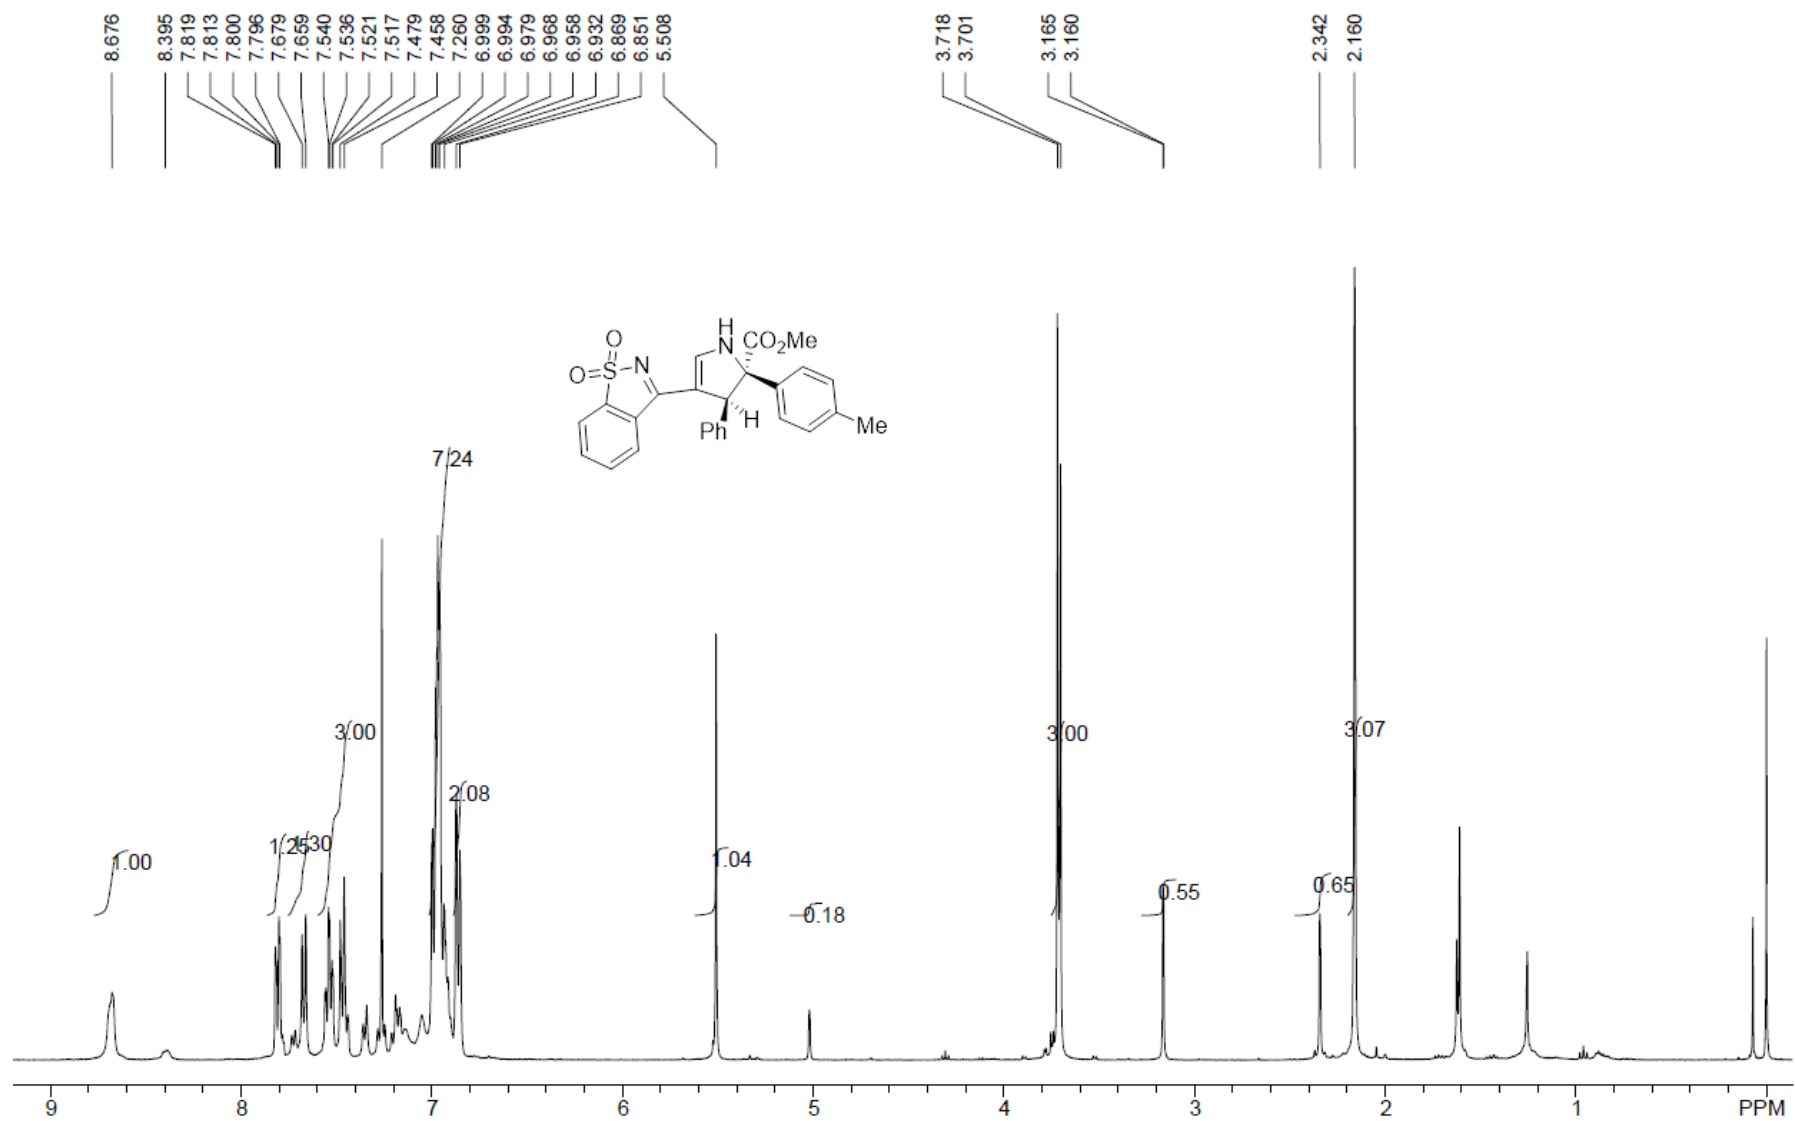

<sup>13</sup>C NMR of **4e**

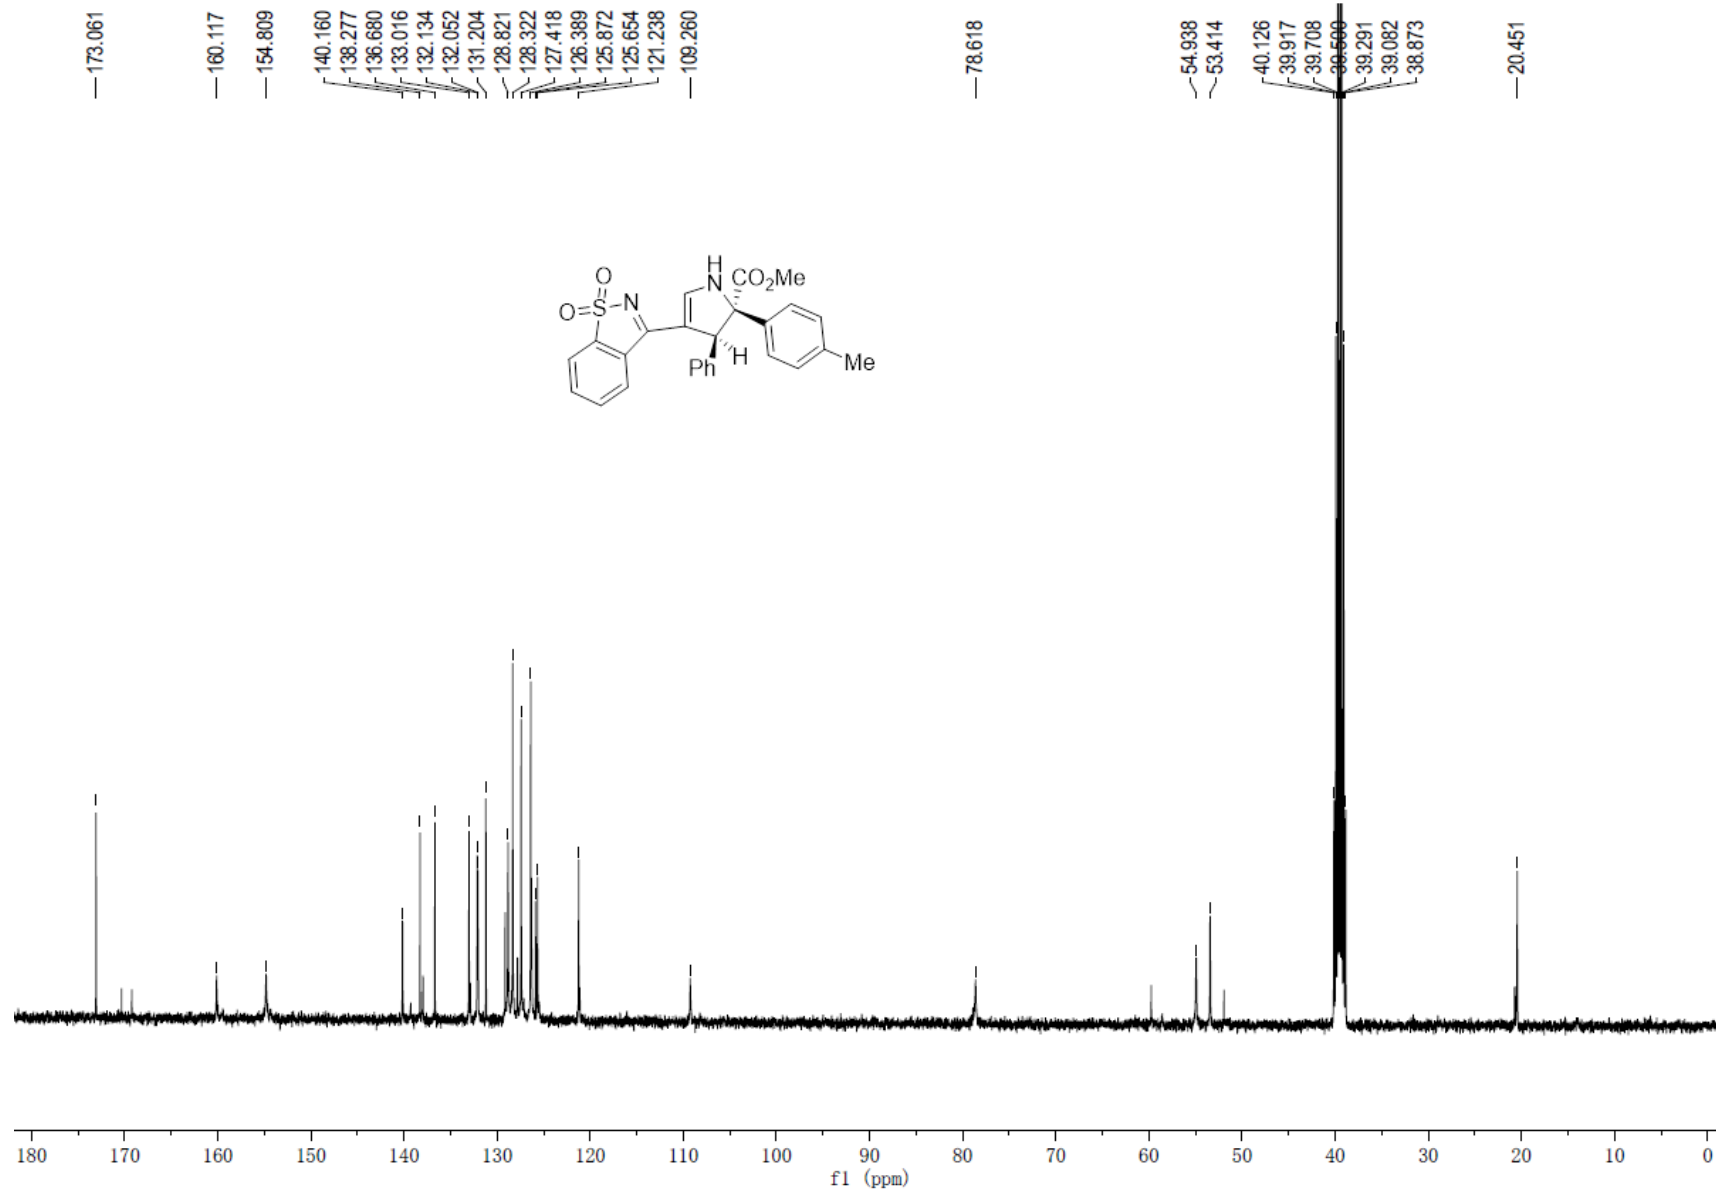

<sup>1</sup>H NMR of **4f**

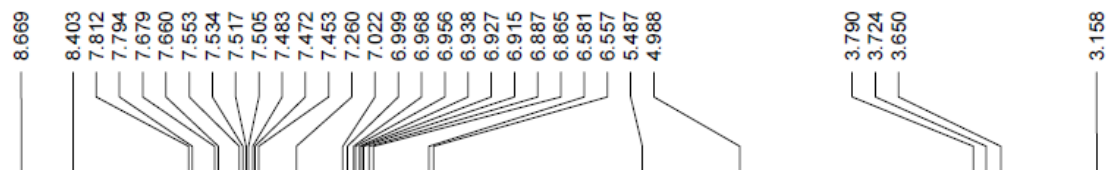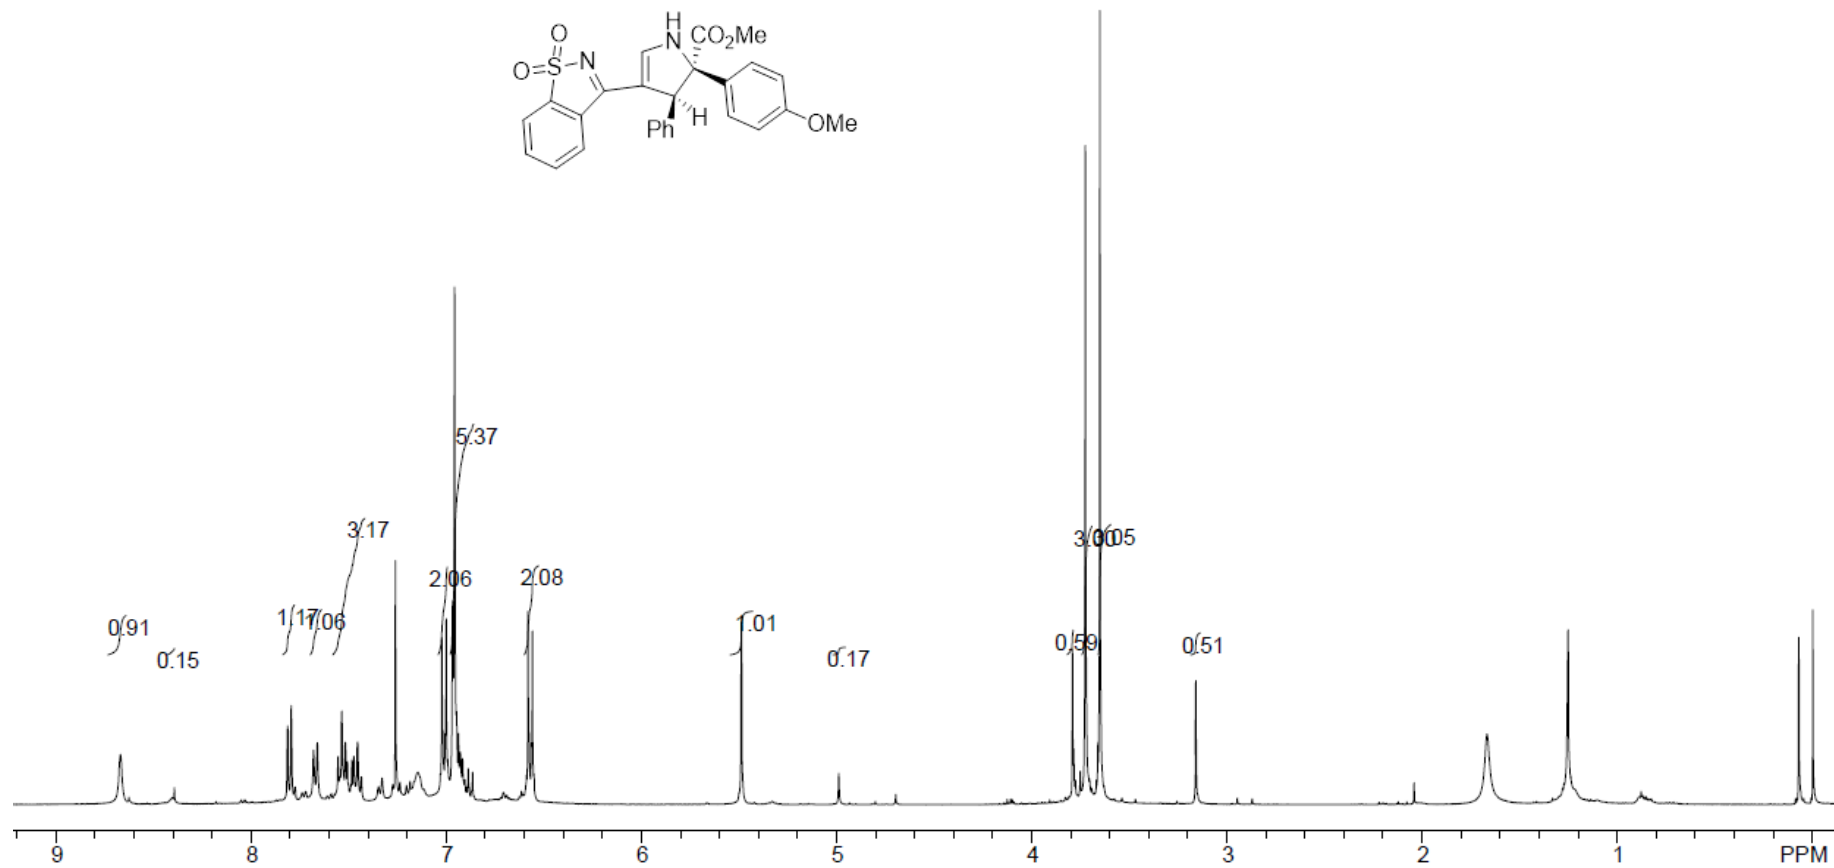



<sup>13</sup>C NMR of **4f**

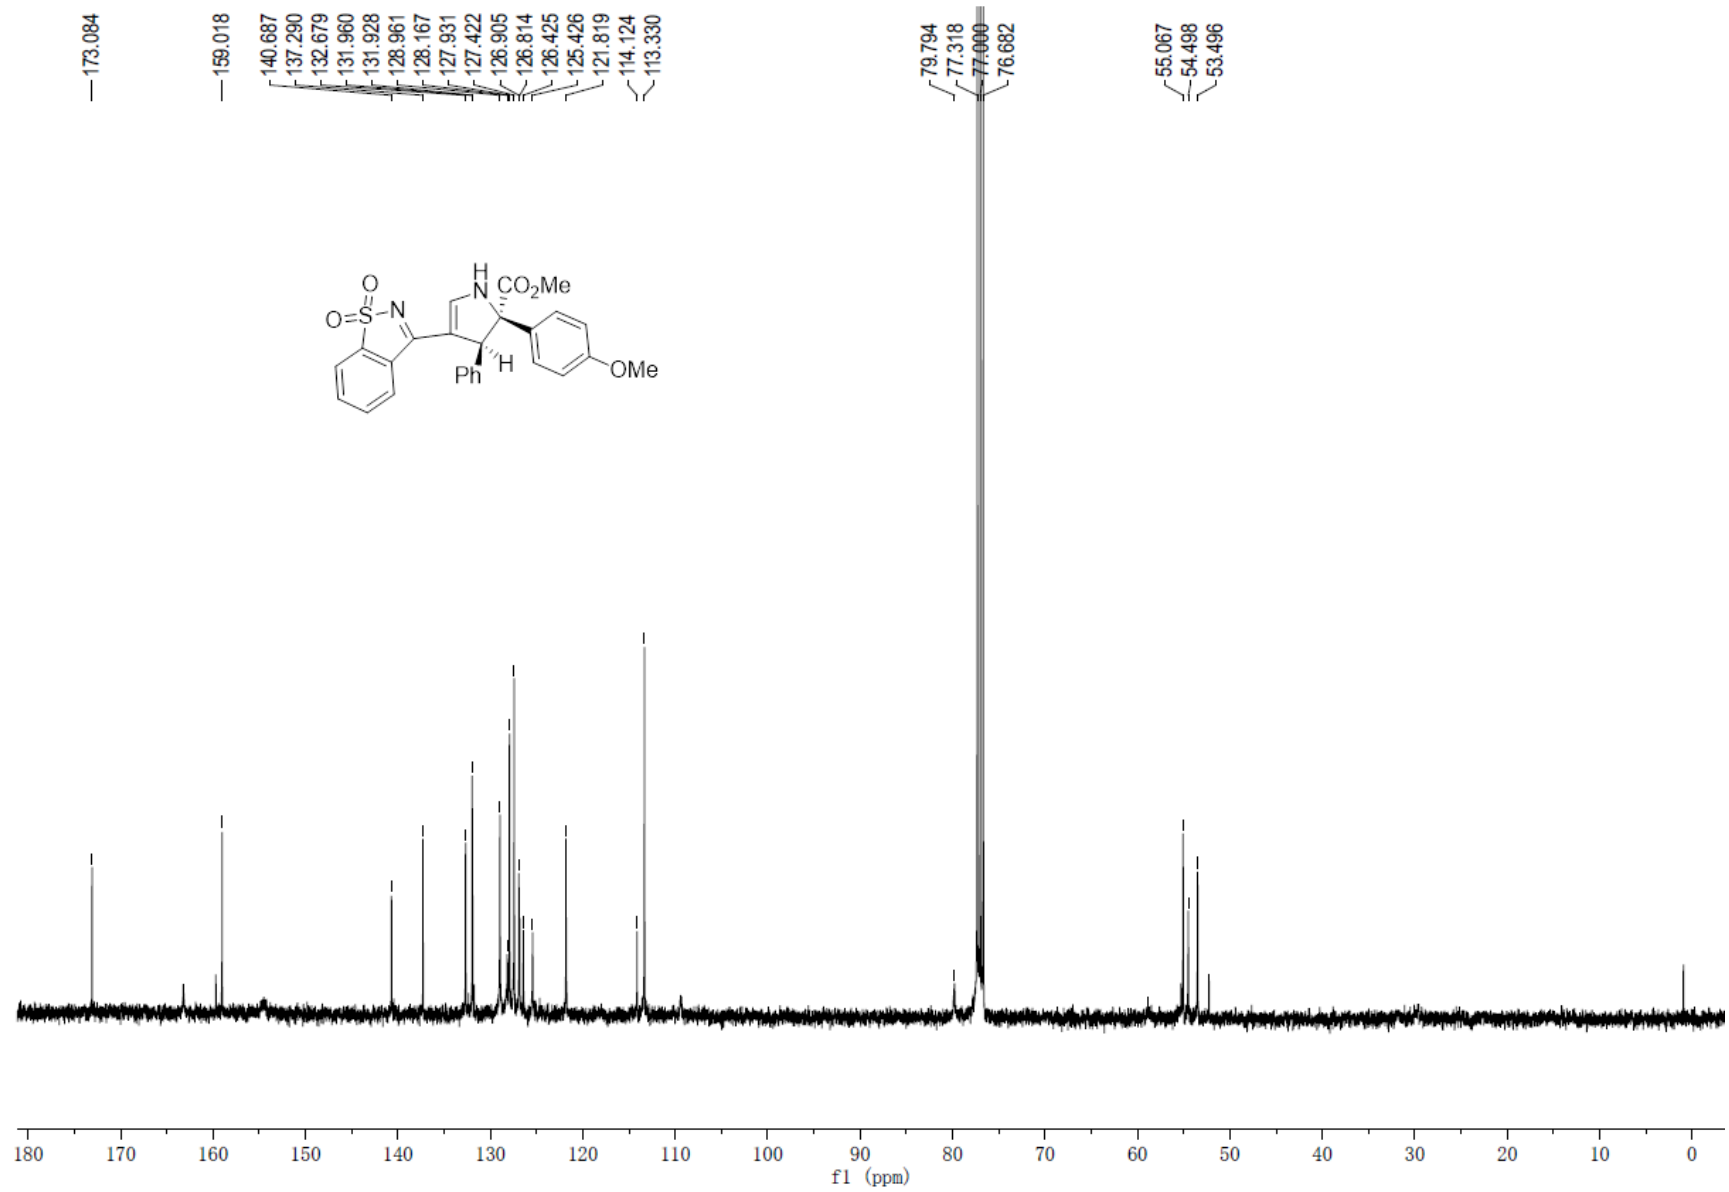

<sup>1</sup>H NMR of 4g

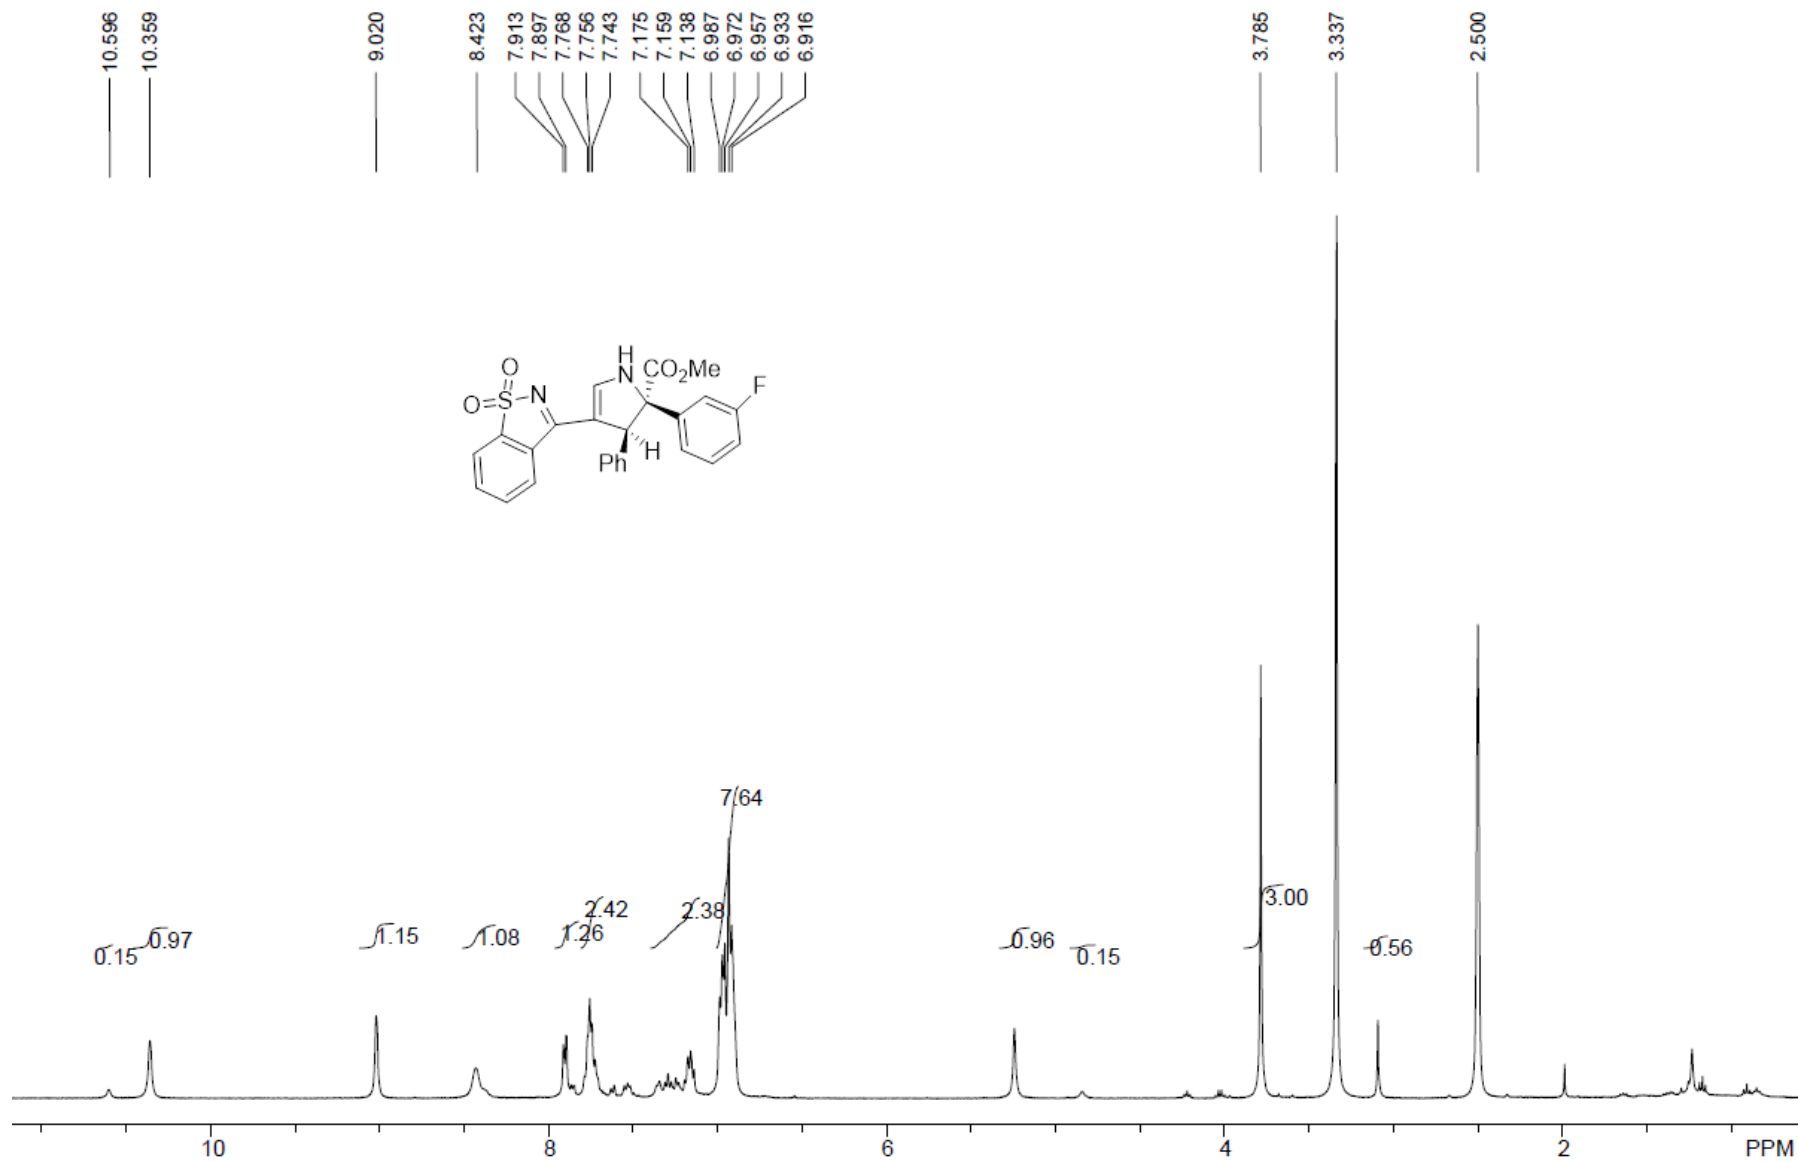

<sup>13</sup>C NMR of **4g**

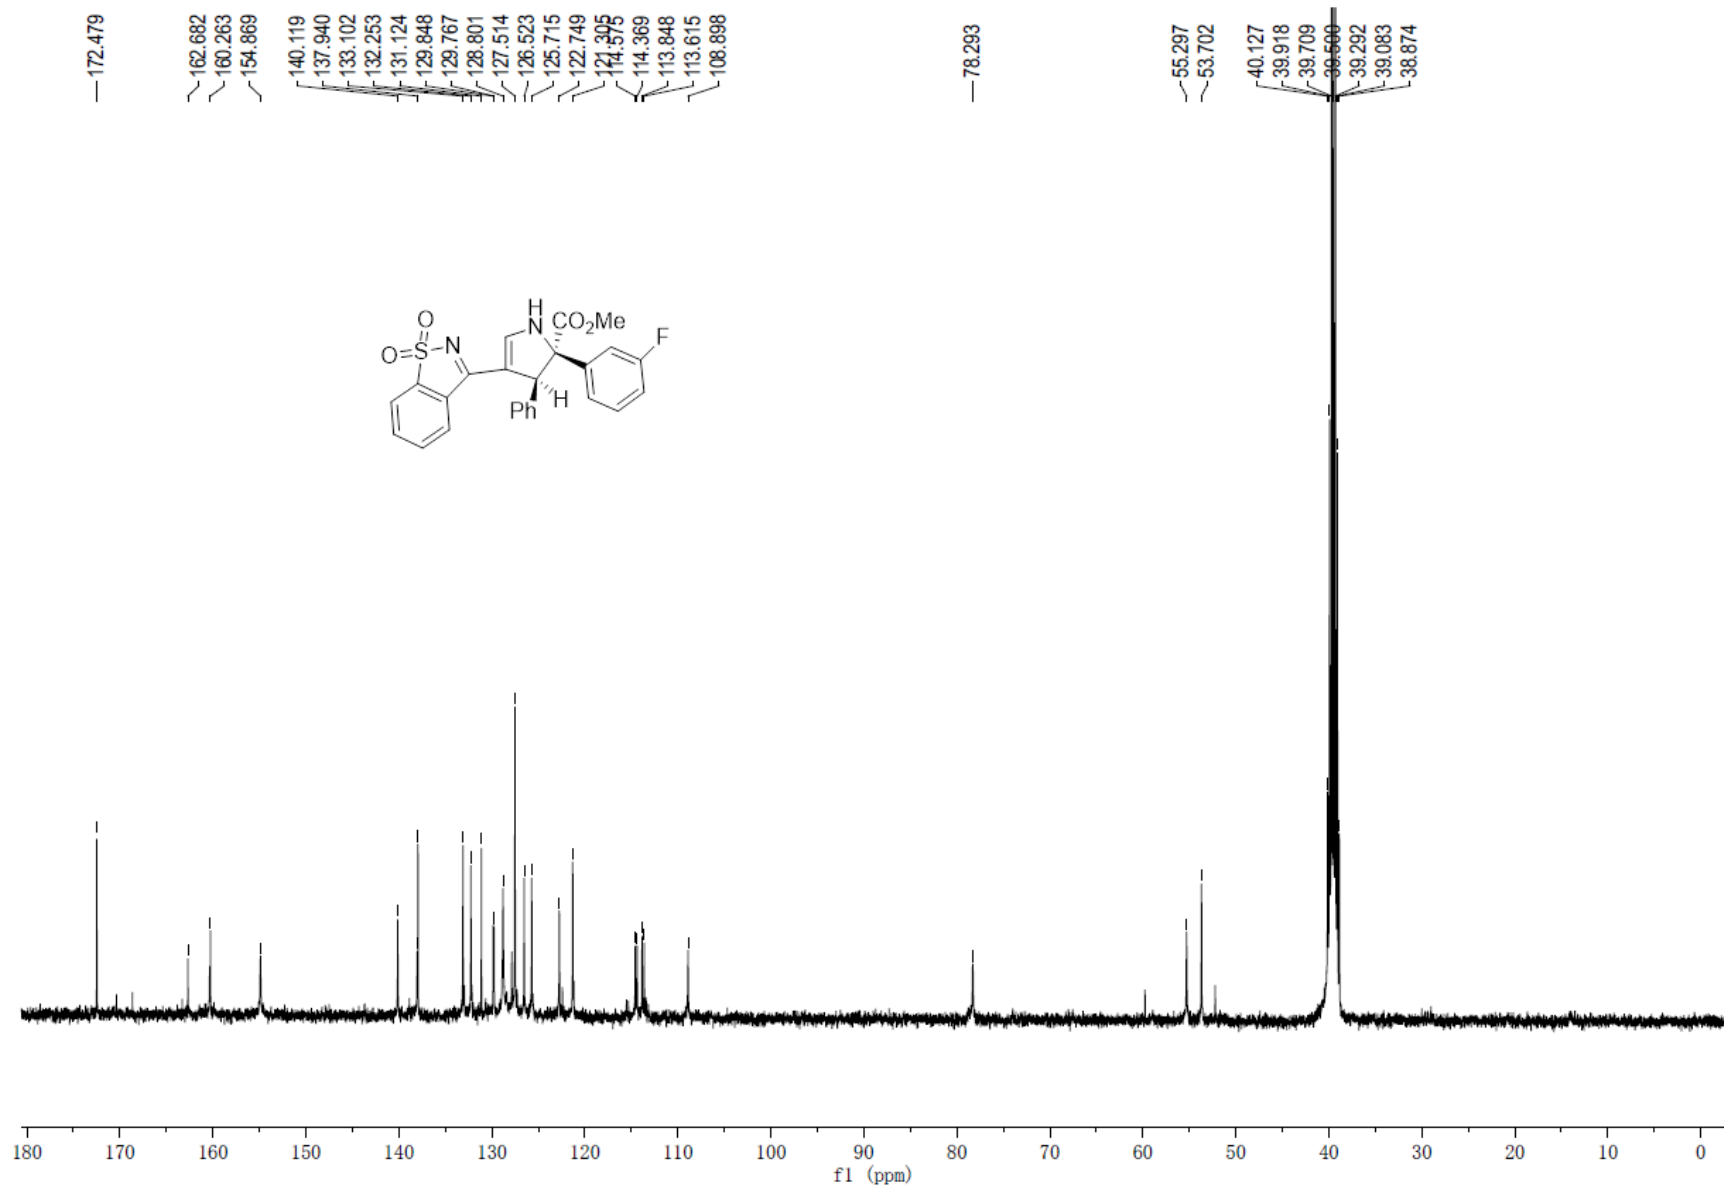

<sup>19</sup>F NMR of 4g

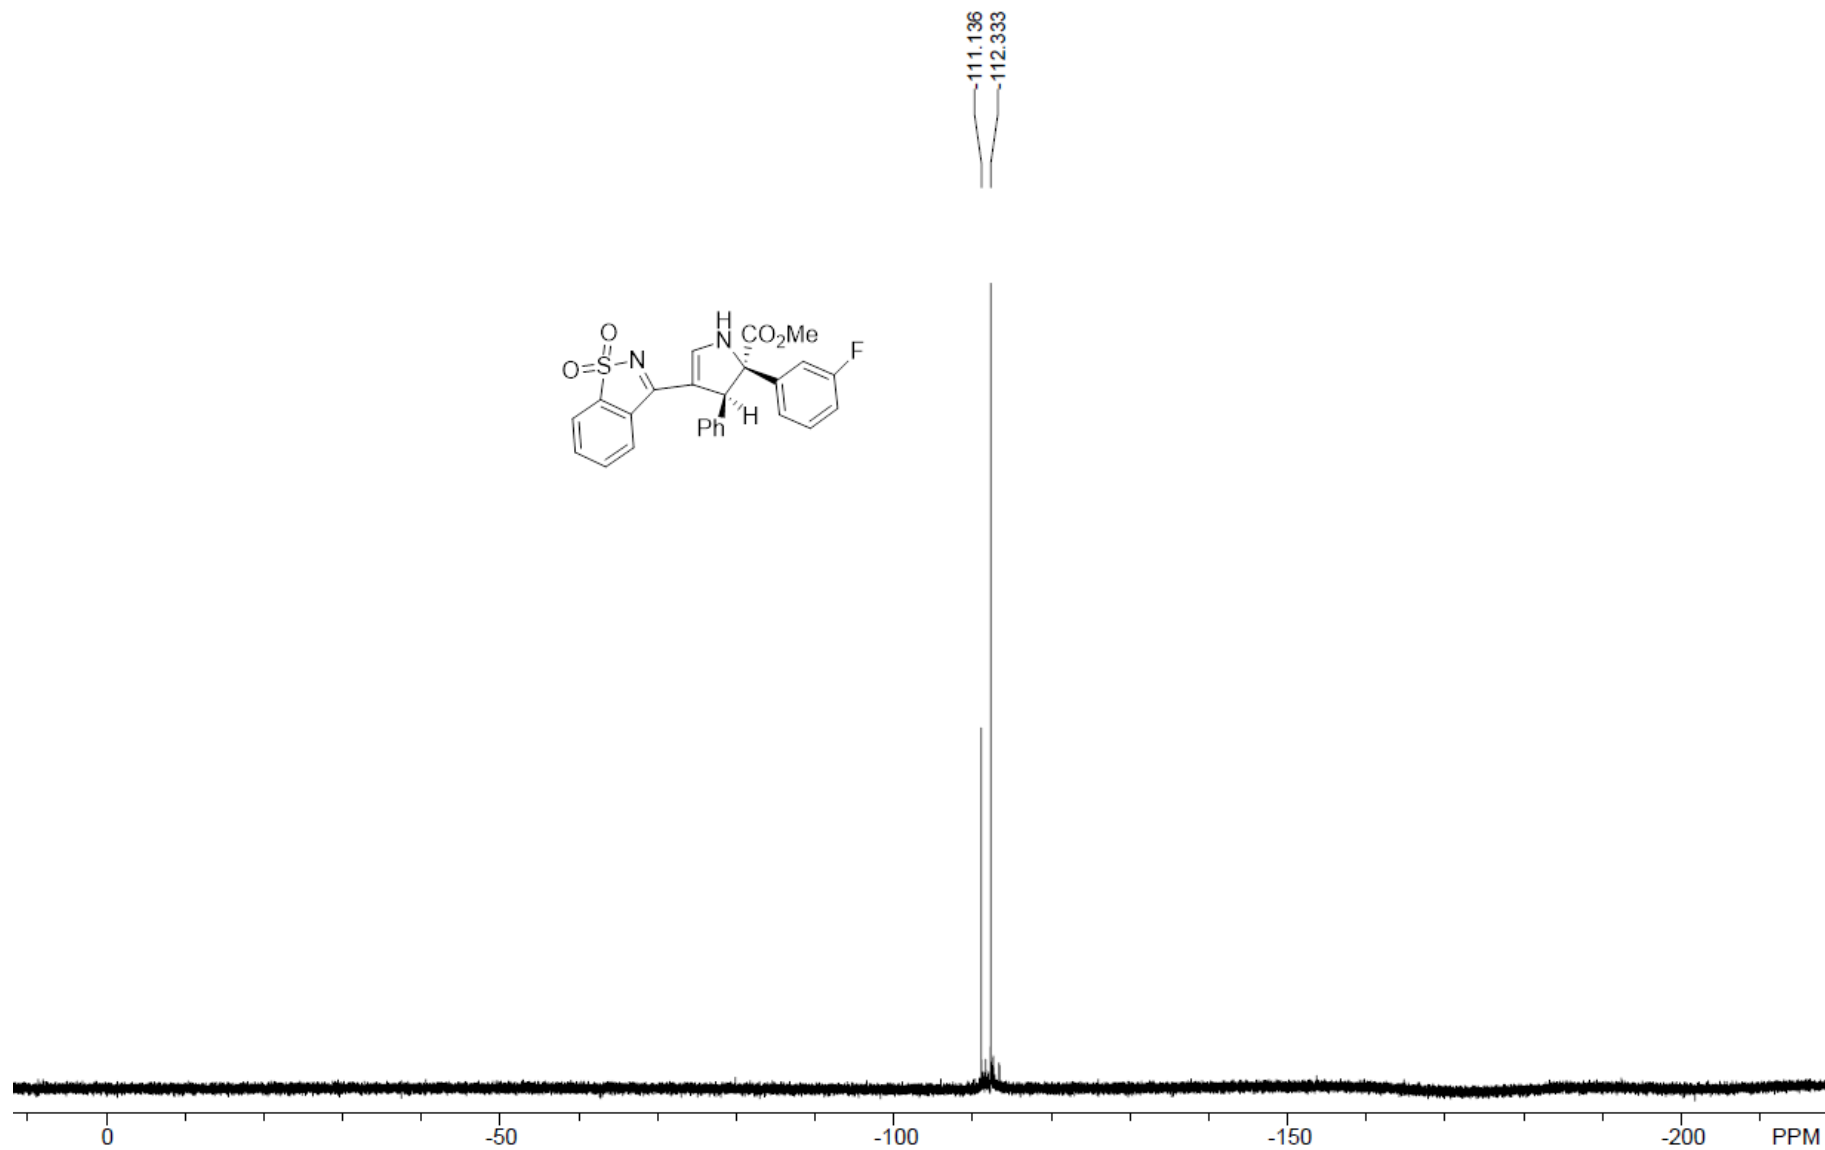

<sup>1</sup>H NMR of **4h**

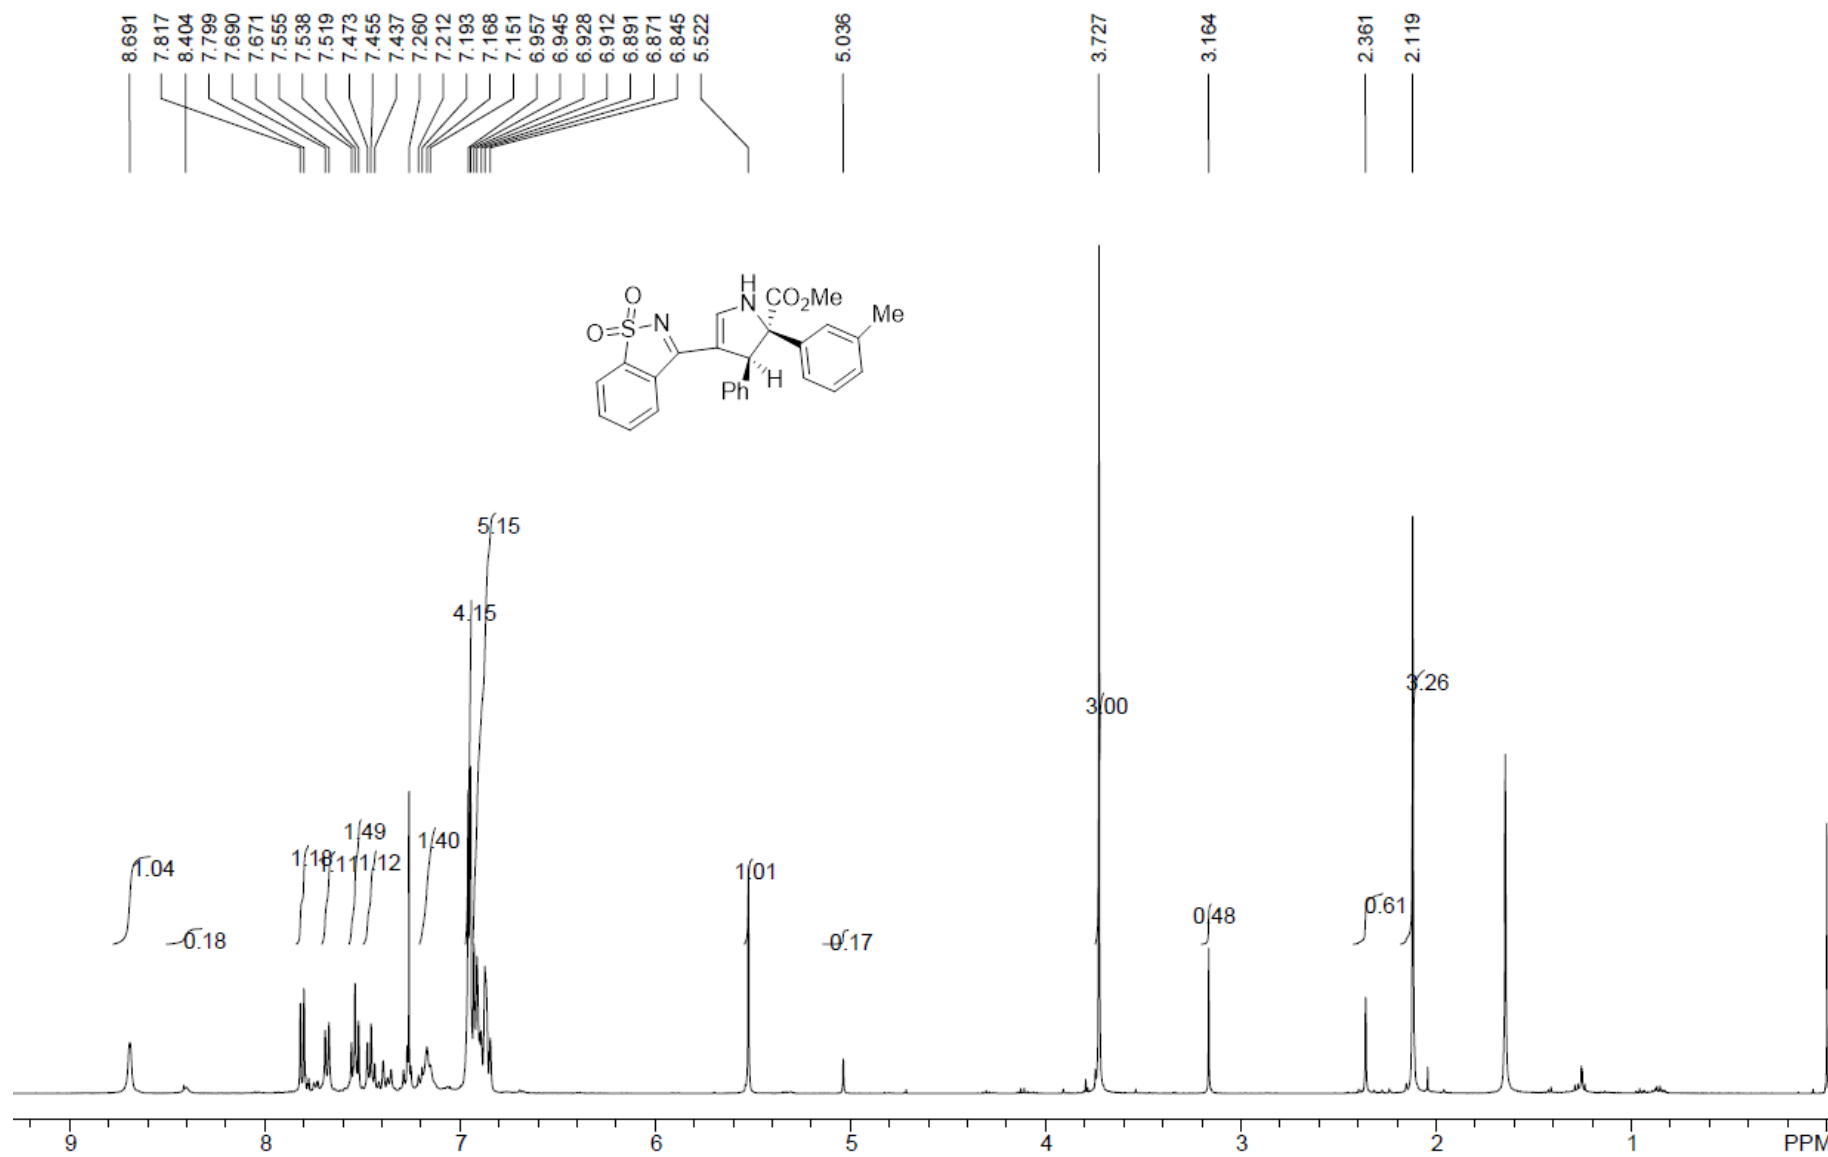

<sup>13</sup>C NMR of **4h**

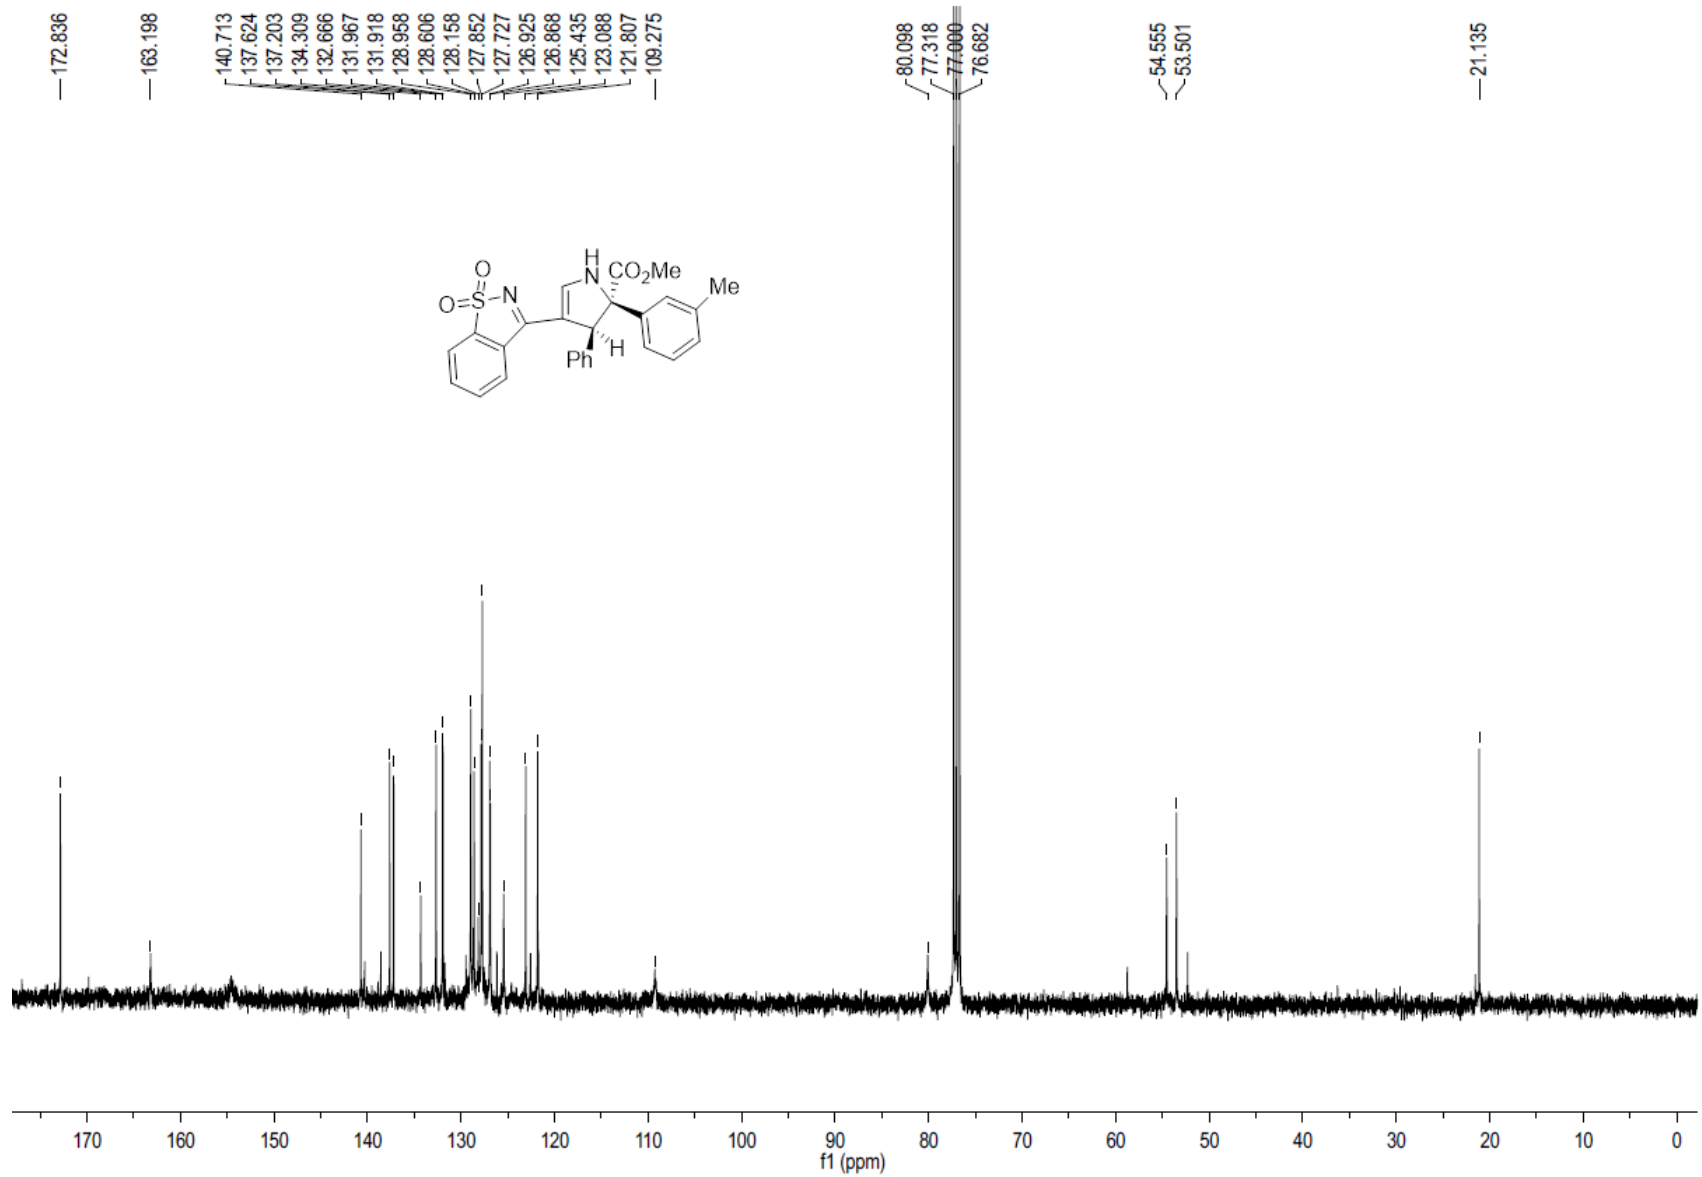

<sup>1</sup>H NMR of 4i

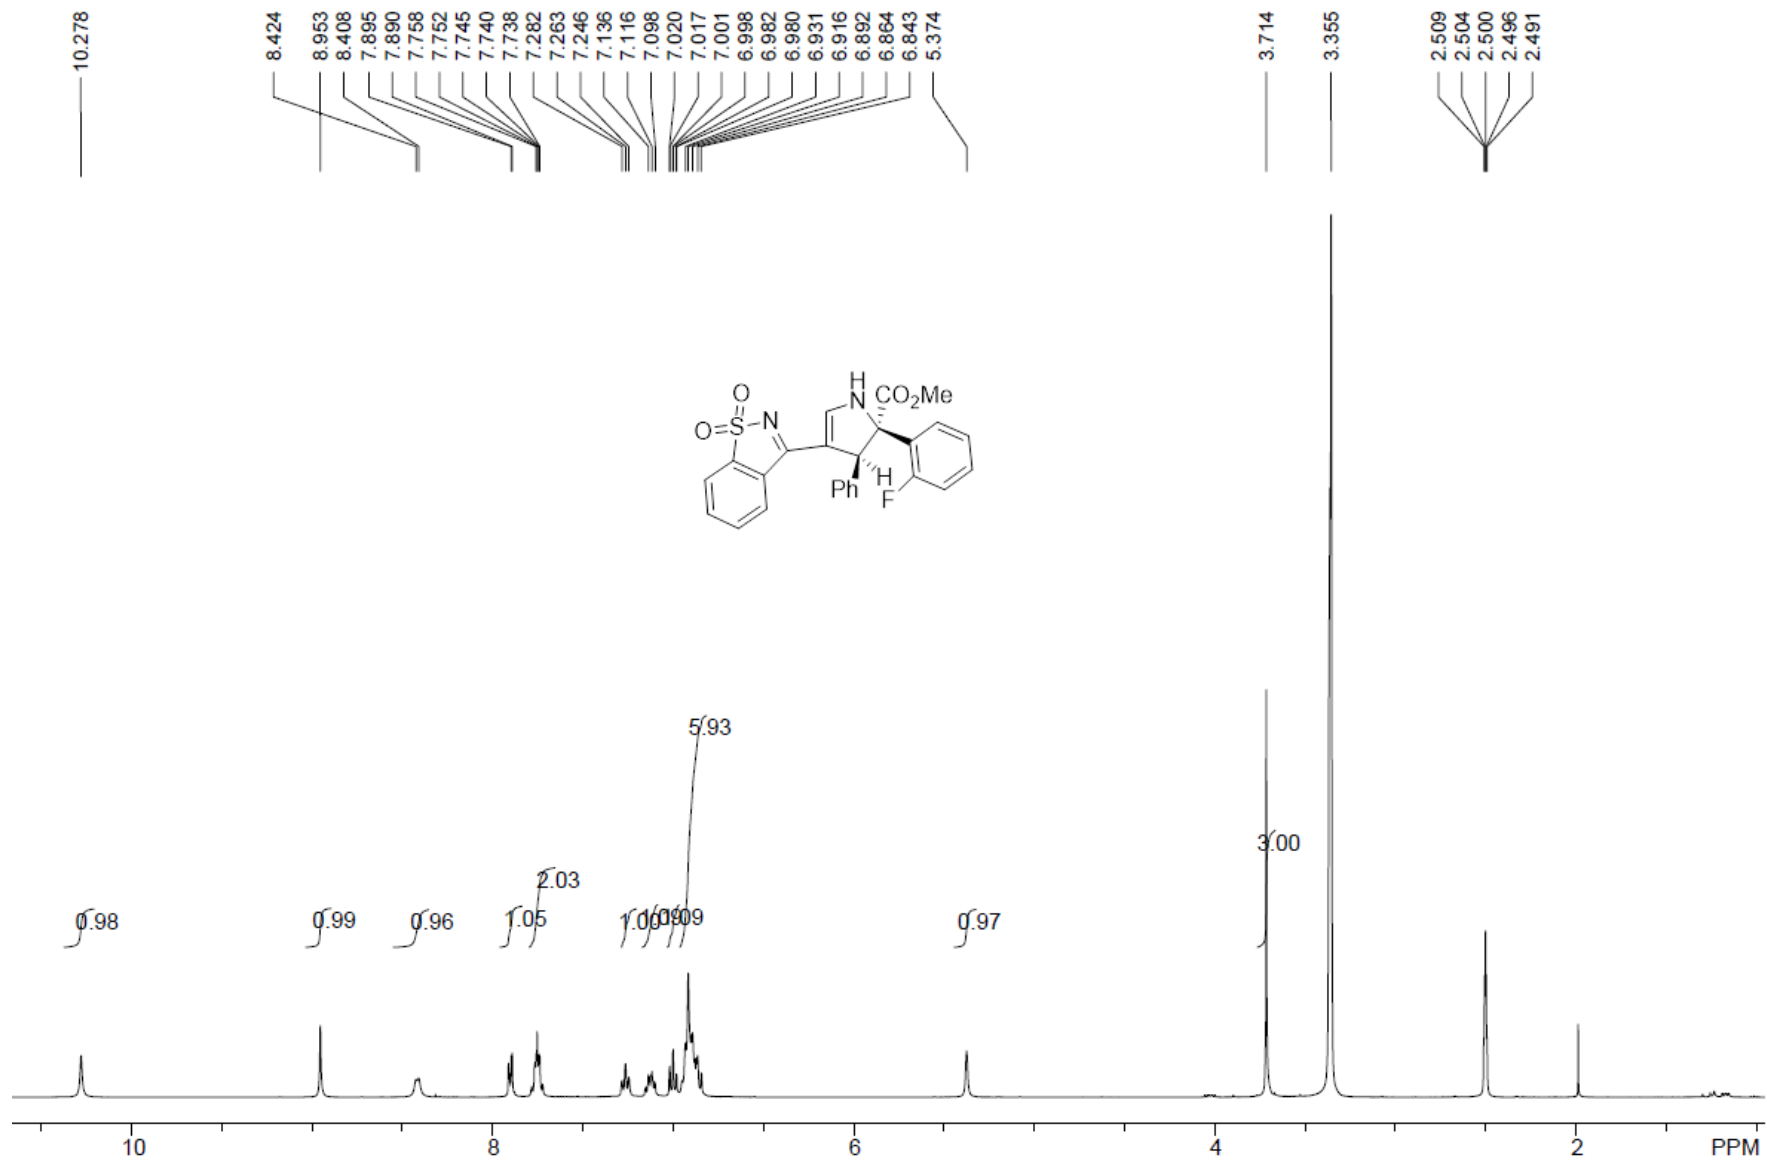

<sup>13</sup>C NMR of **4i**

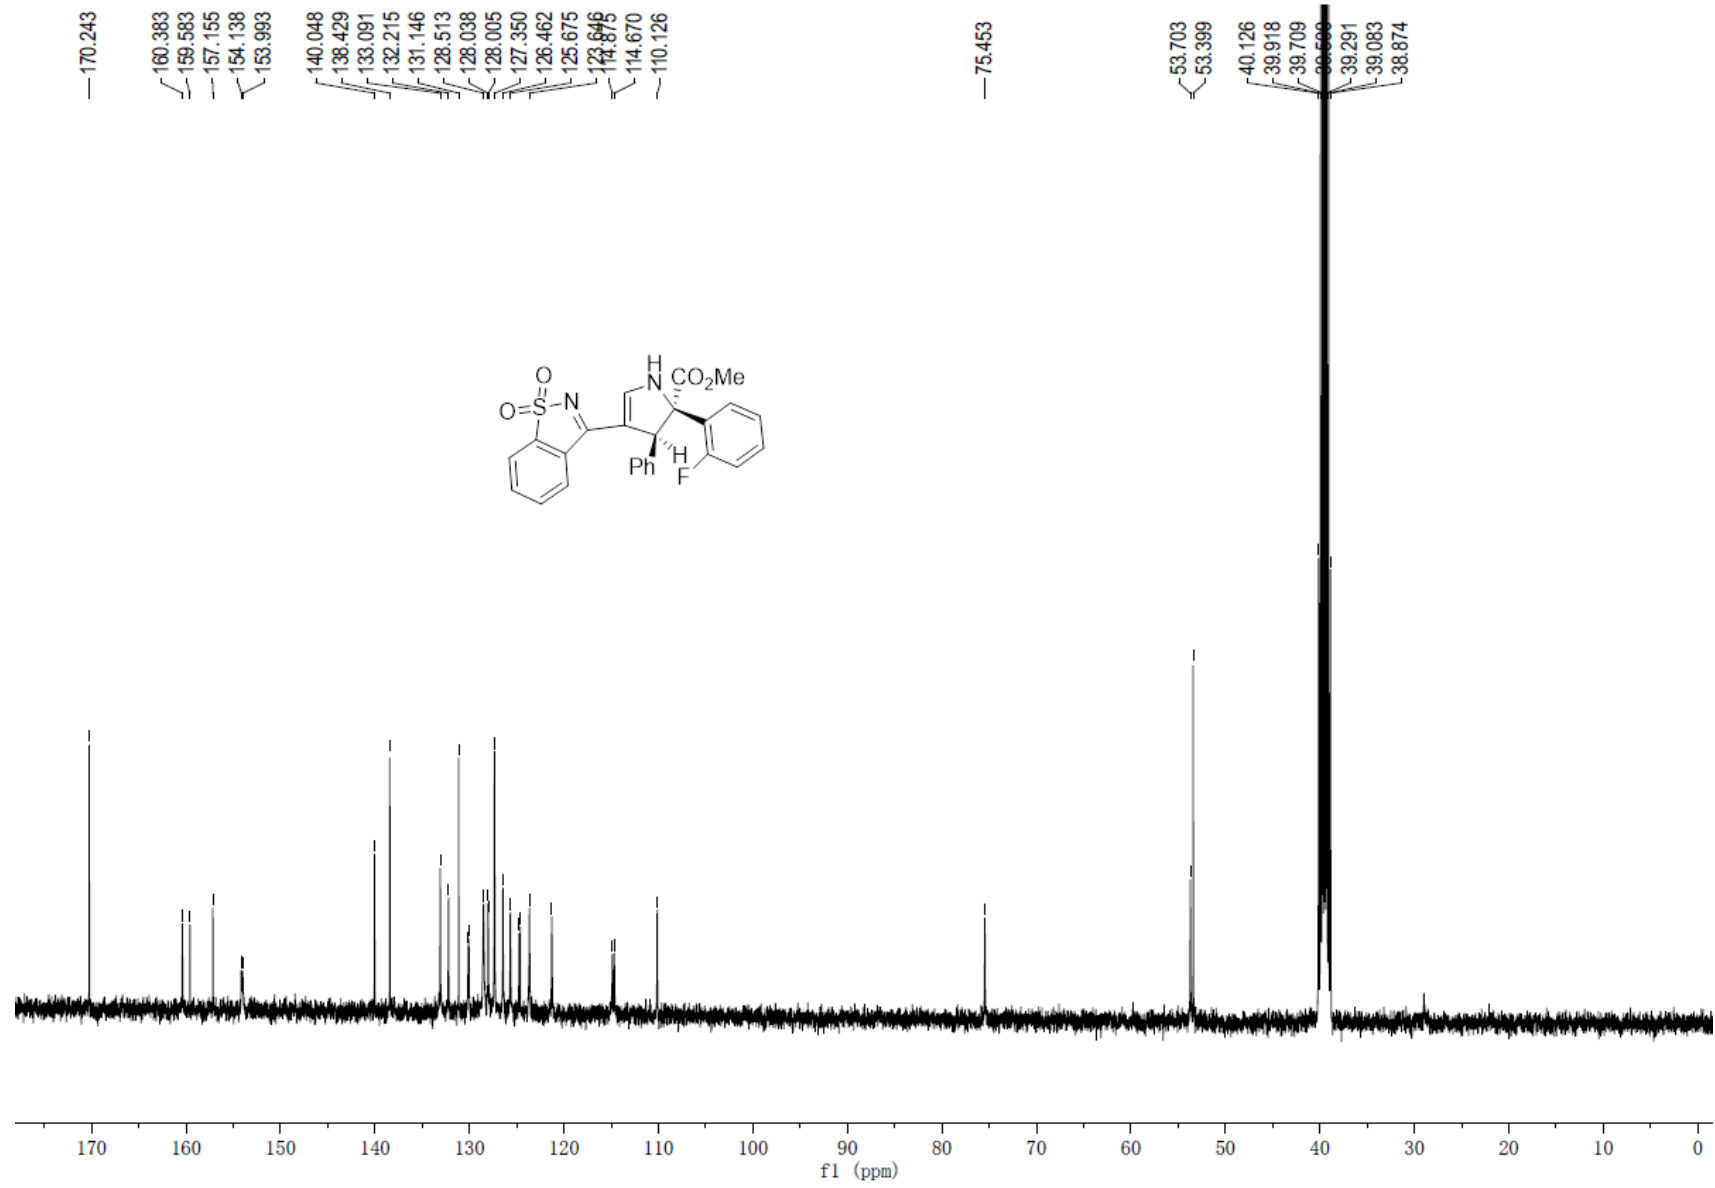



<sup>19</sup>F NMR of **4i**

111.250

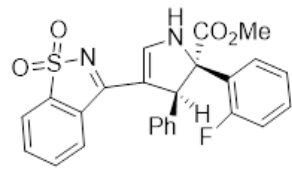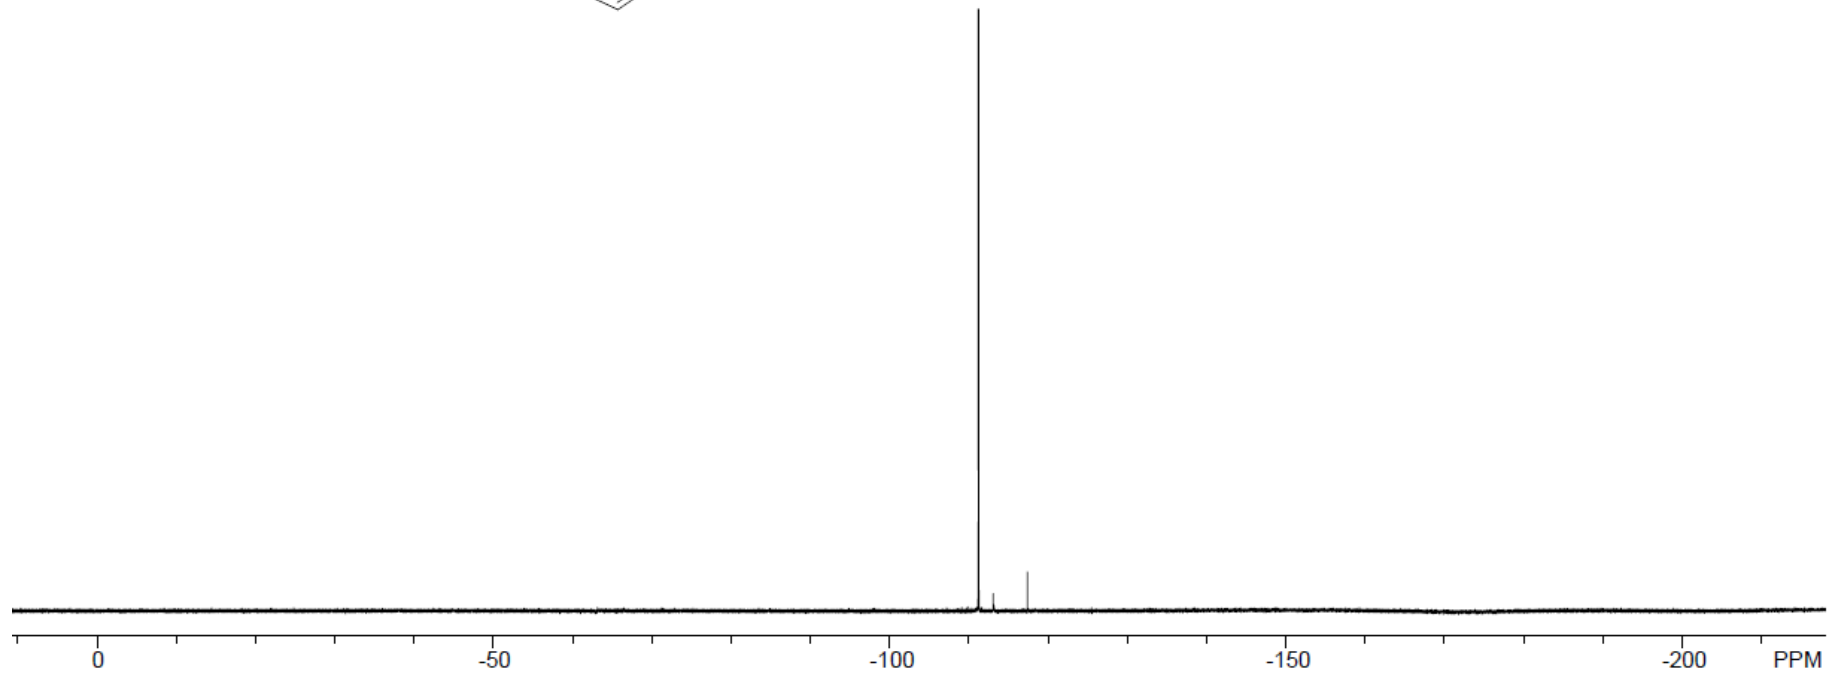

<sup>1</sup>H NMR of **4k**

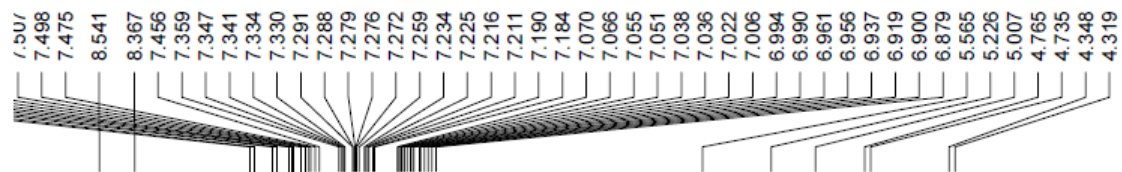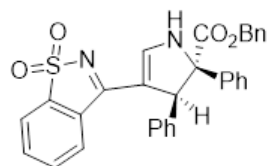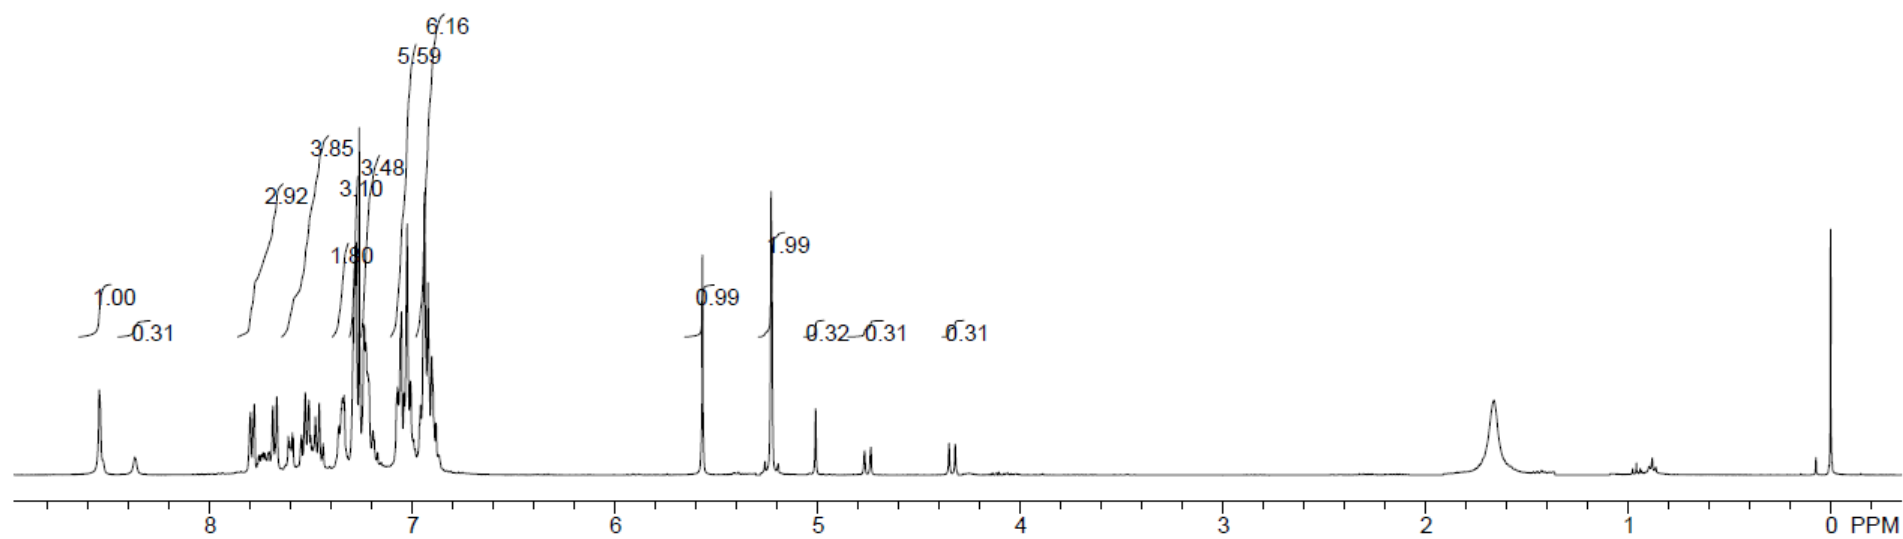

<sup>13</sup>C NMR of **4k**

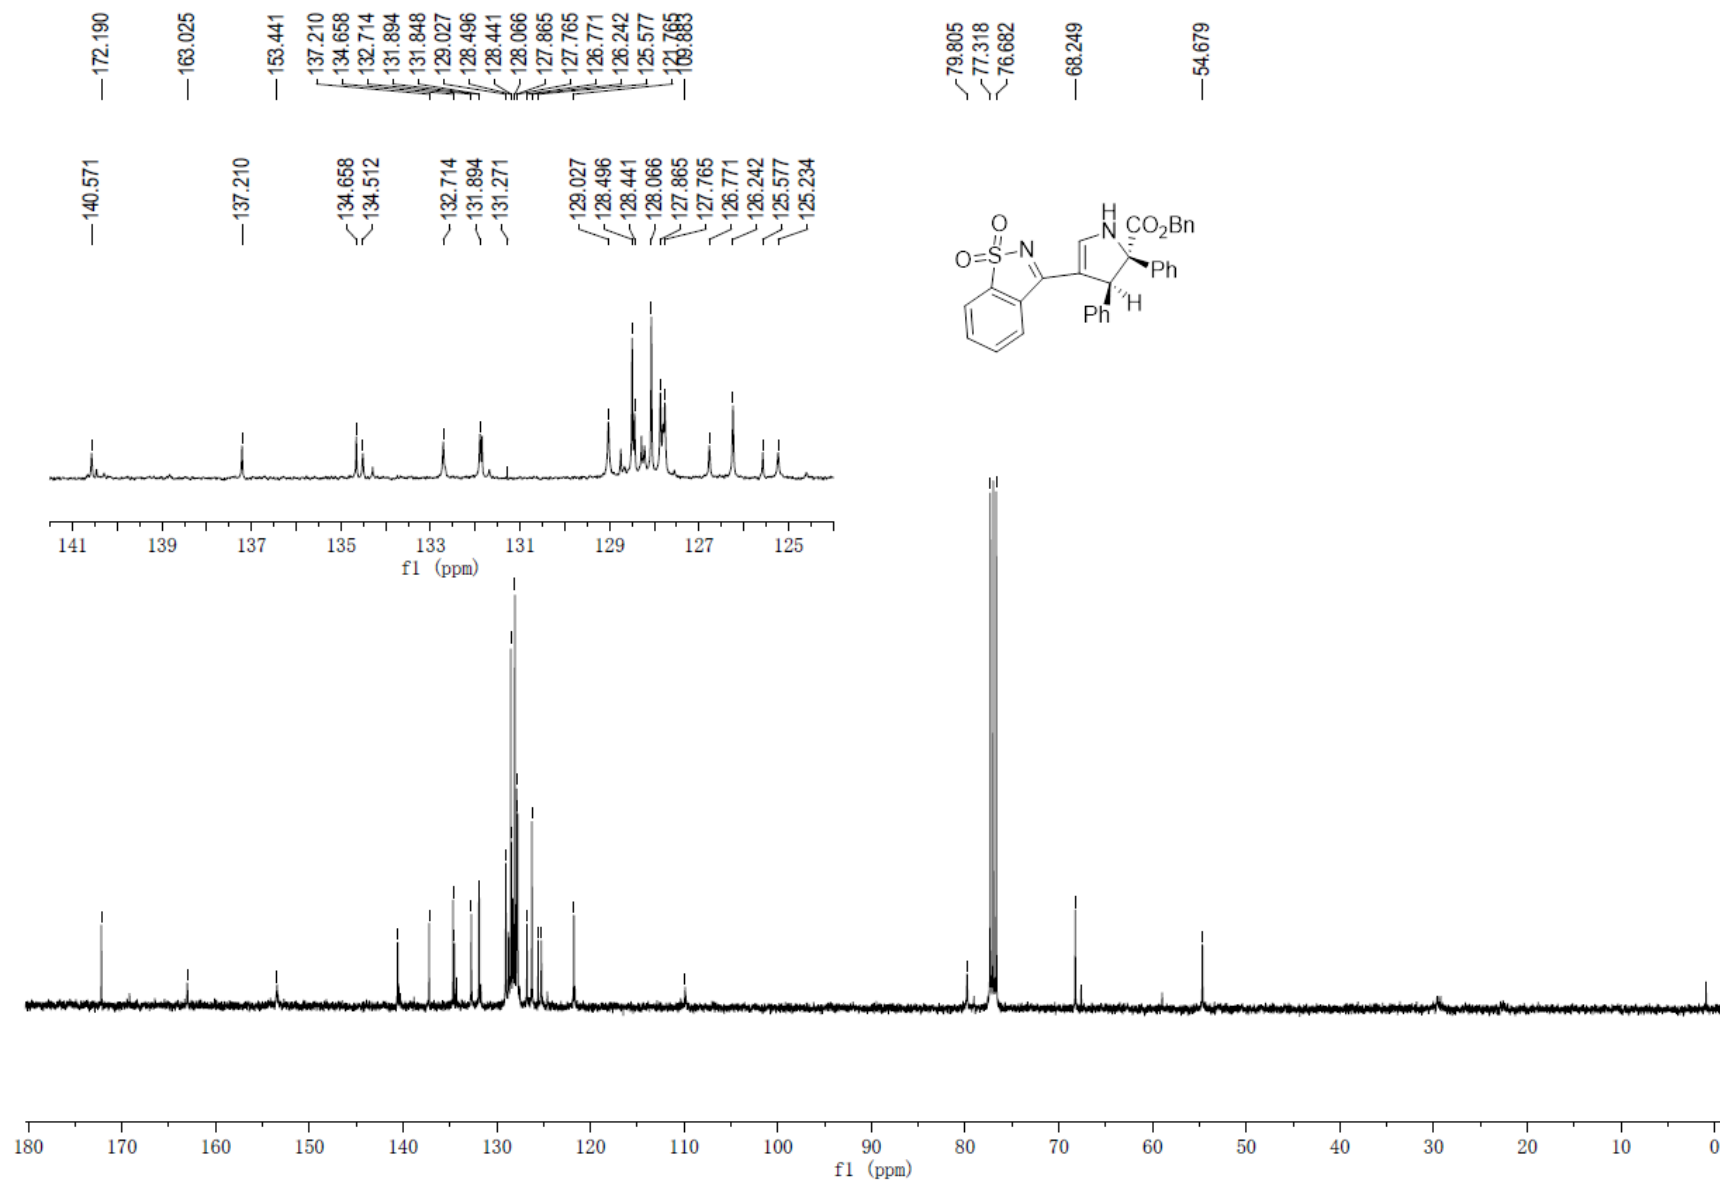

<sup>1</sup>H NMR of **4I**

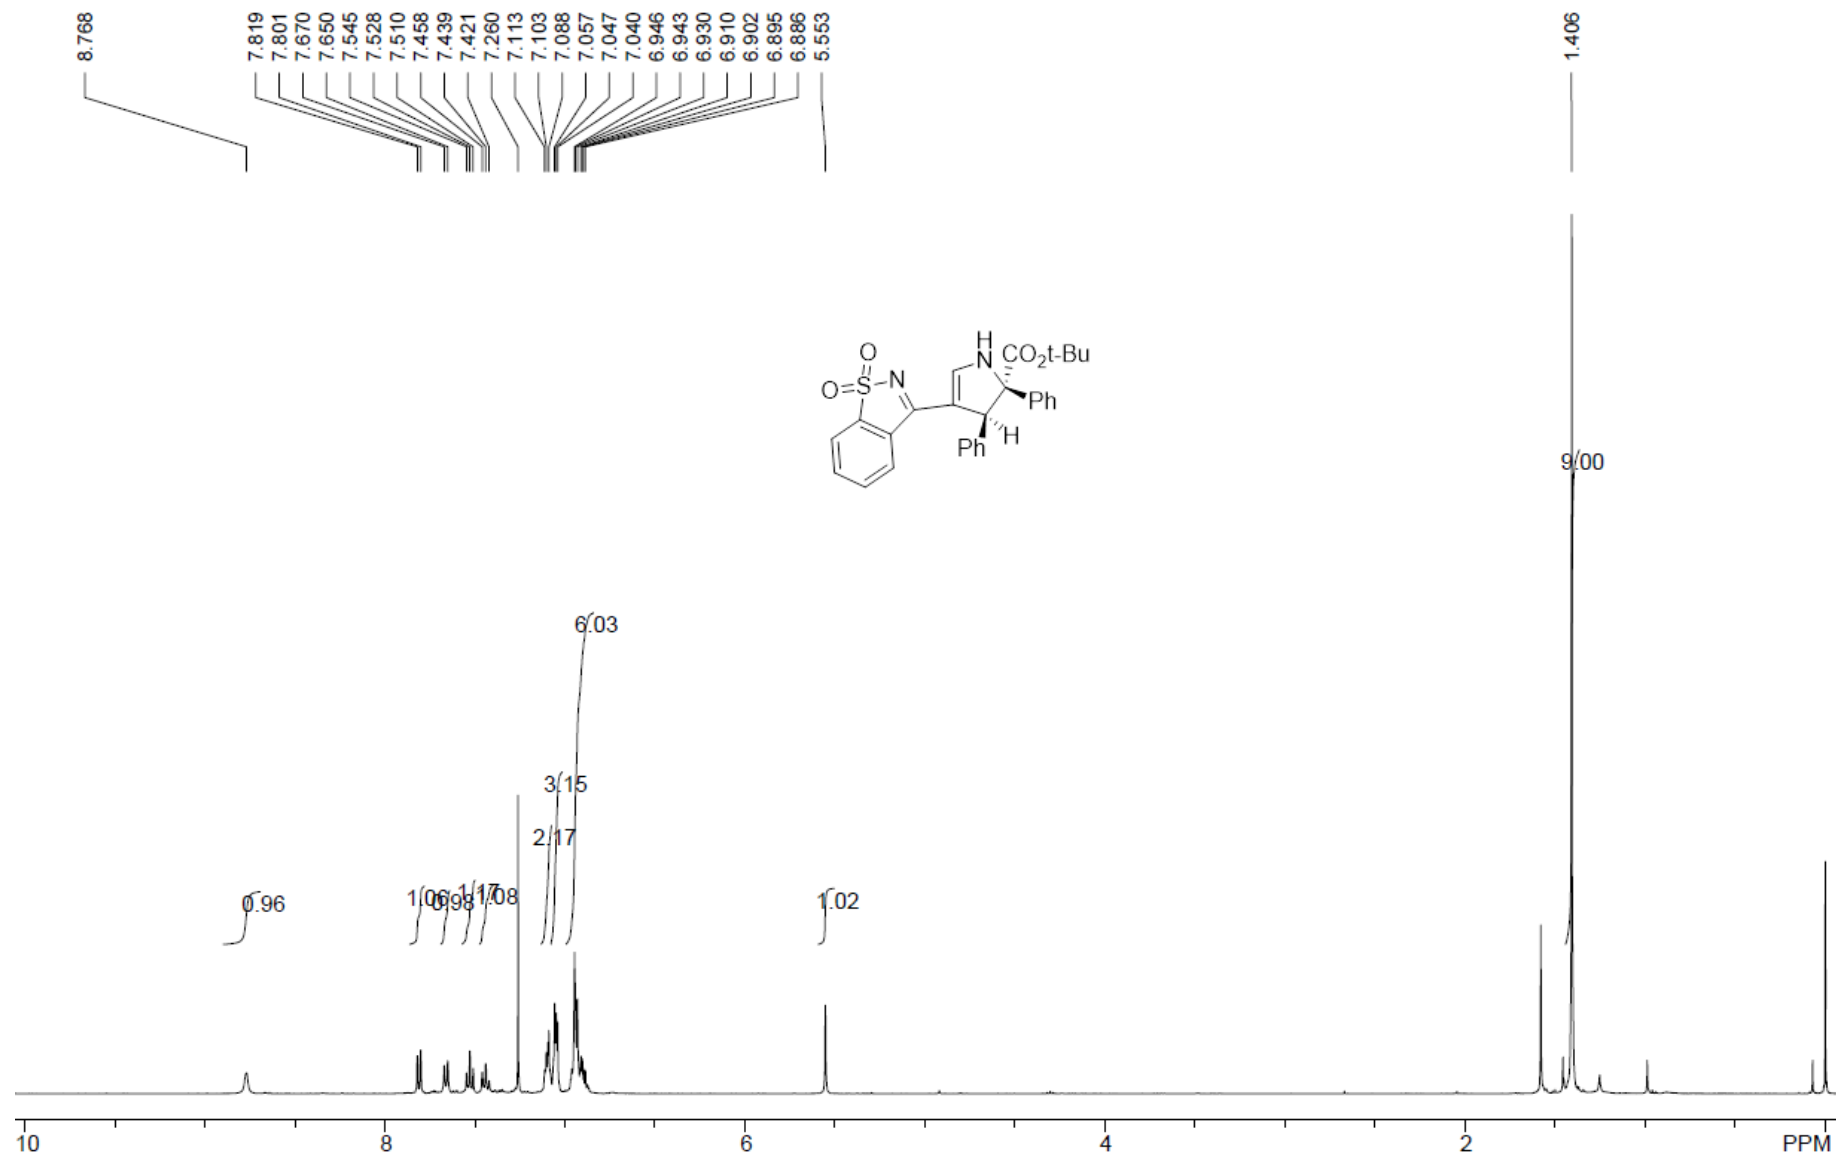

<sup>13</sup>C NMR of **4I**

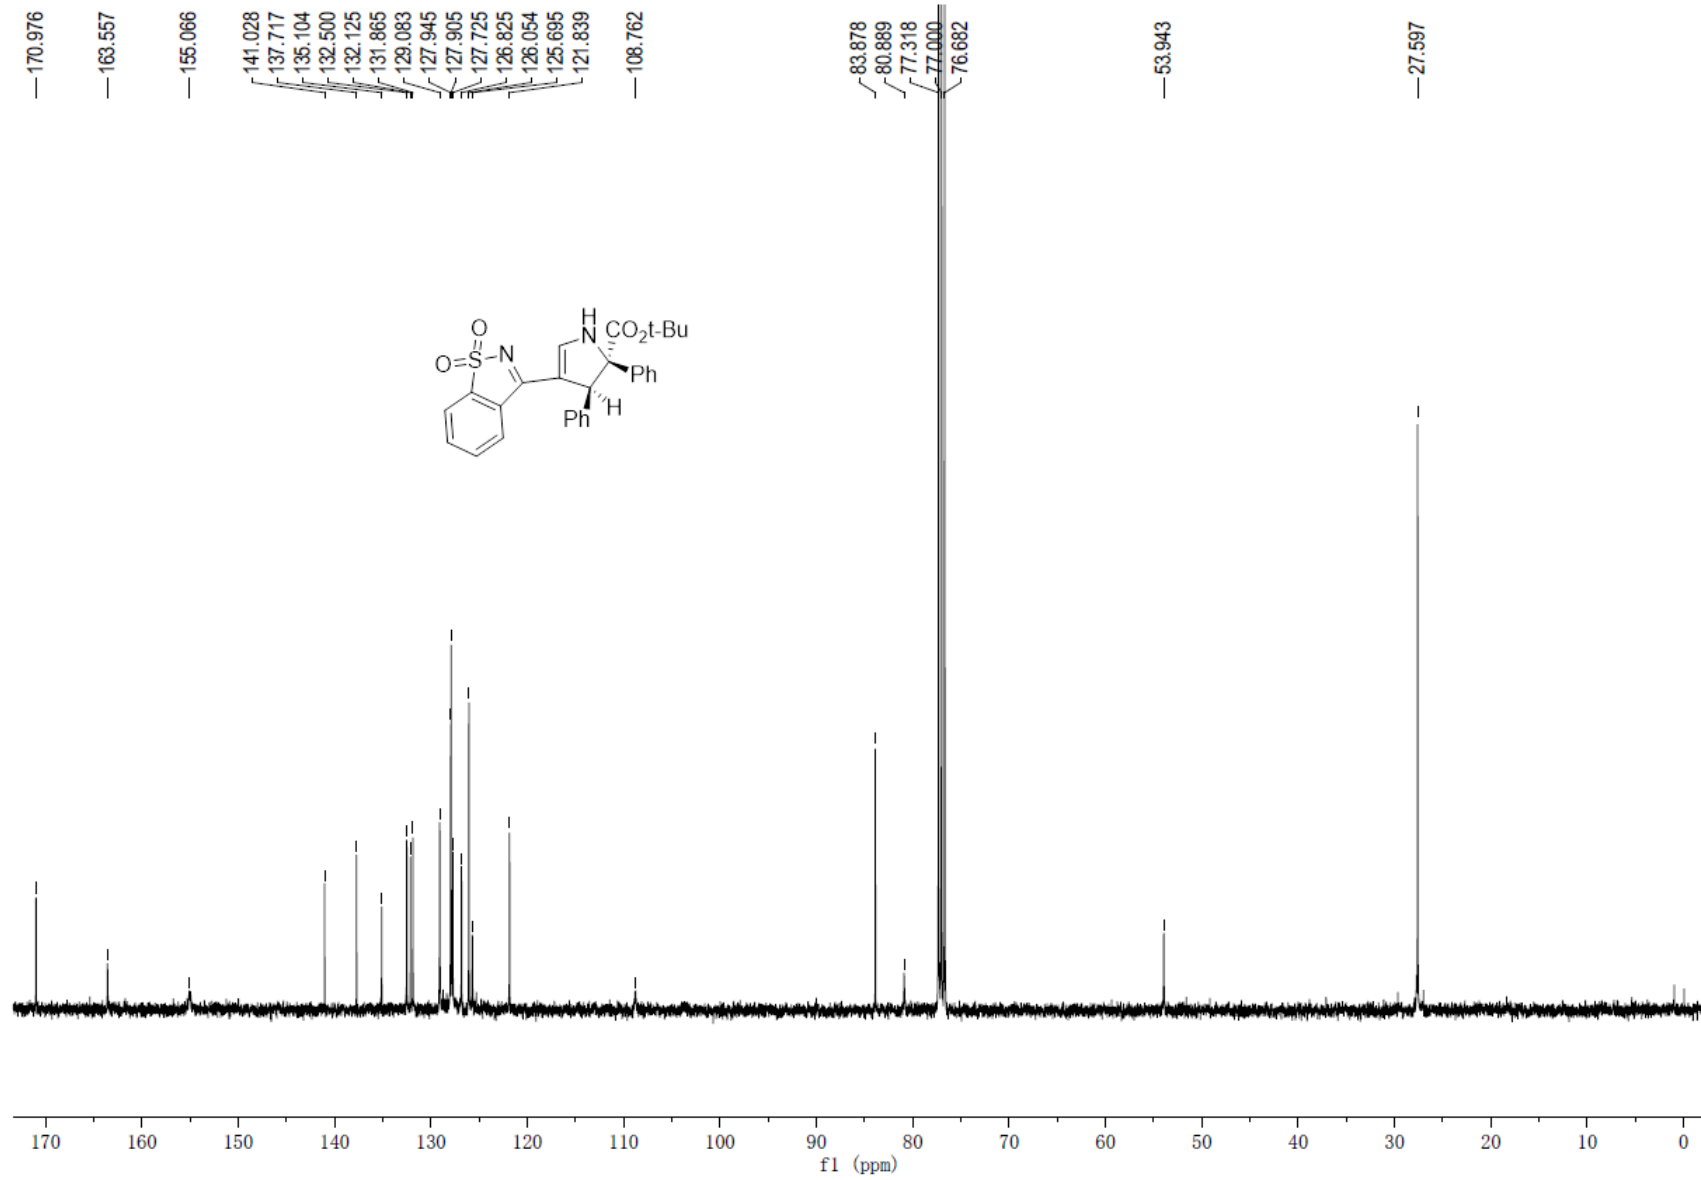

<sup>1</sup>H NMR of 4m

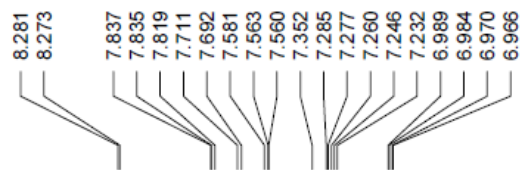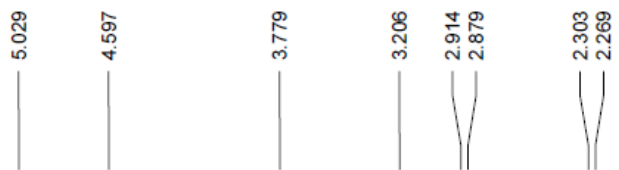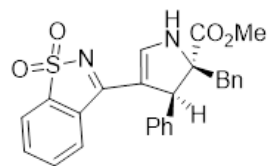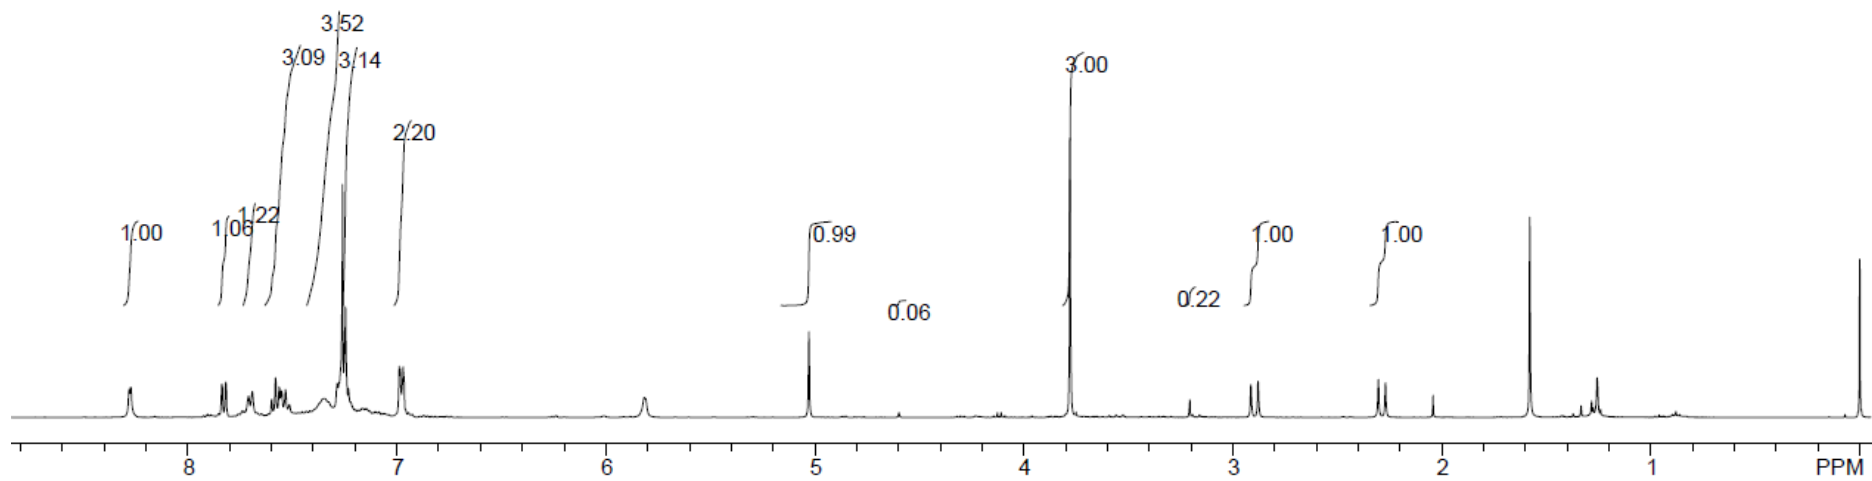

<sup>13</sup>C NMR of **4m**

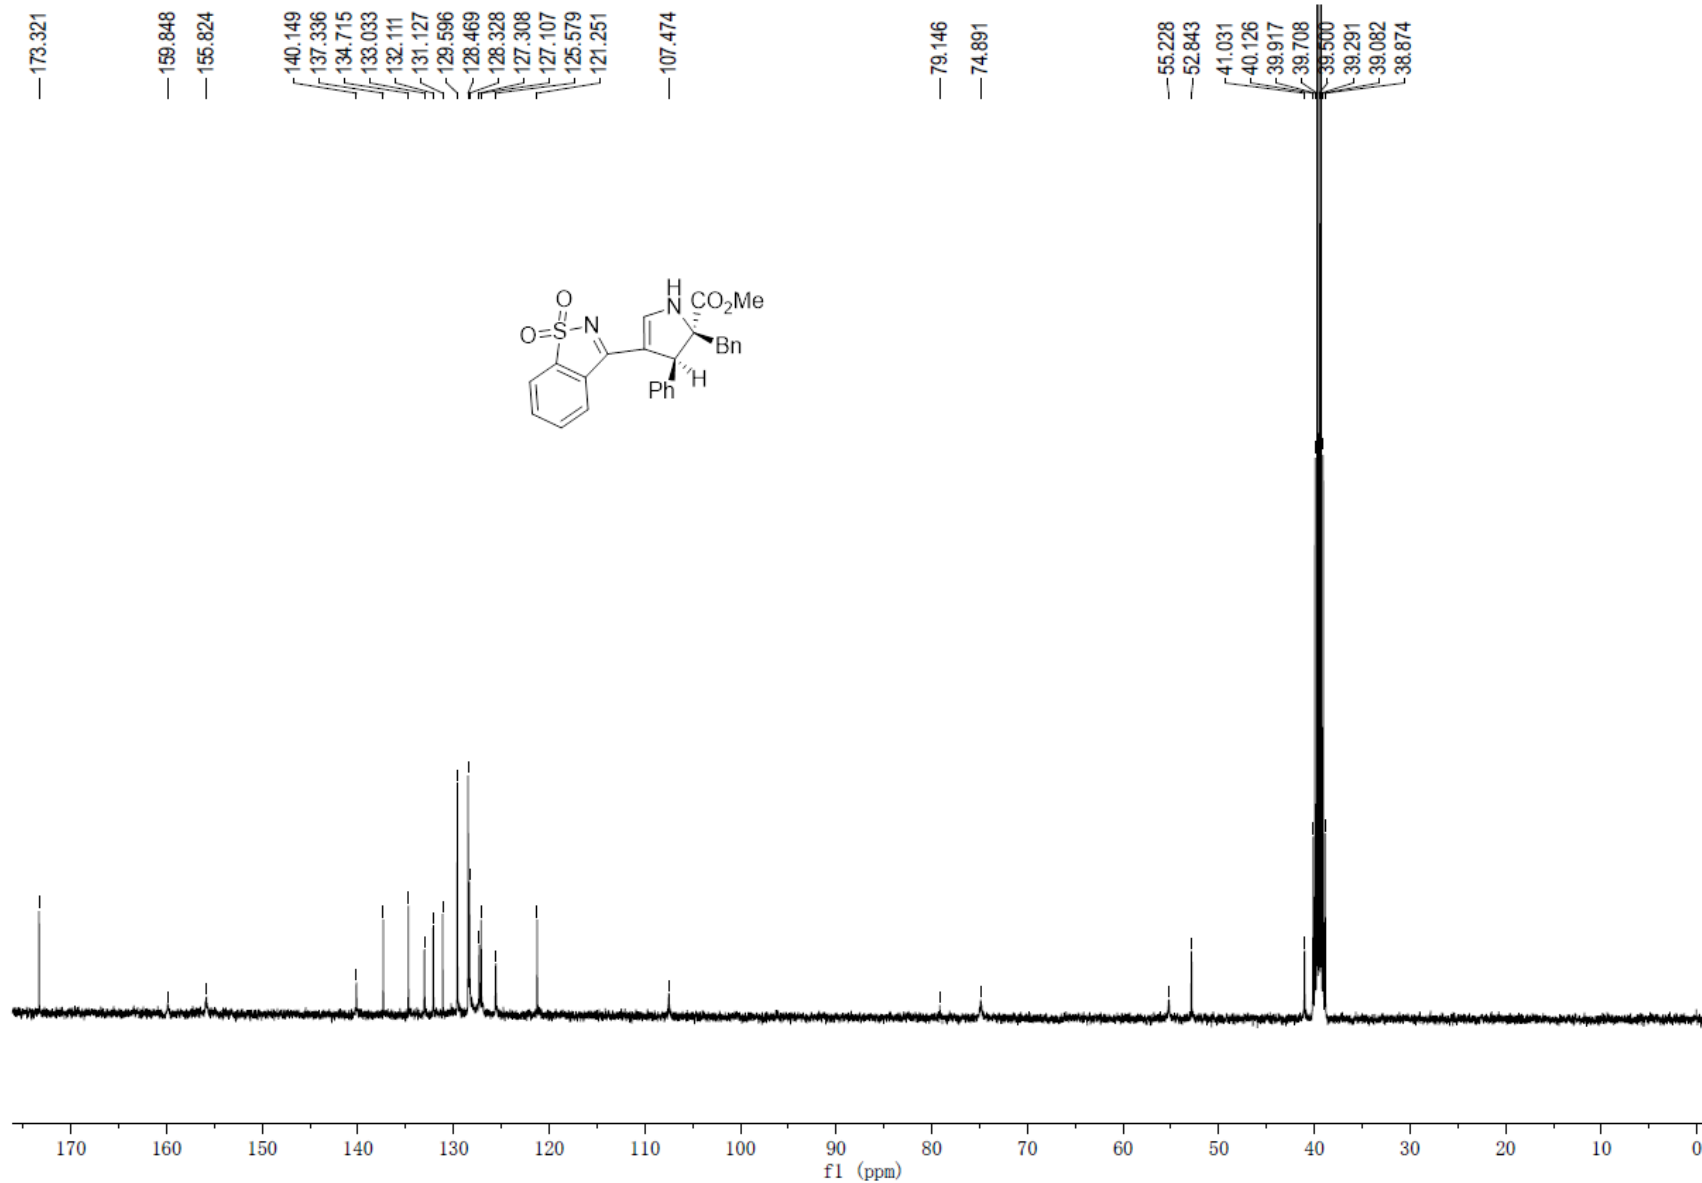

<sup>1</sup>H NMR of **4n**

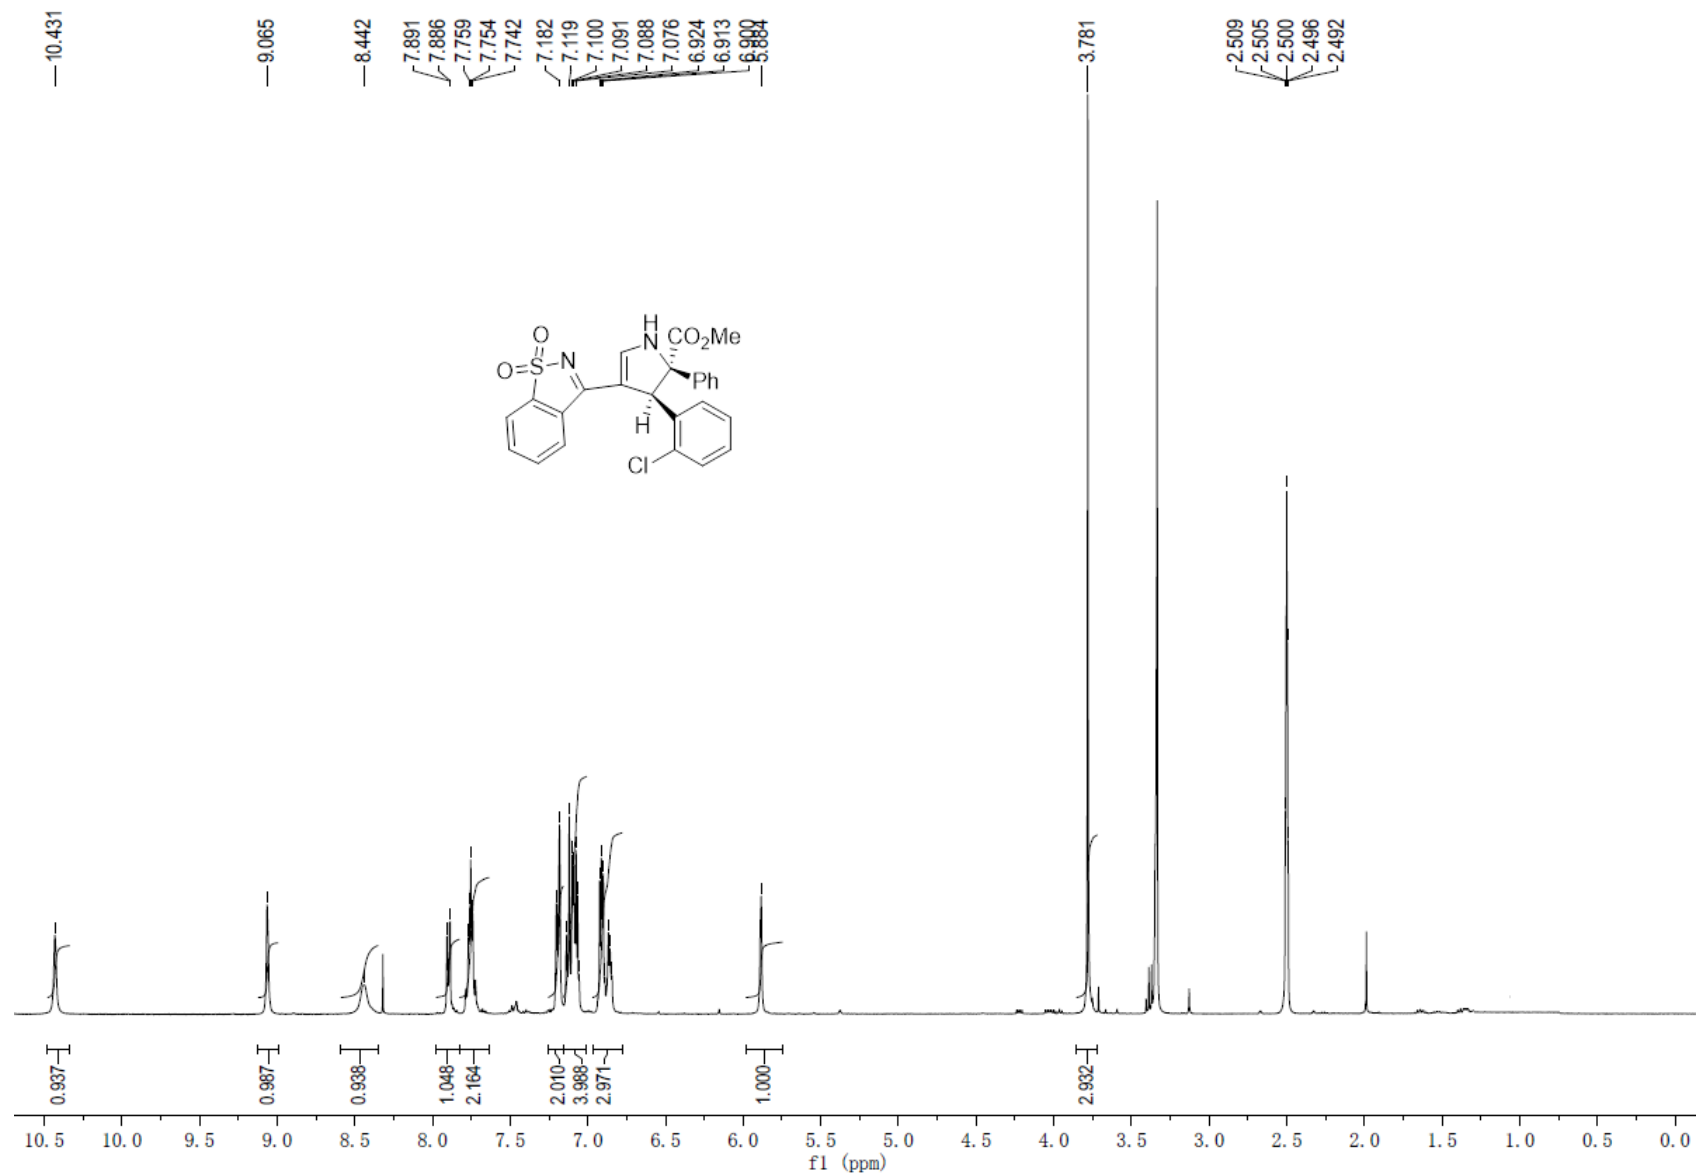



<sup>13</sup>C NMR of **4n**

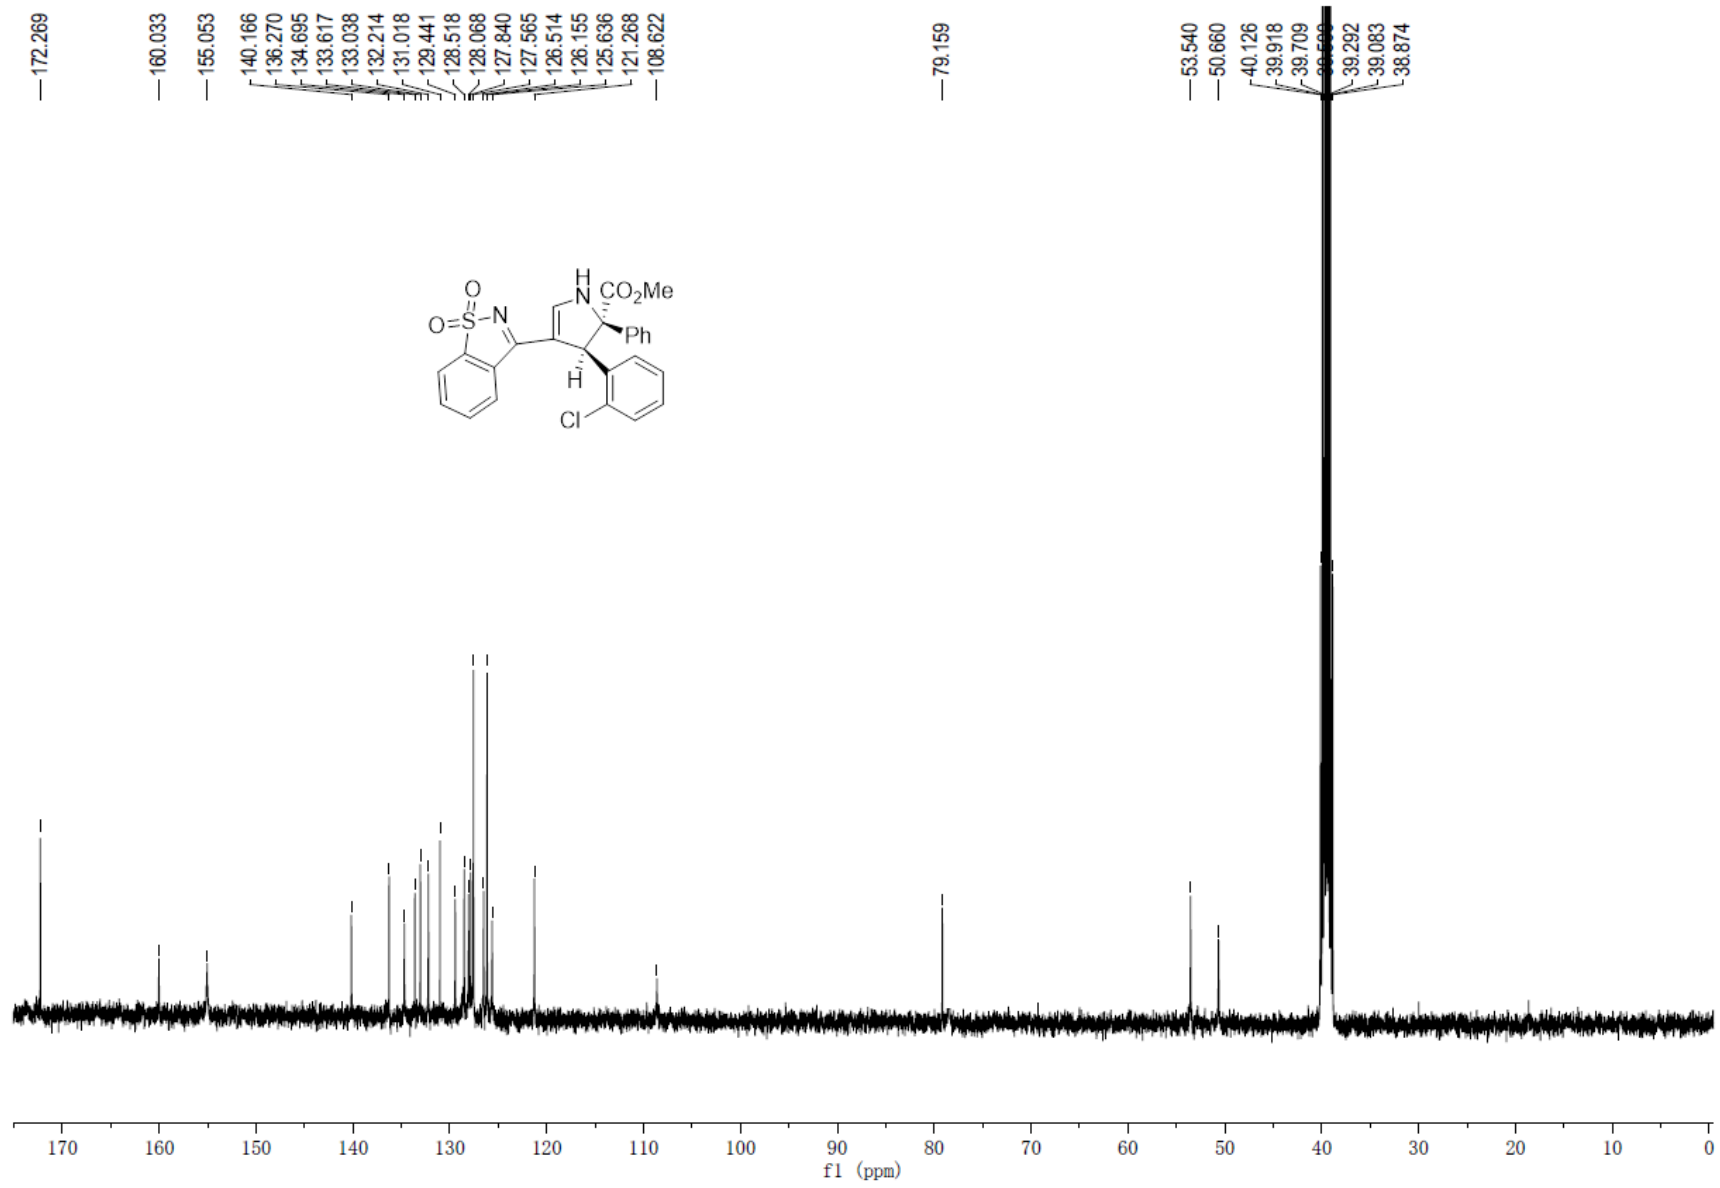

<sup>1</sup>H NMR of **4o**

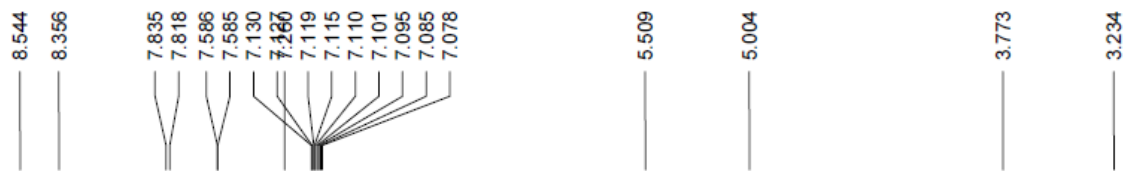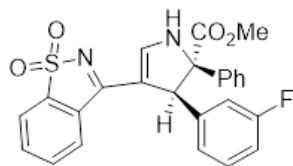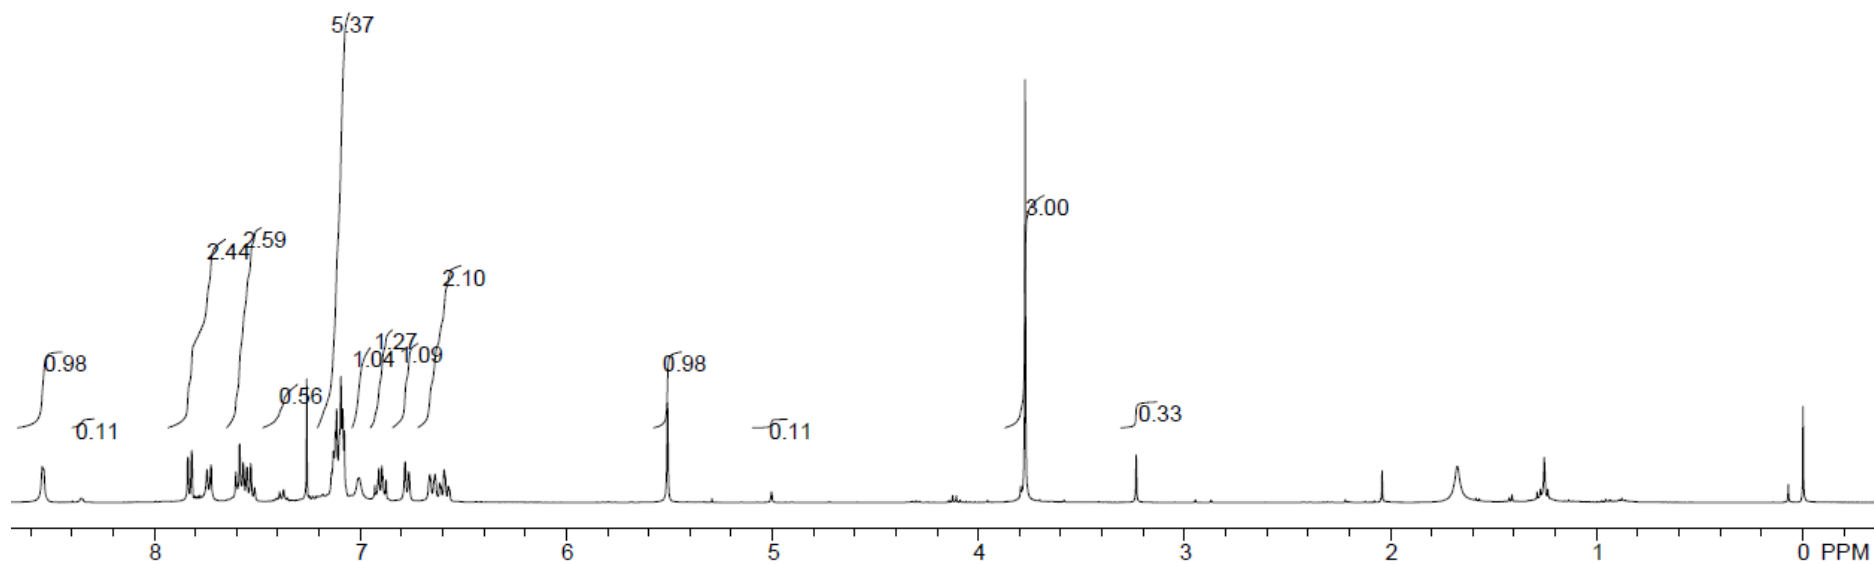

<sup>13</sup>C NMR of **40**

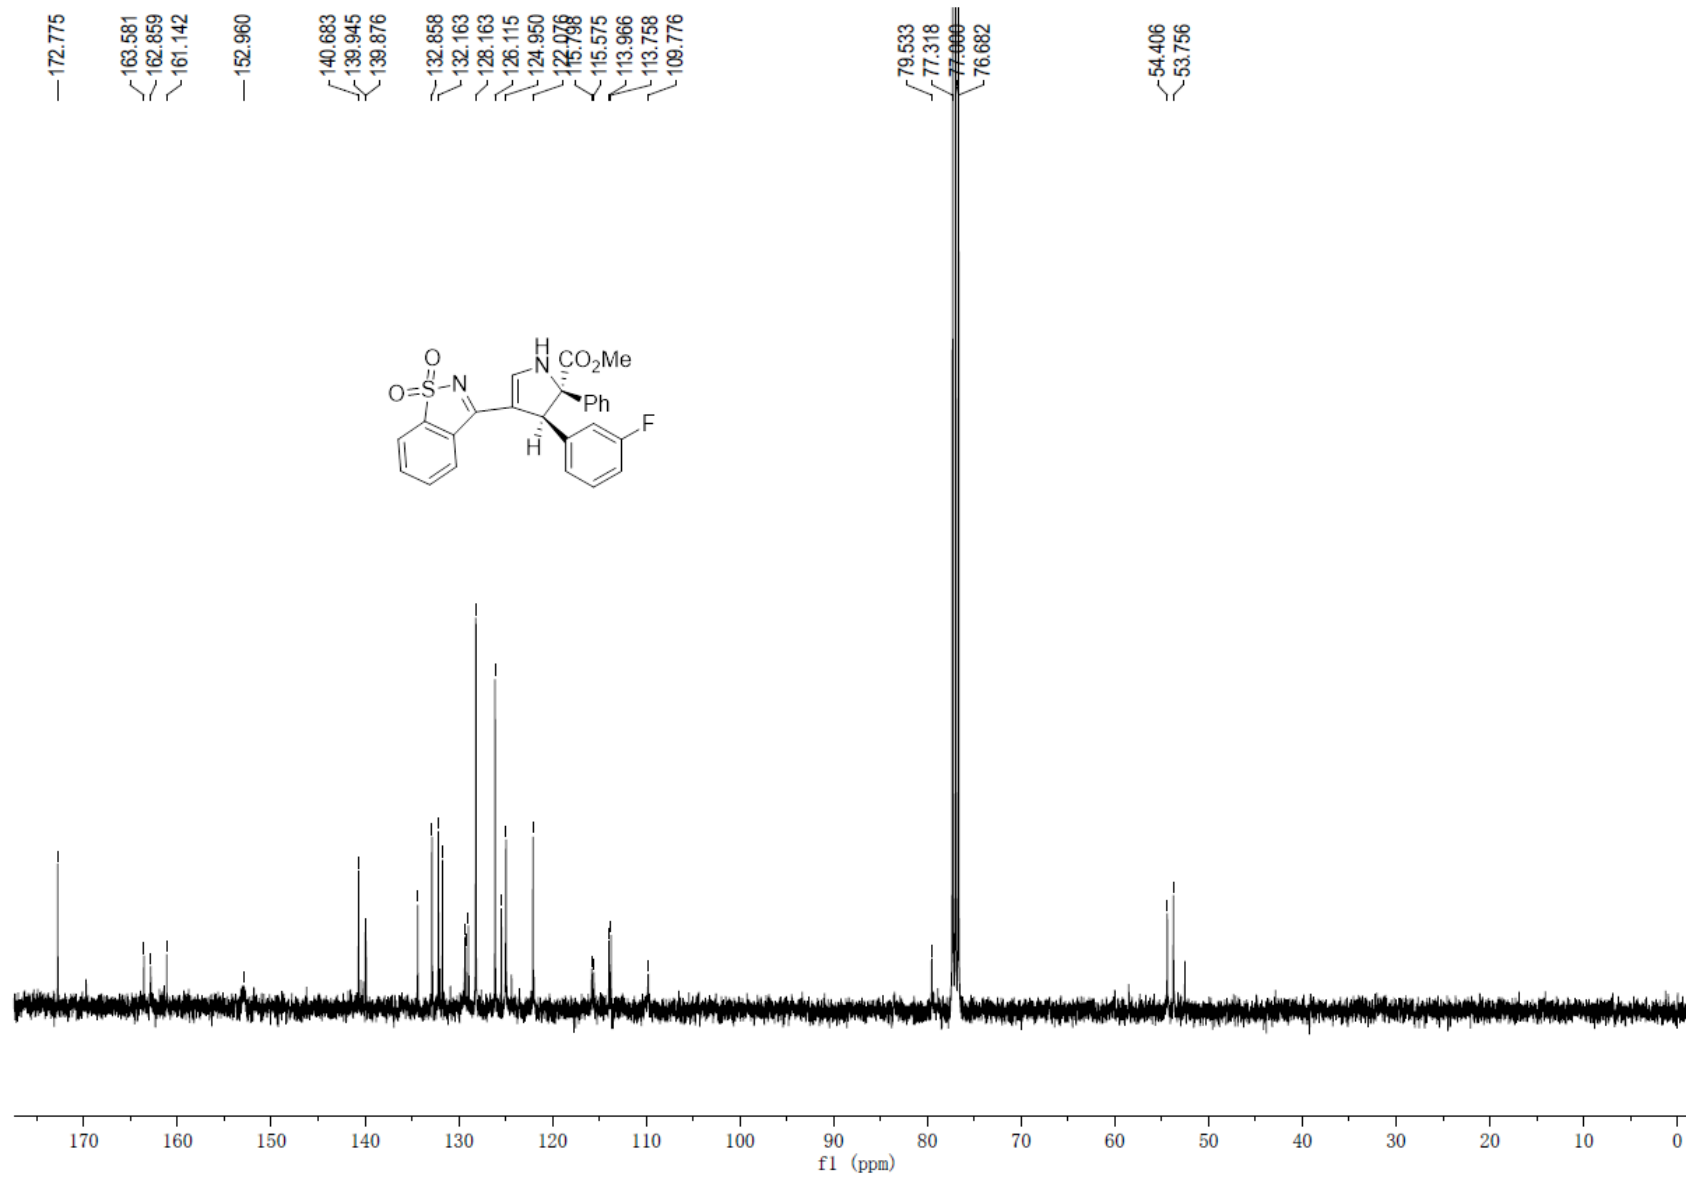

<sup>19</sup>F NMR of **4o**

113.153  
113.756

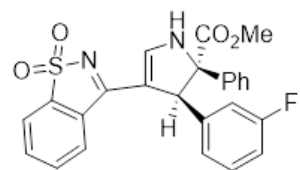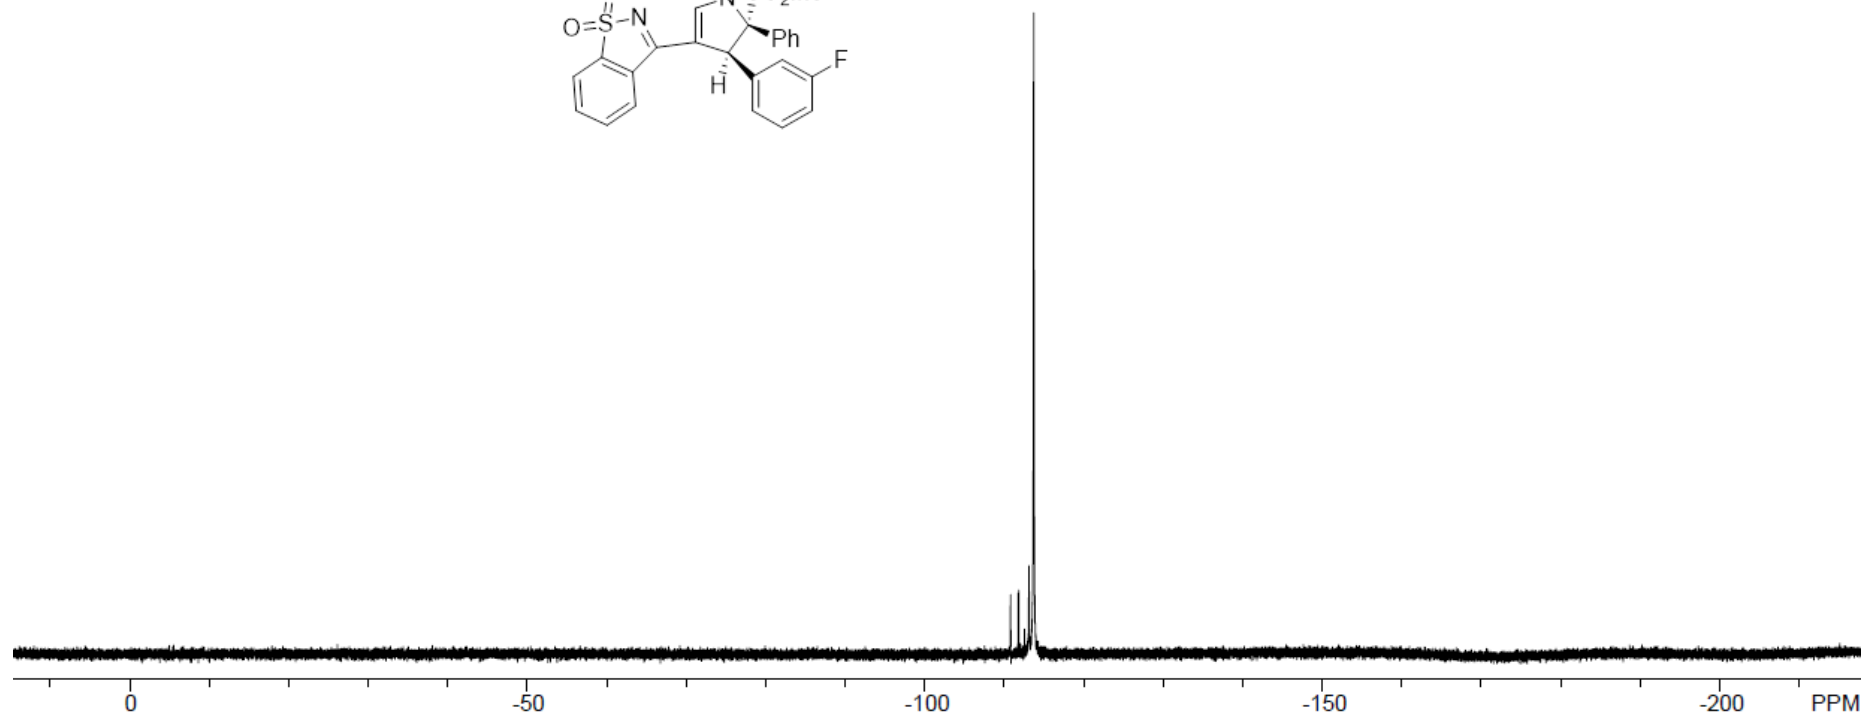

<sup>1</sup>H NMR of 4p

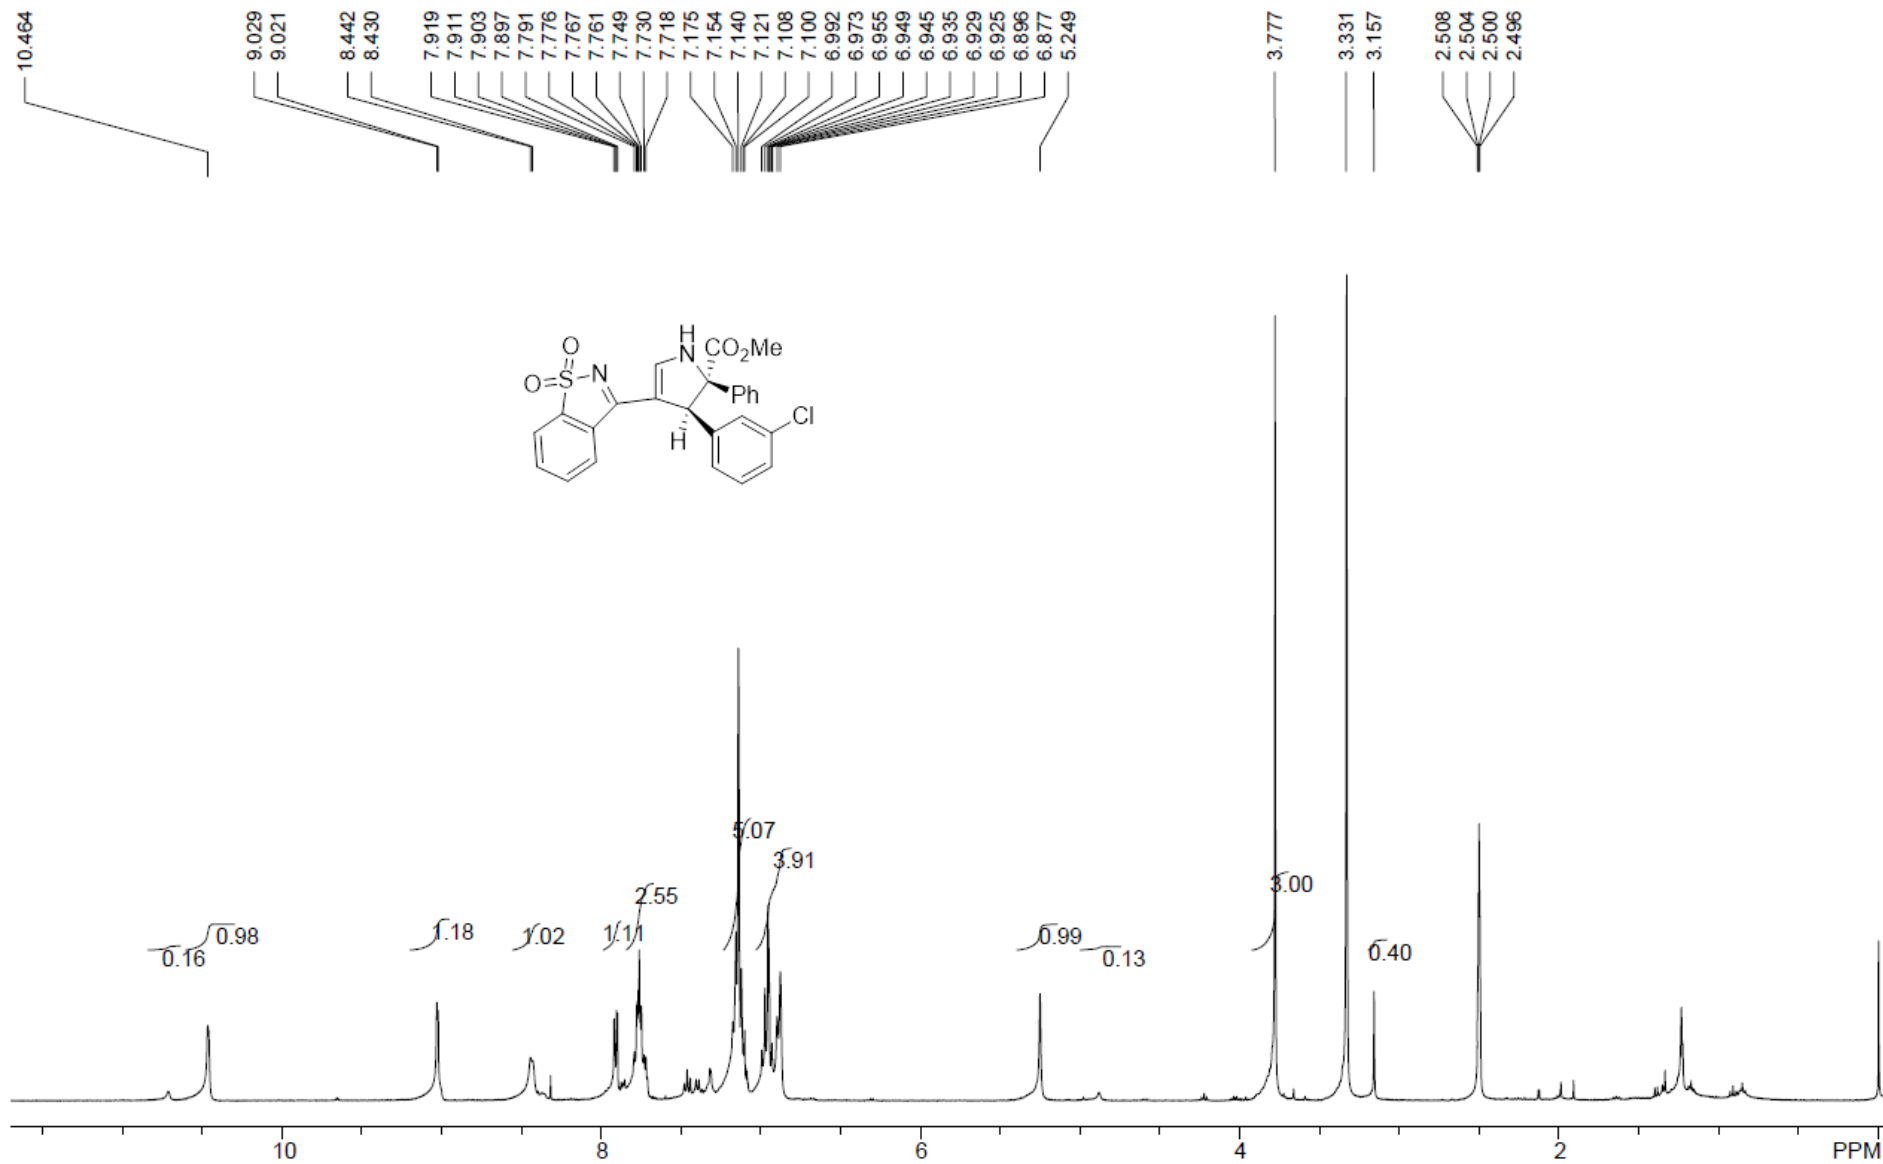

<sup>13</sup>C NMR of **4p**

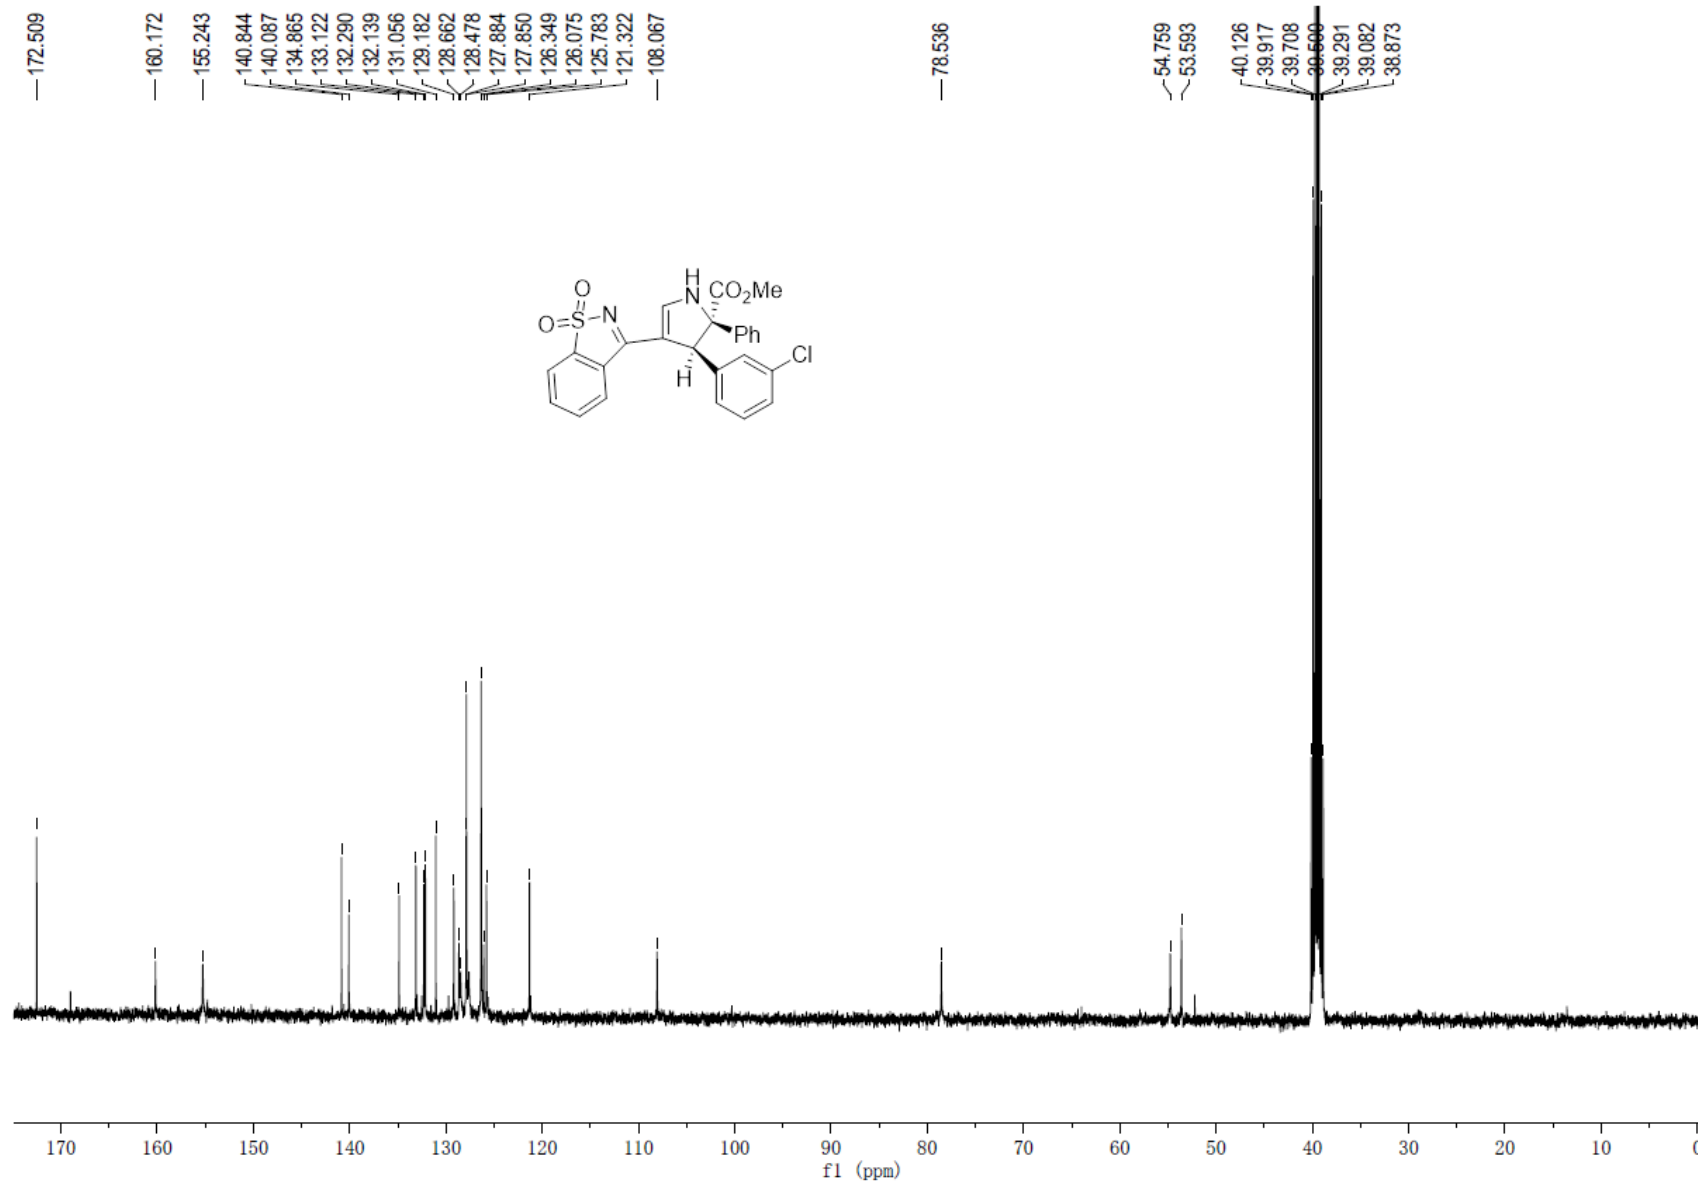

<sup>1</sup>H NMR of **4q**

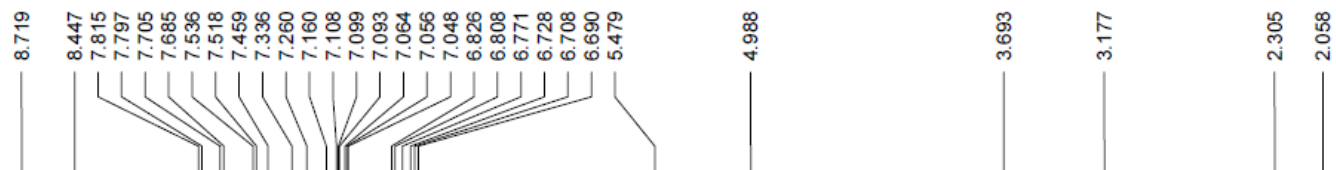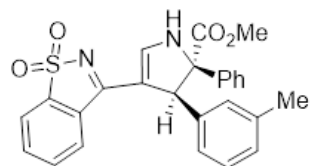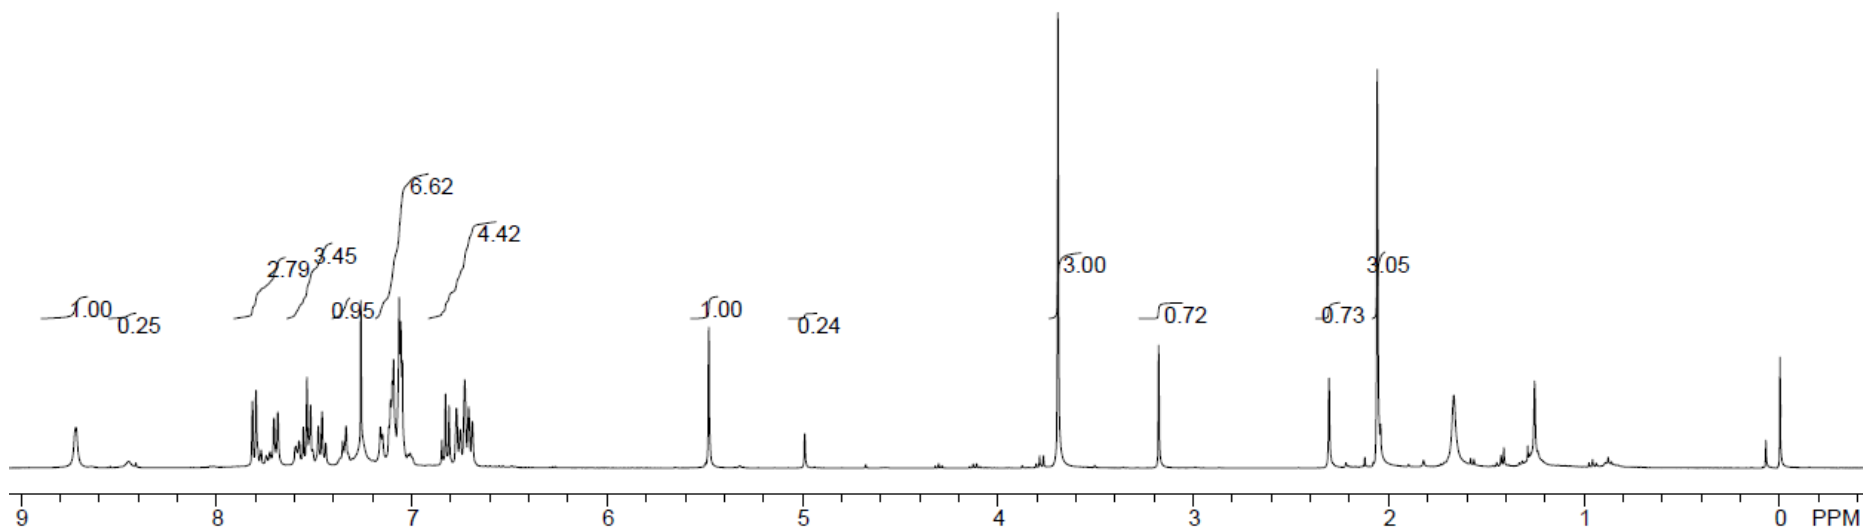

<sup>13</sup>C NMR of **4q**

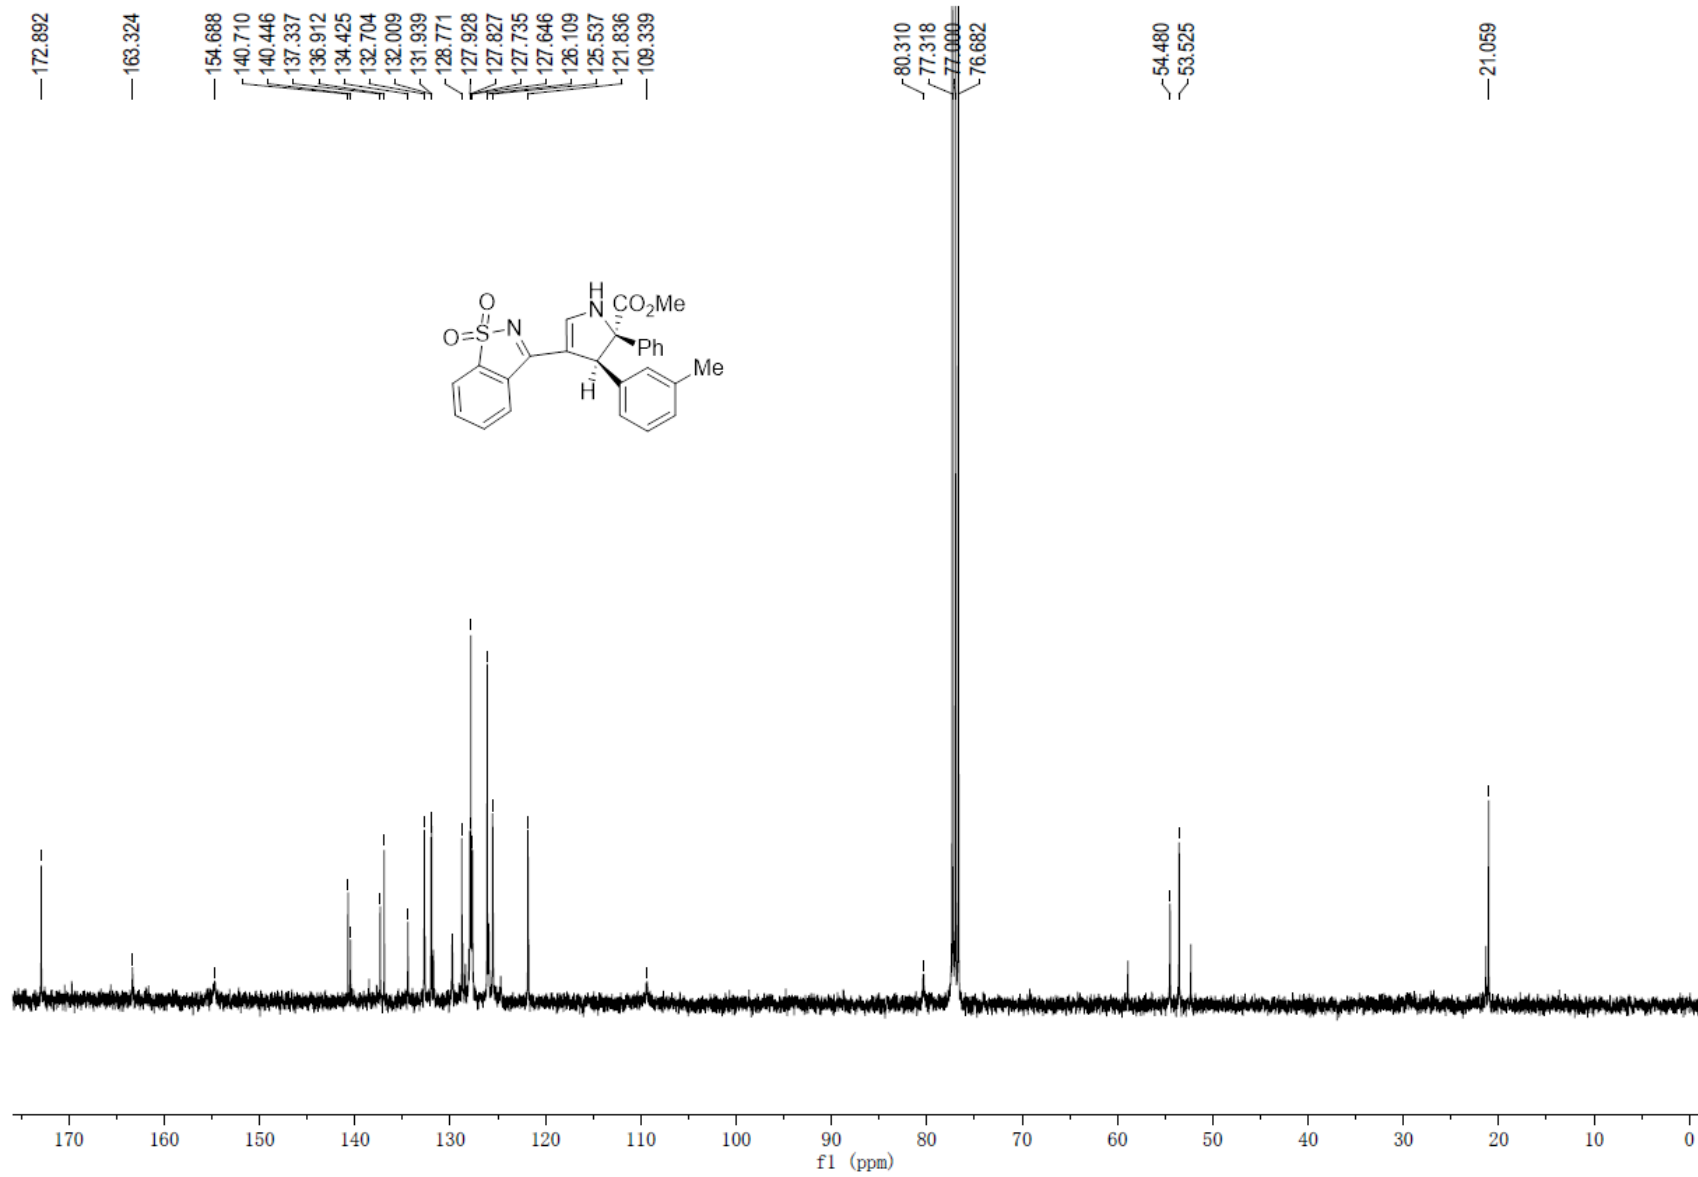



<sup>1</sup>H NMR of 4r

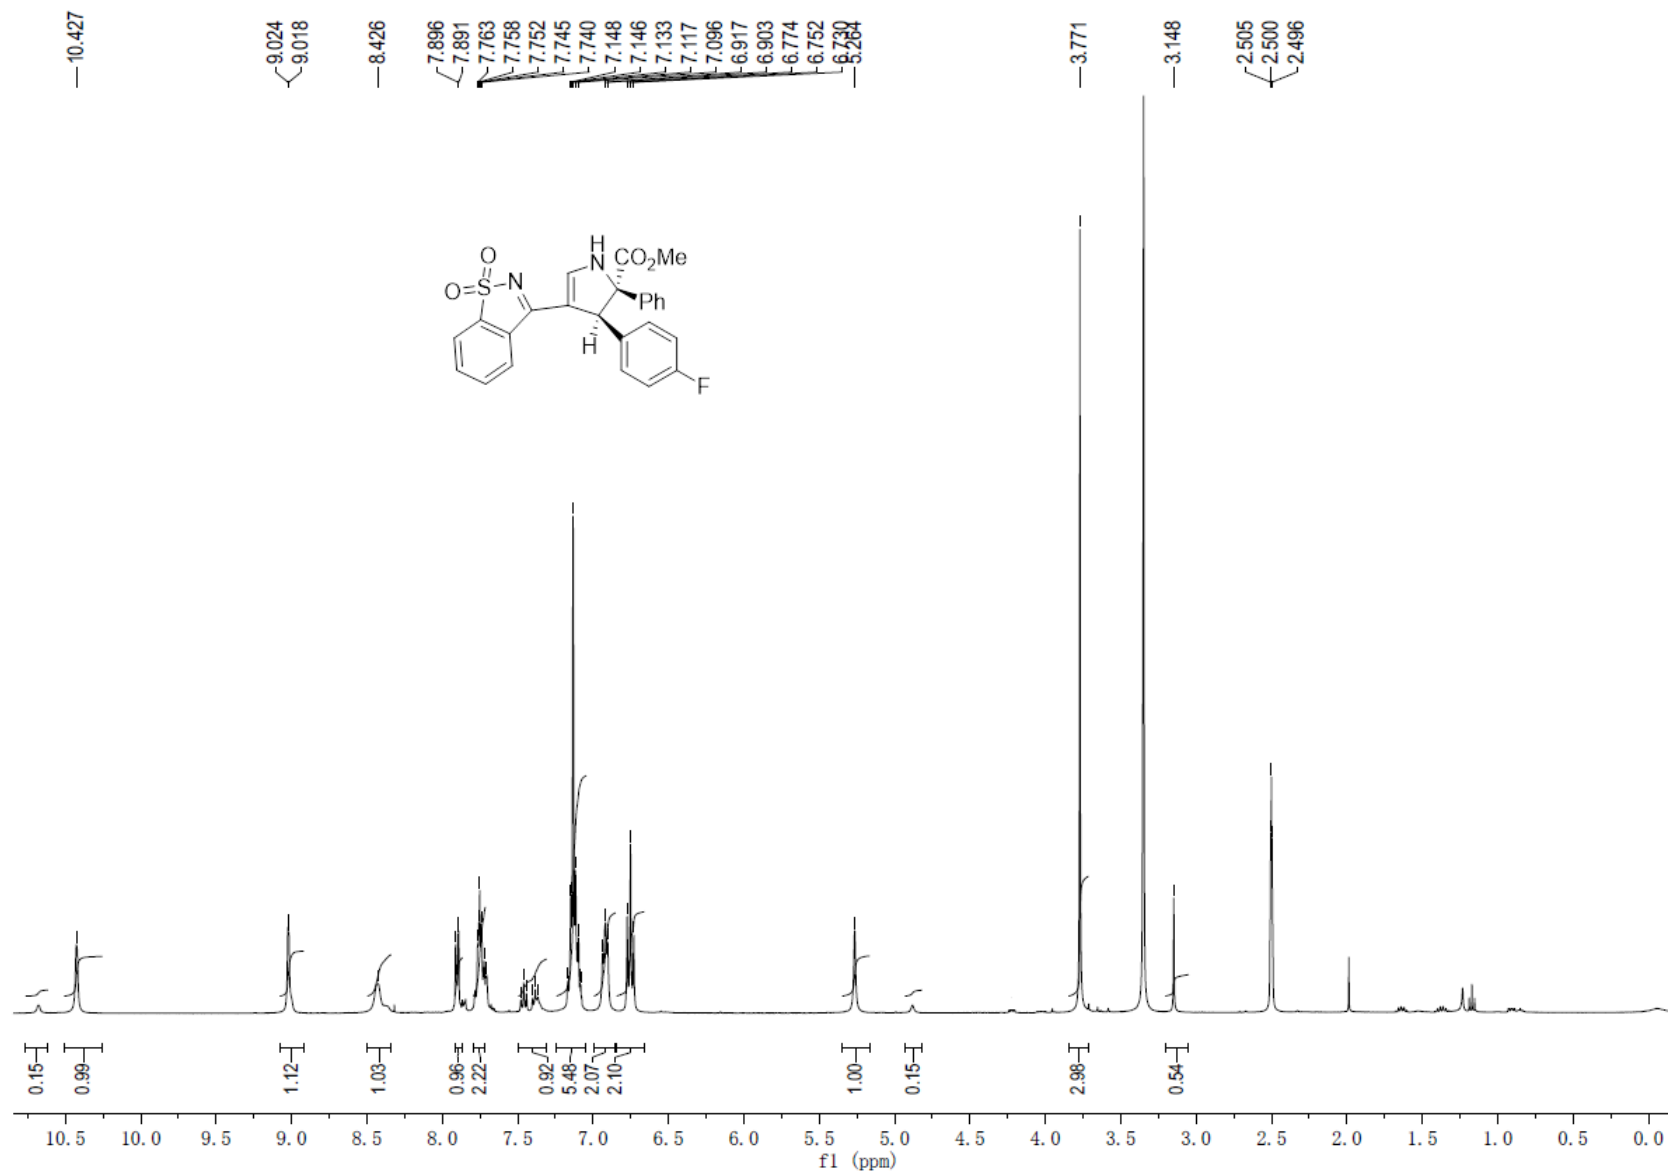

<sup>13</sup>C NMR of **4r**

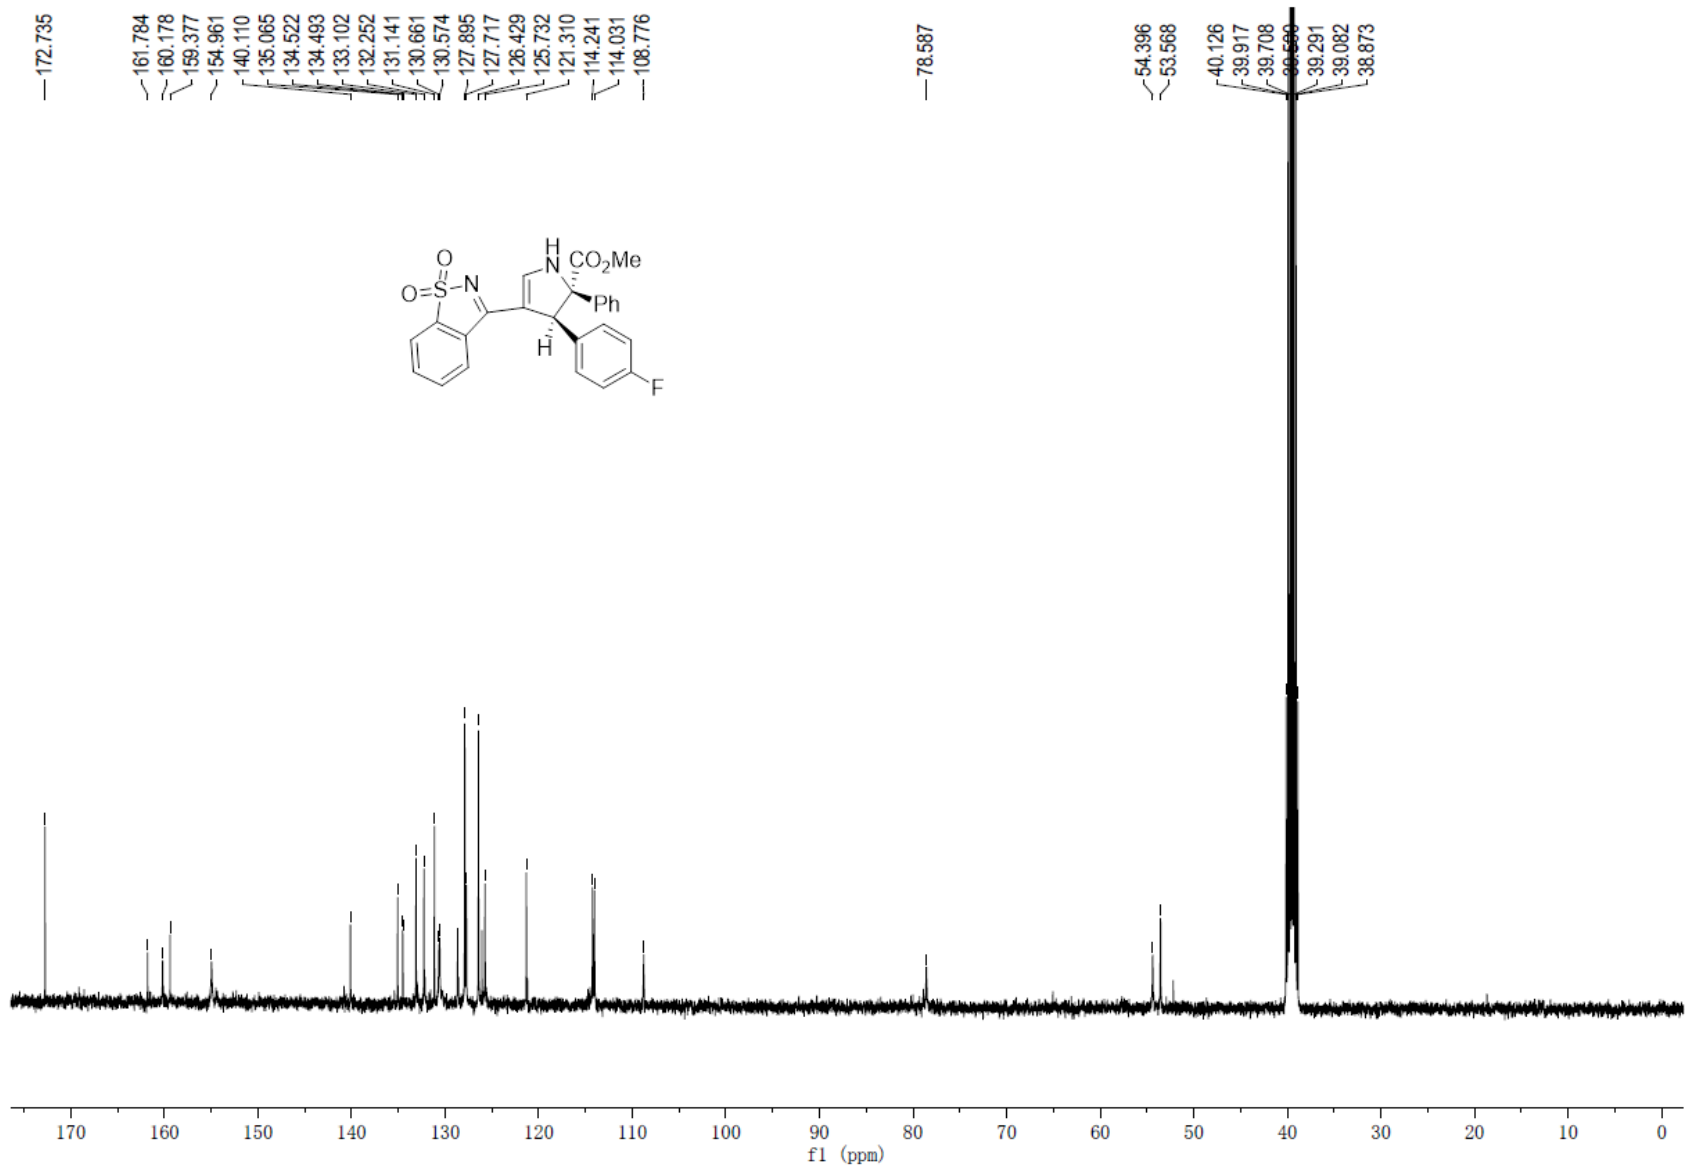

<sup>19</sup>F NMR of **4r**

115.425  
116.461

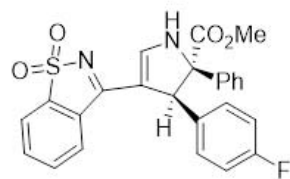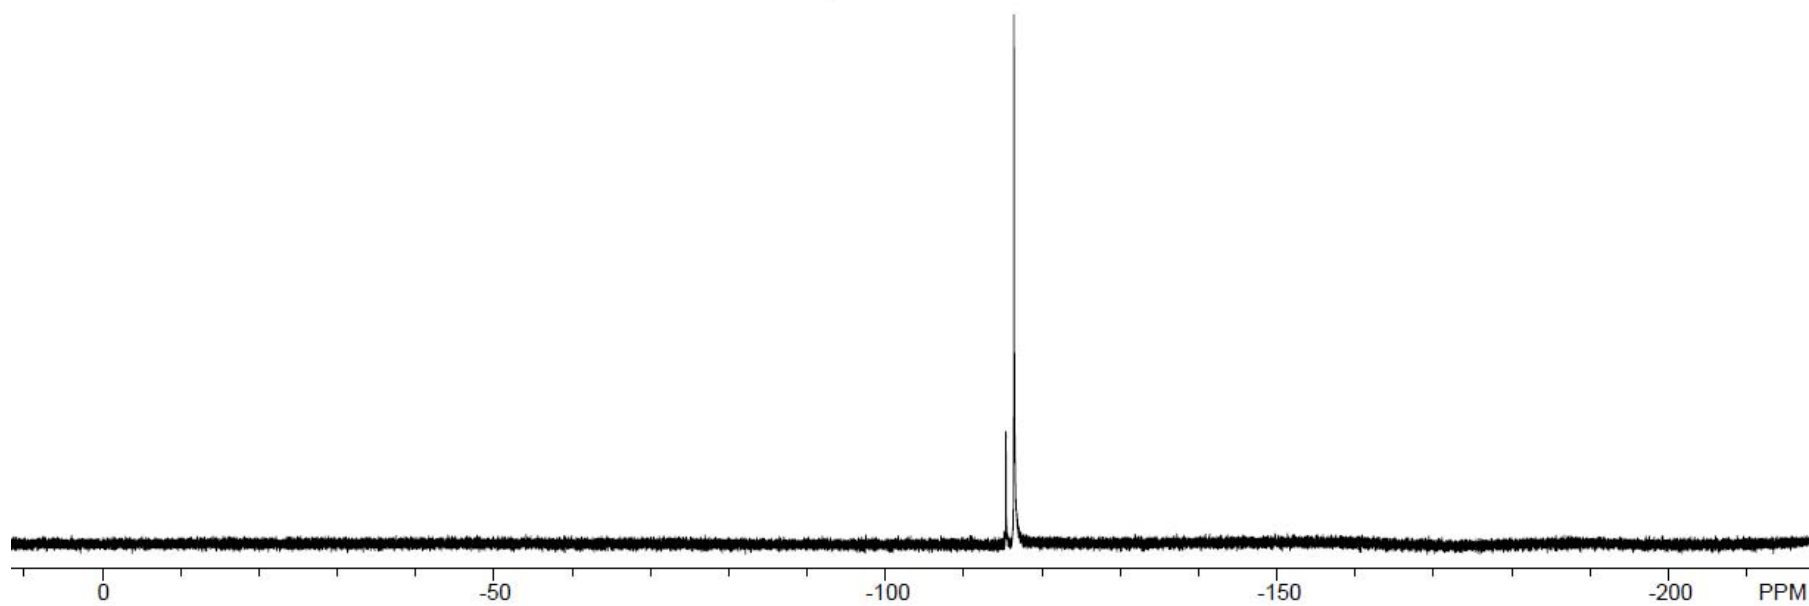

<sup>1</sup>H NMR of 4s

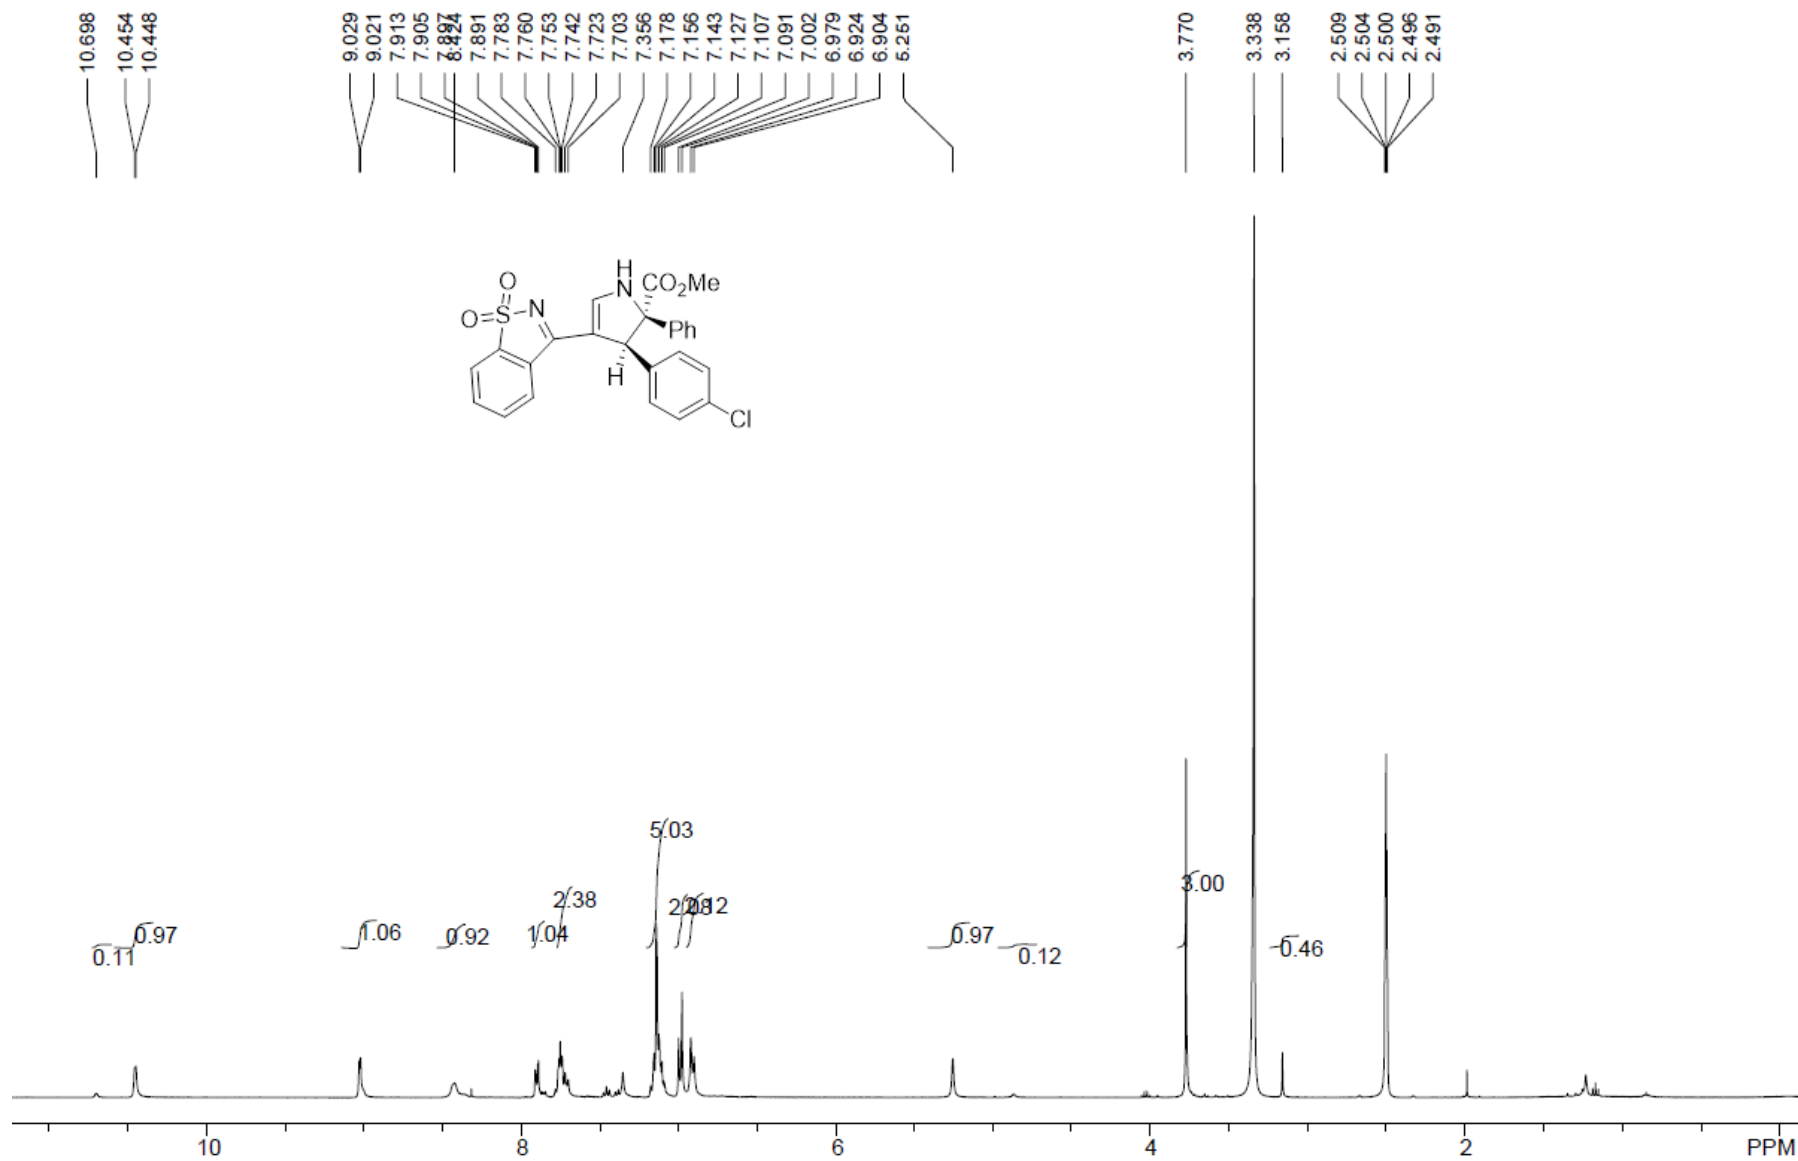

<sup>13</sup>C NMR of 4s

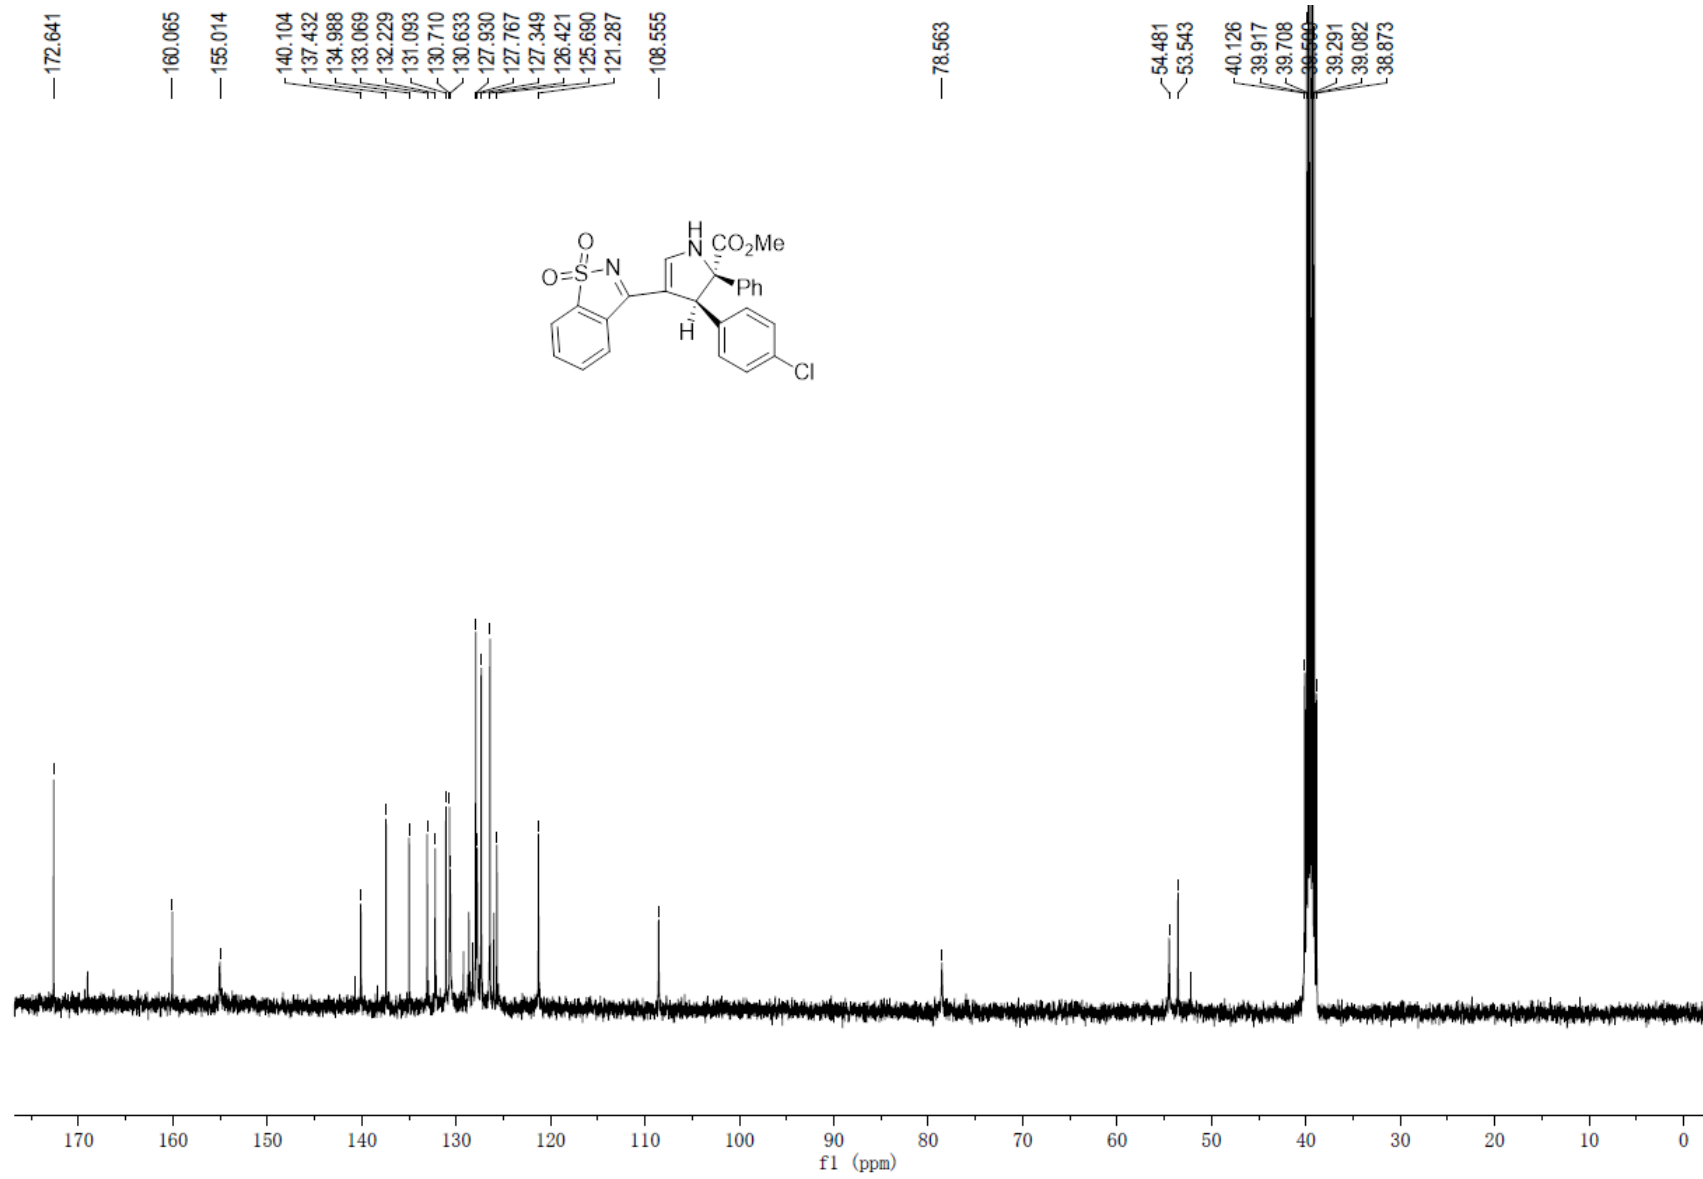

<sup>1</sup>H NMR of 4t

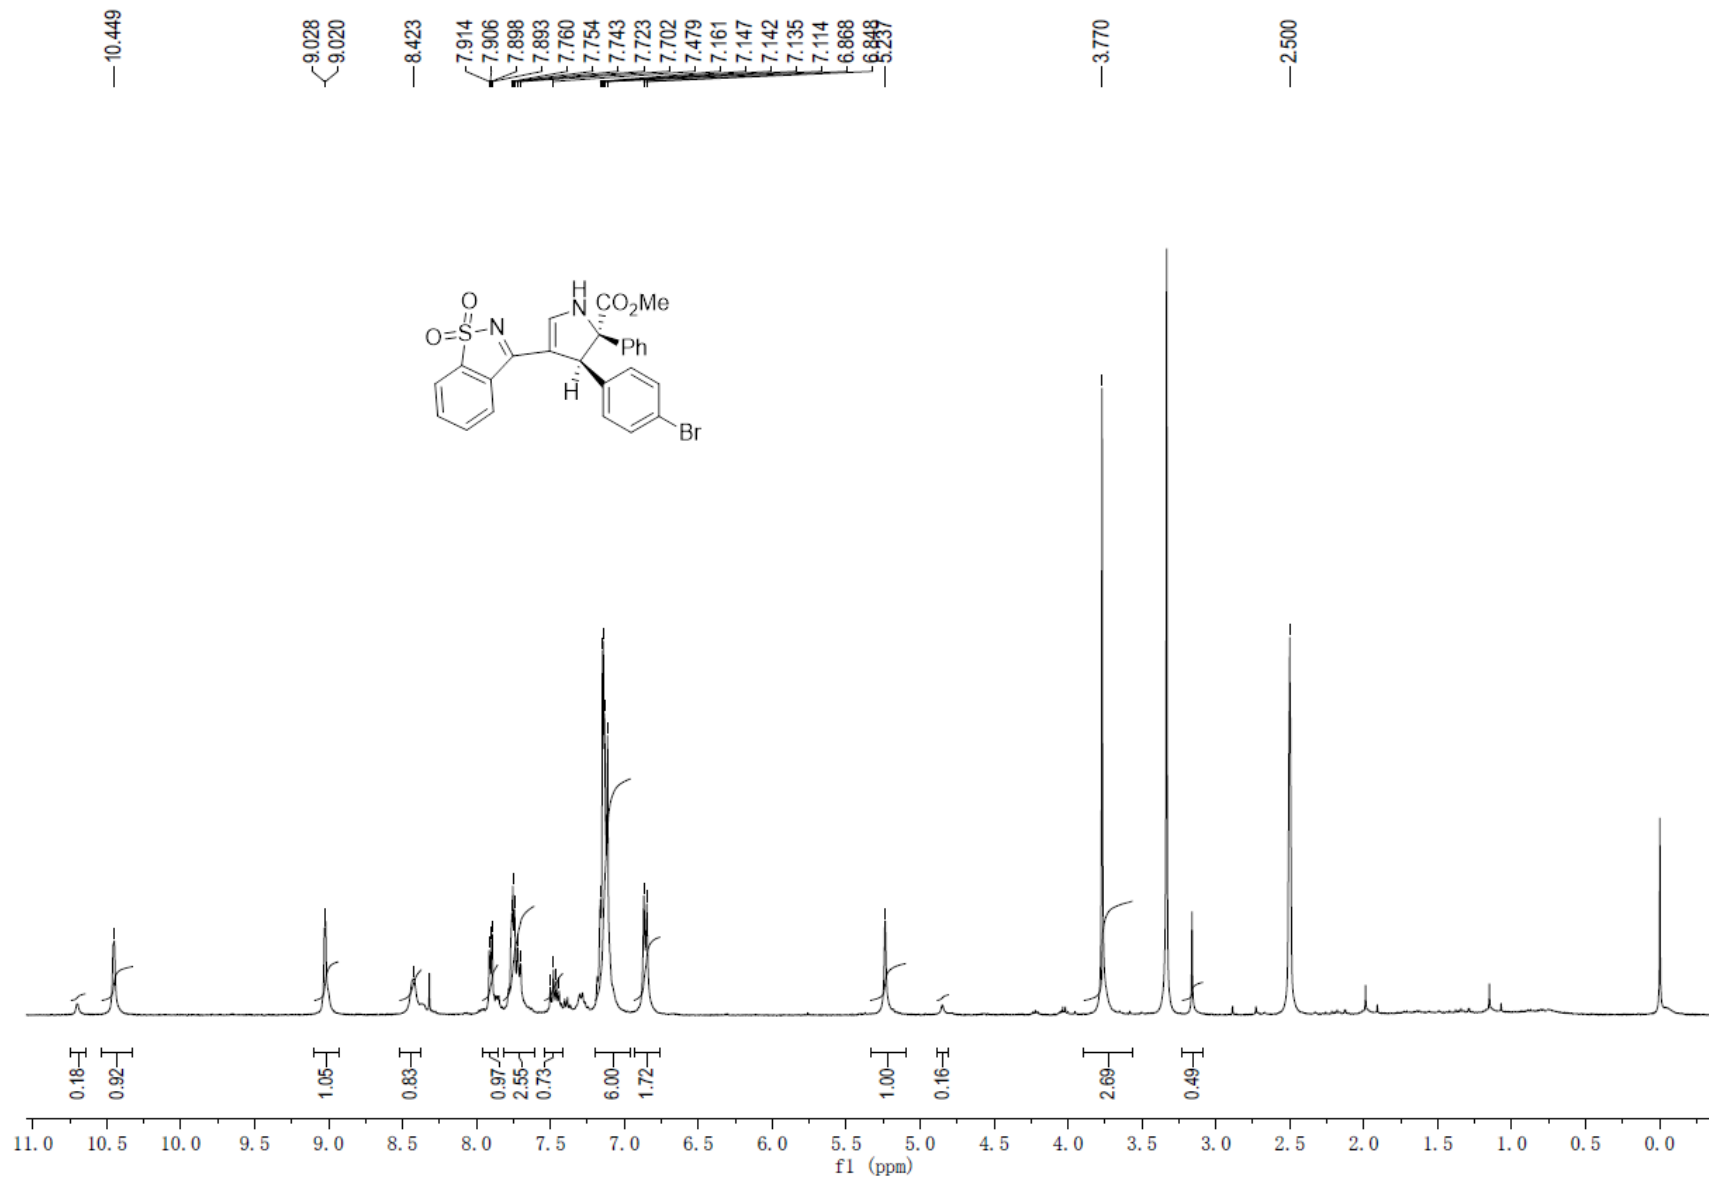

<sup>13</sup>C NMR of 4t

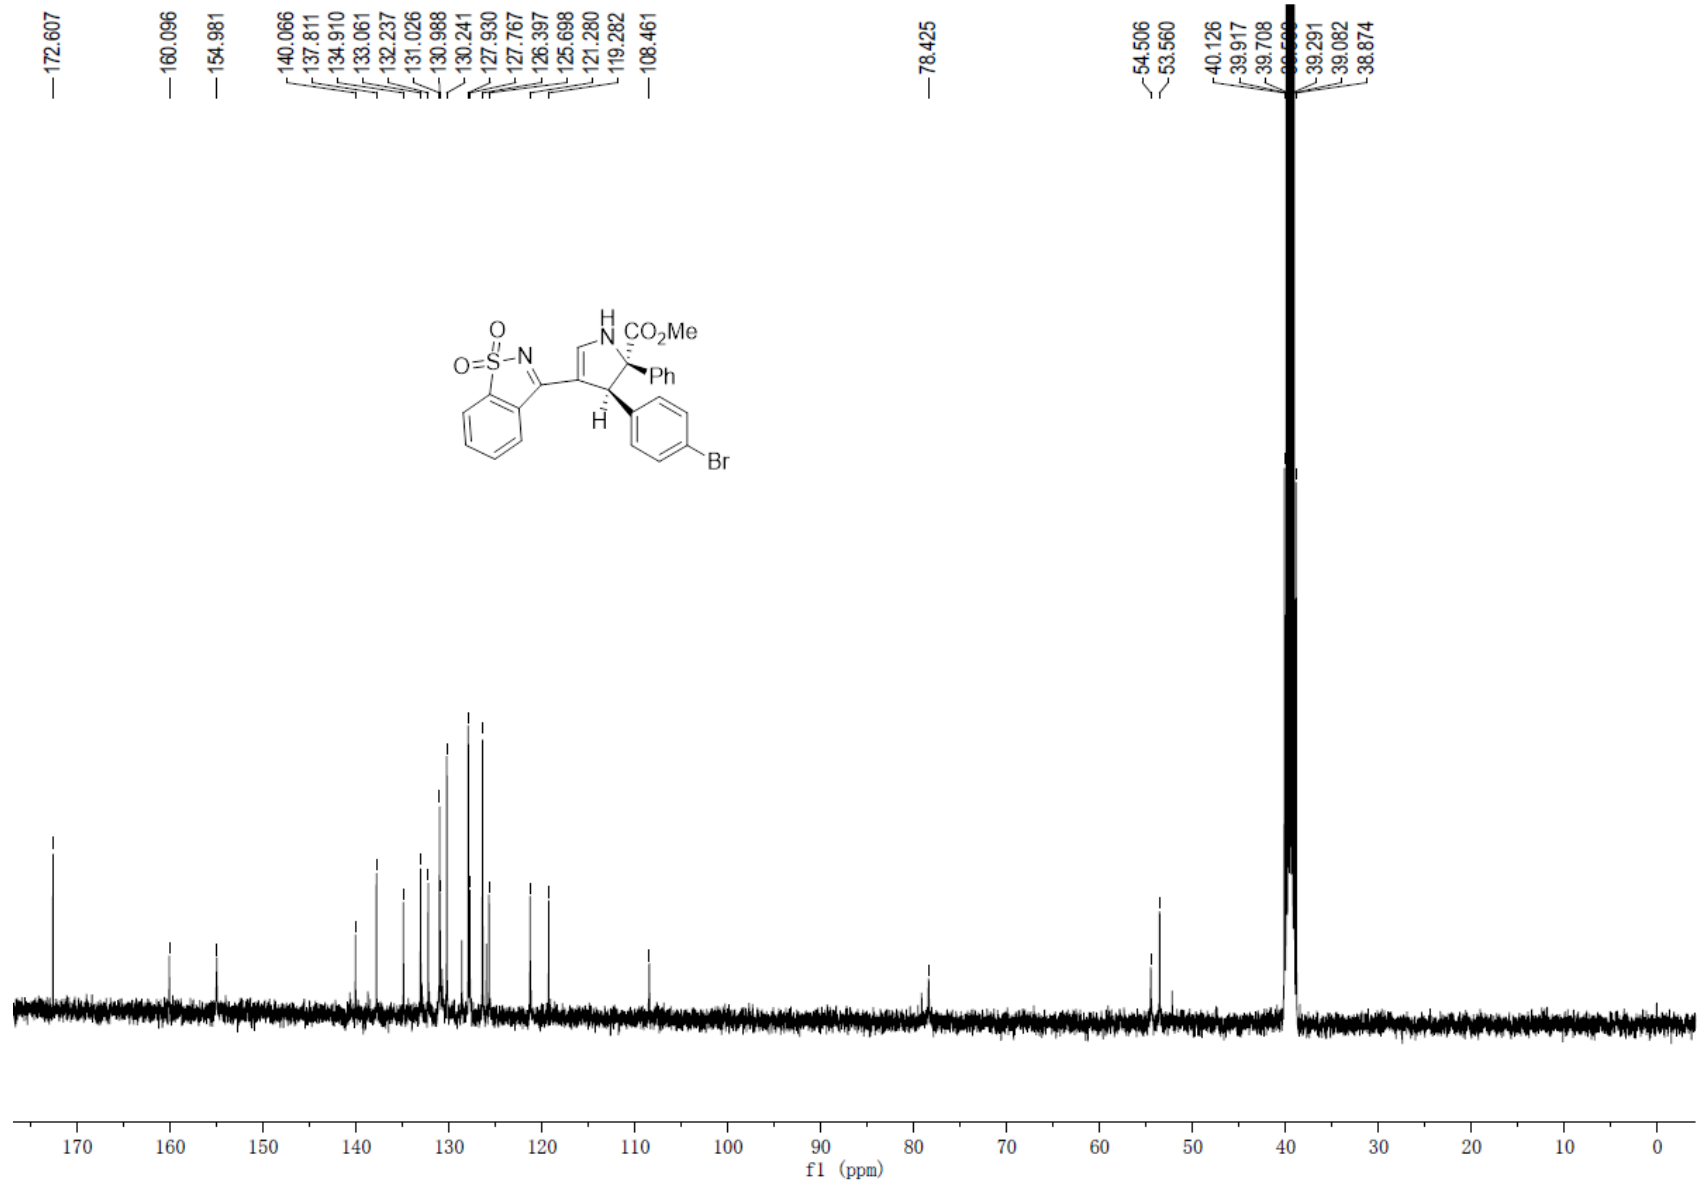

<sup>1</sup>H NMR of **4u**

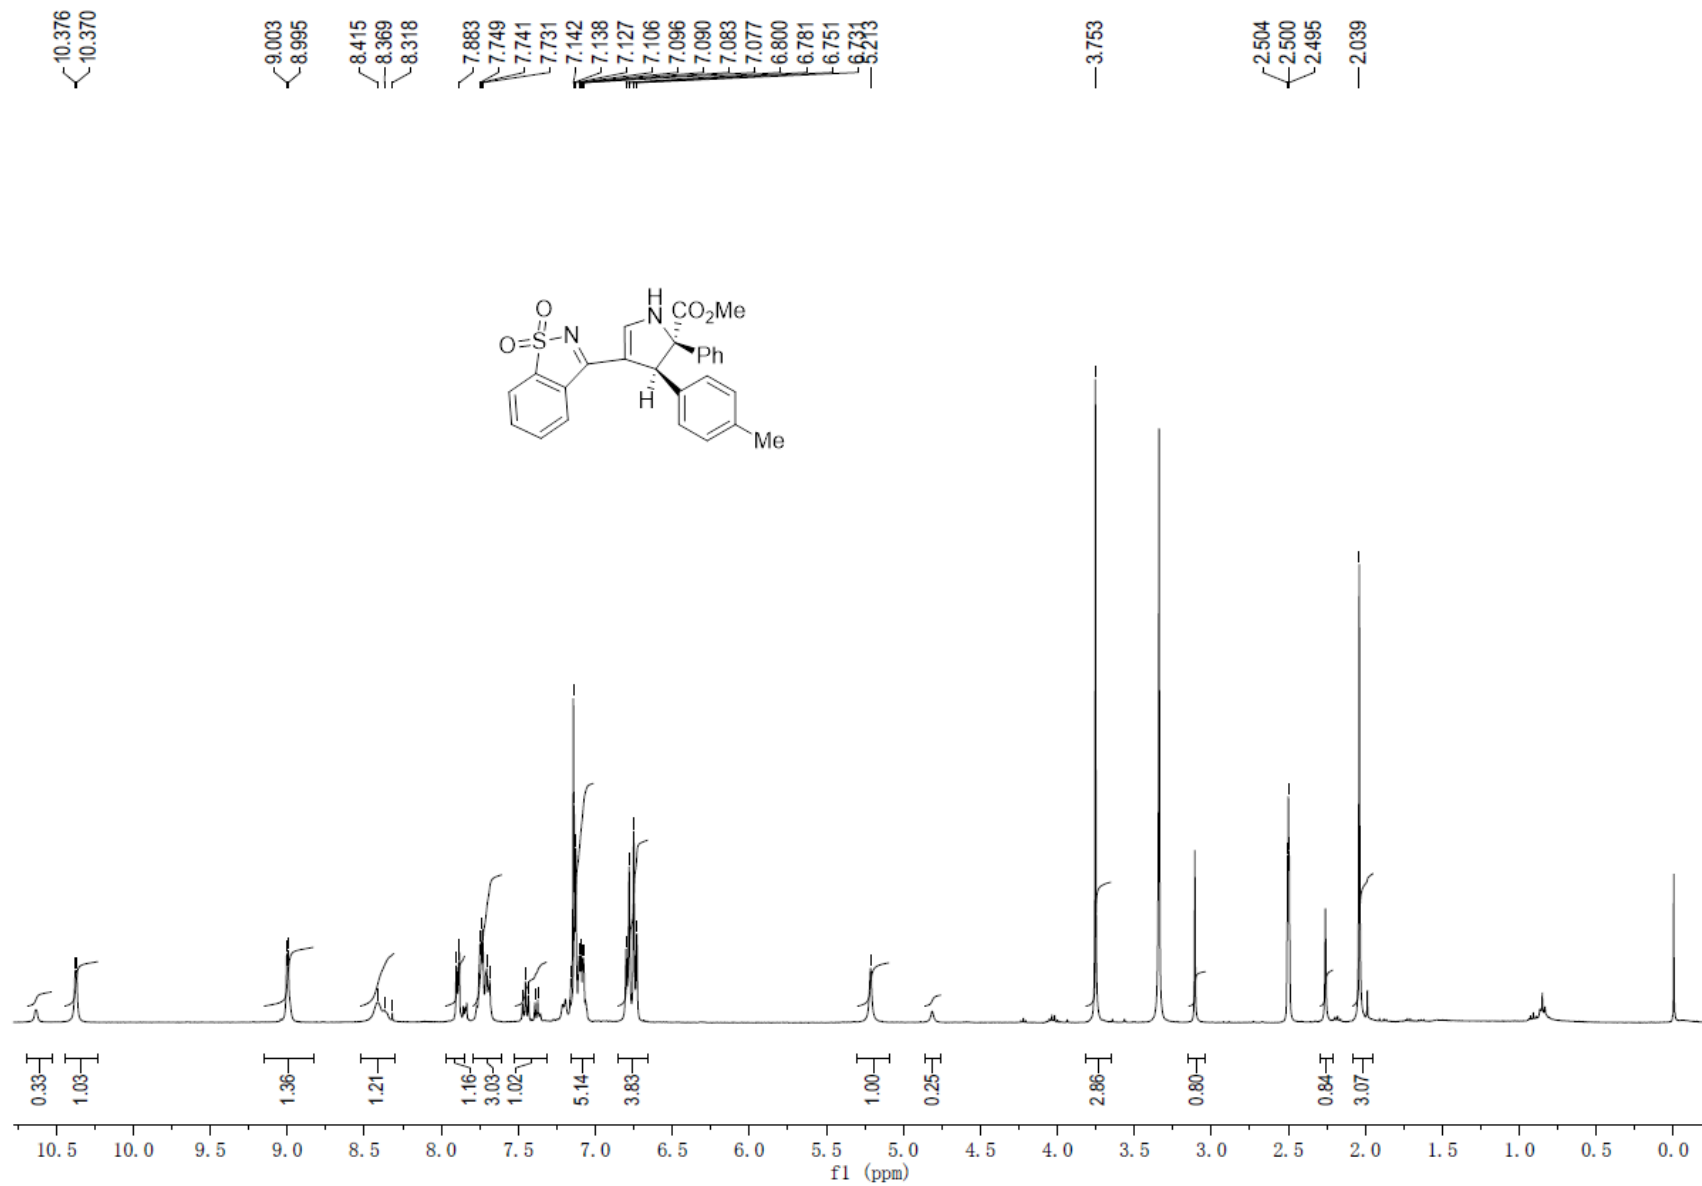



<sup>13</sup>C NMR of **4u**

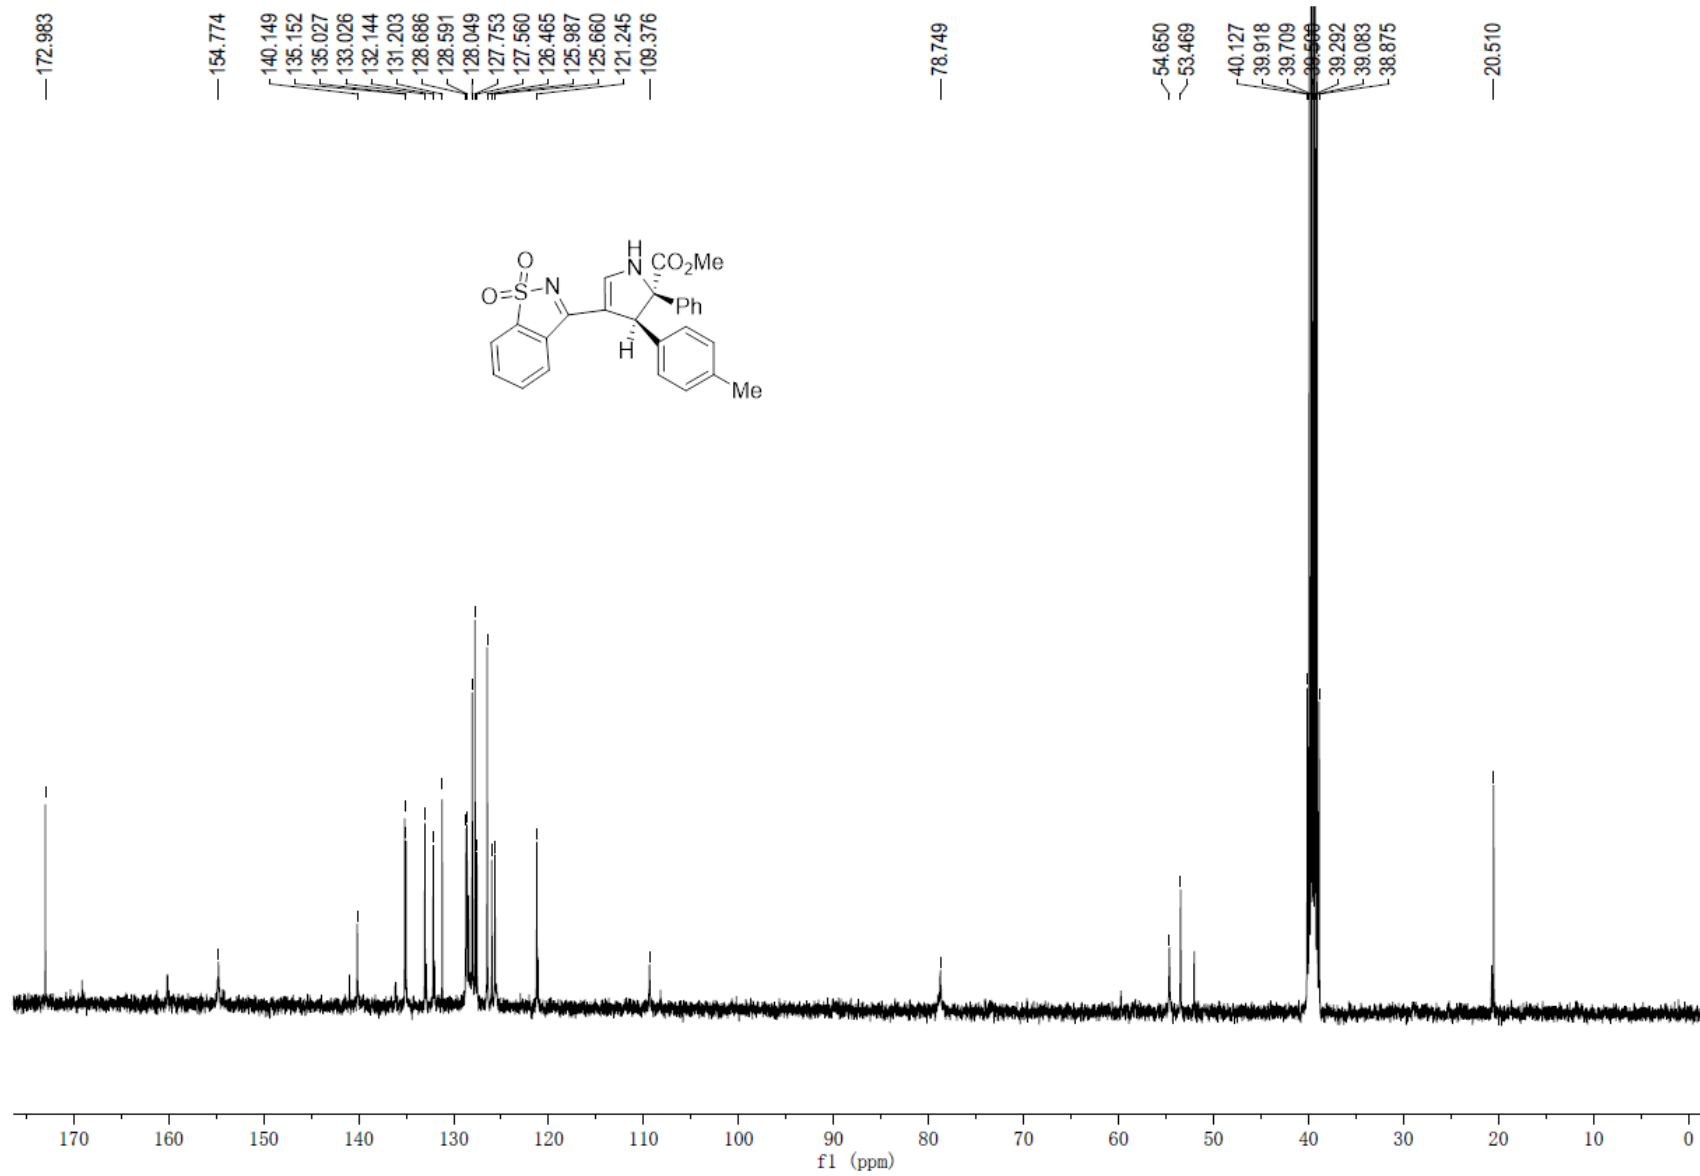

<sup>1</sup>H NMR of 4v

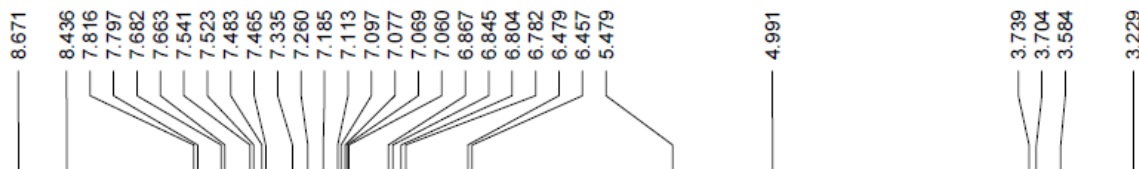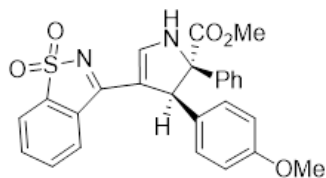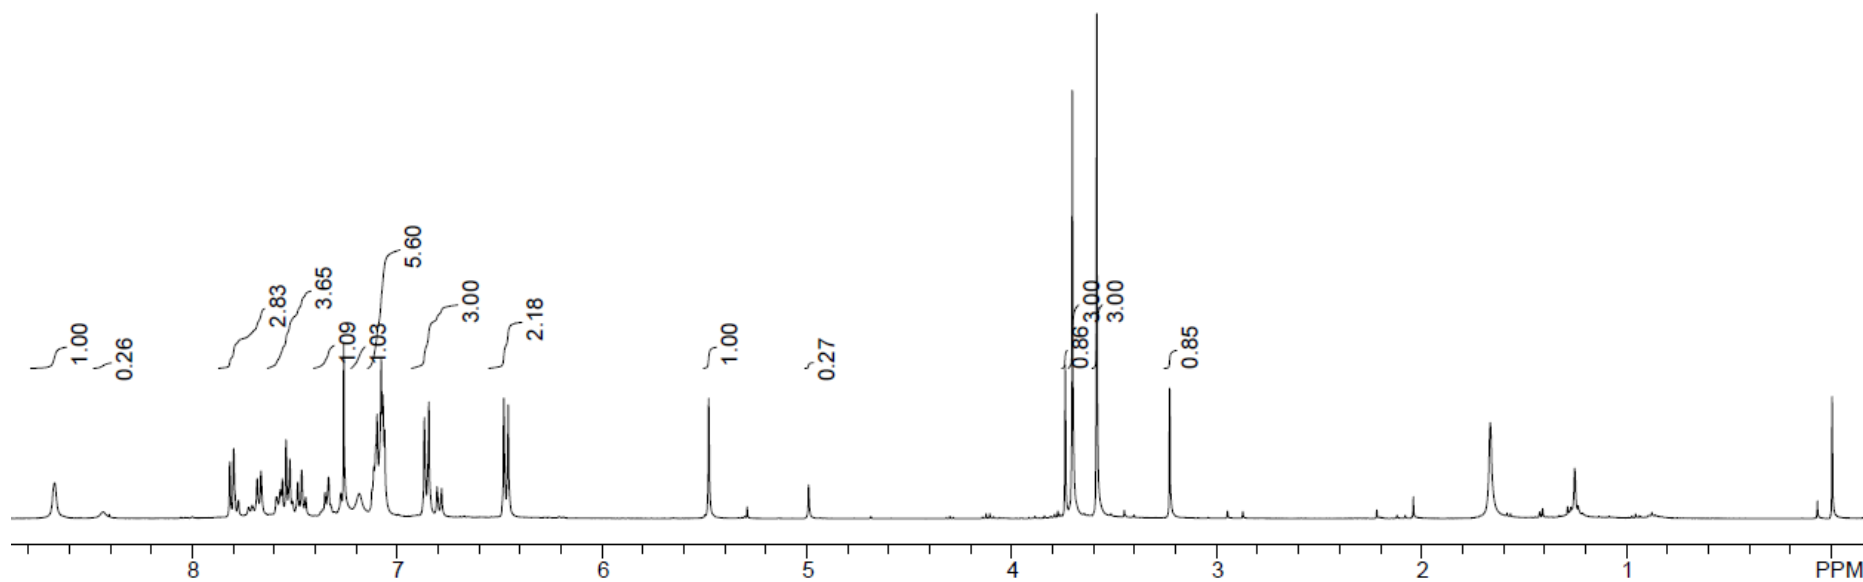

<sup>13</sup>C NMR of 4v

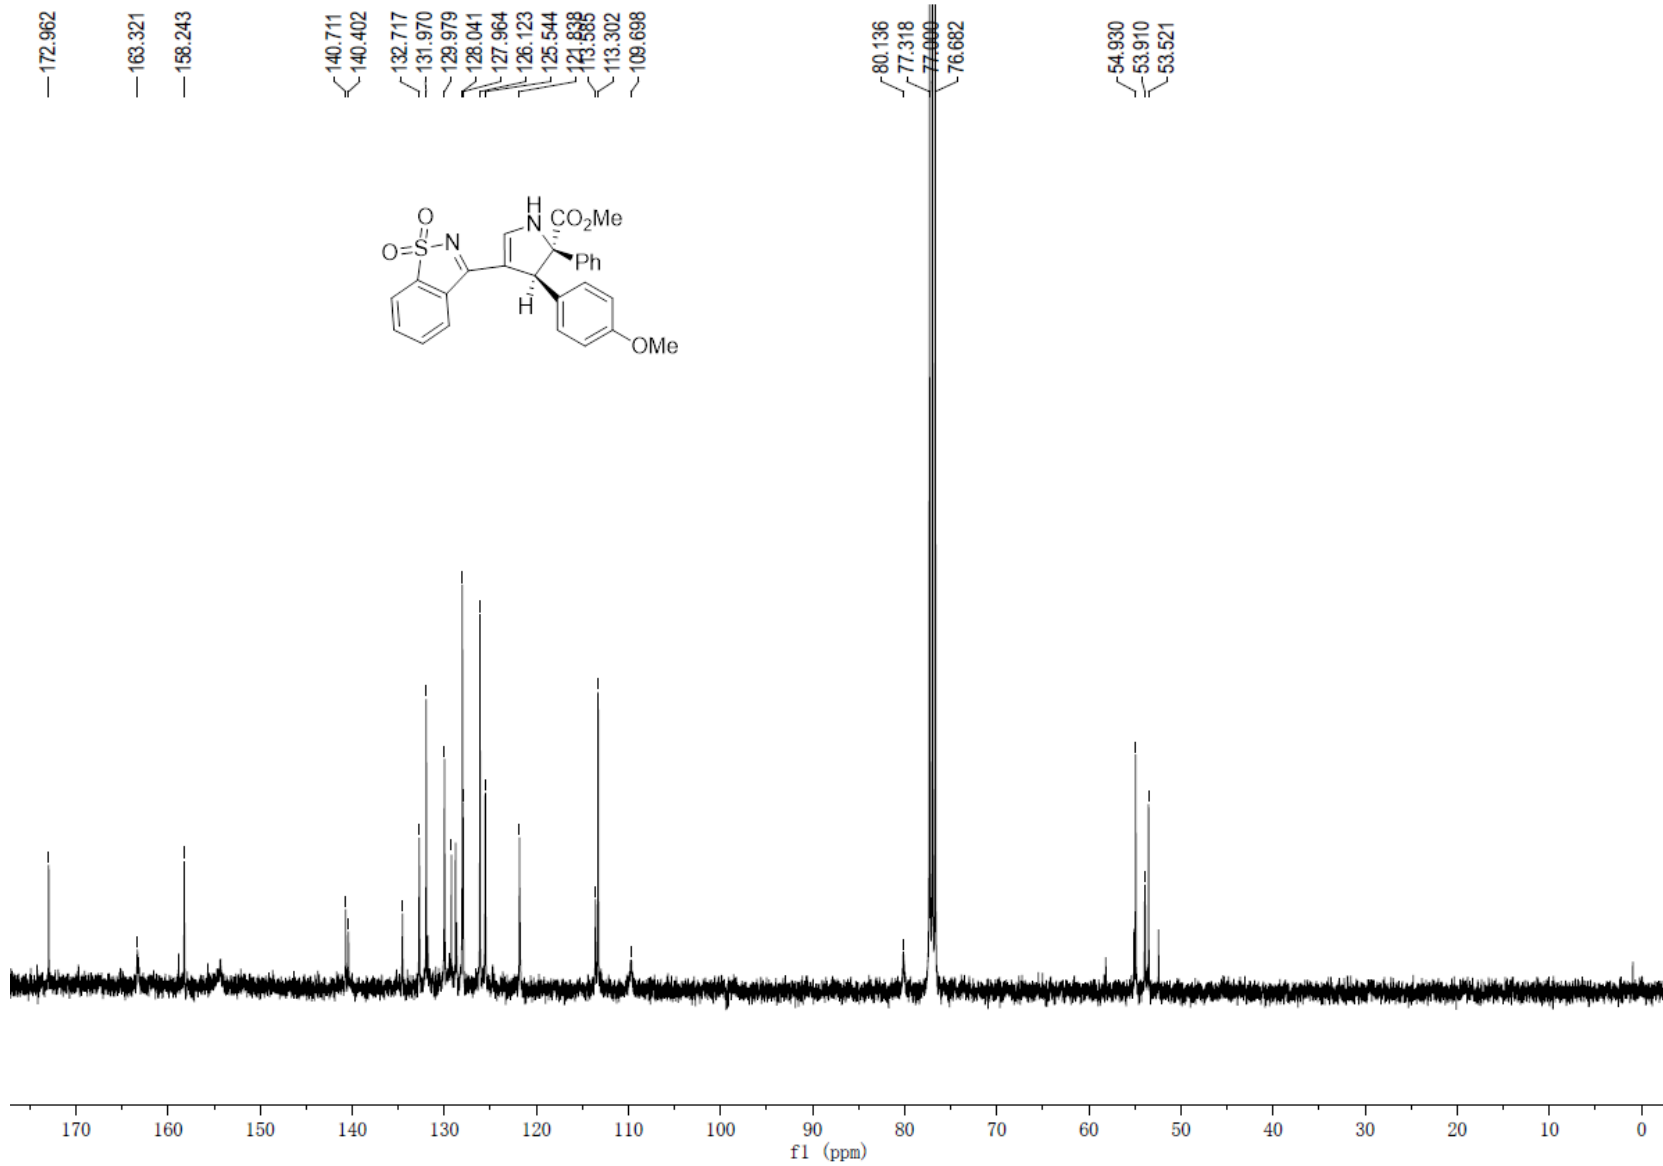

<sup>1</sup>H NMR of 4w

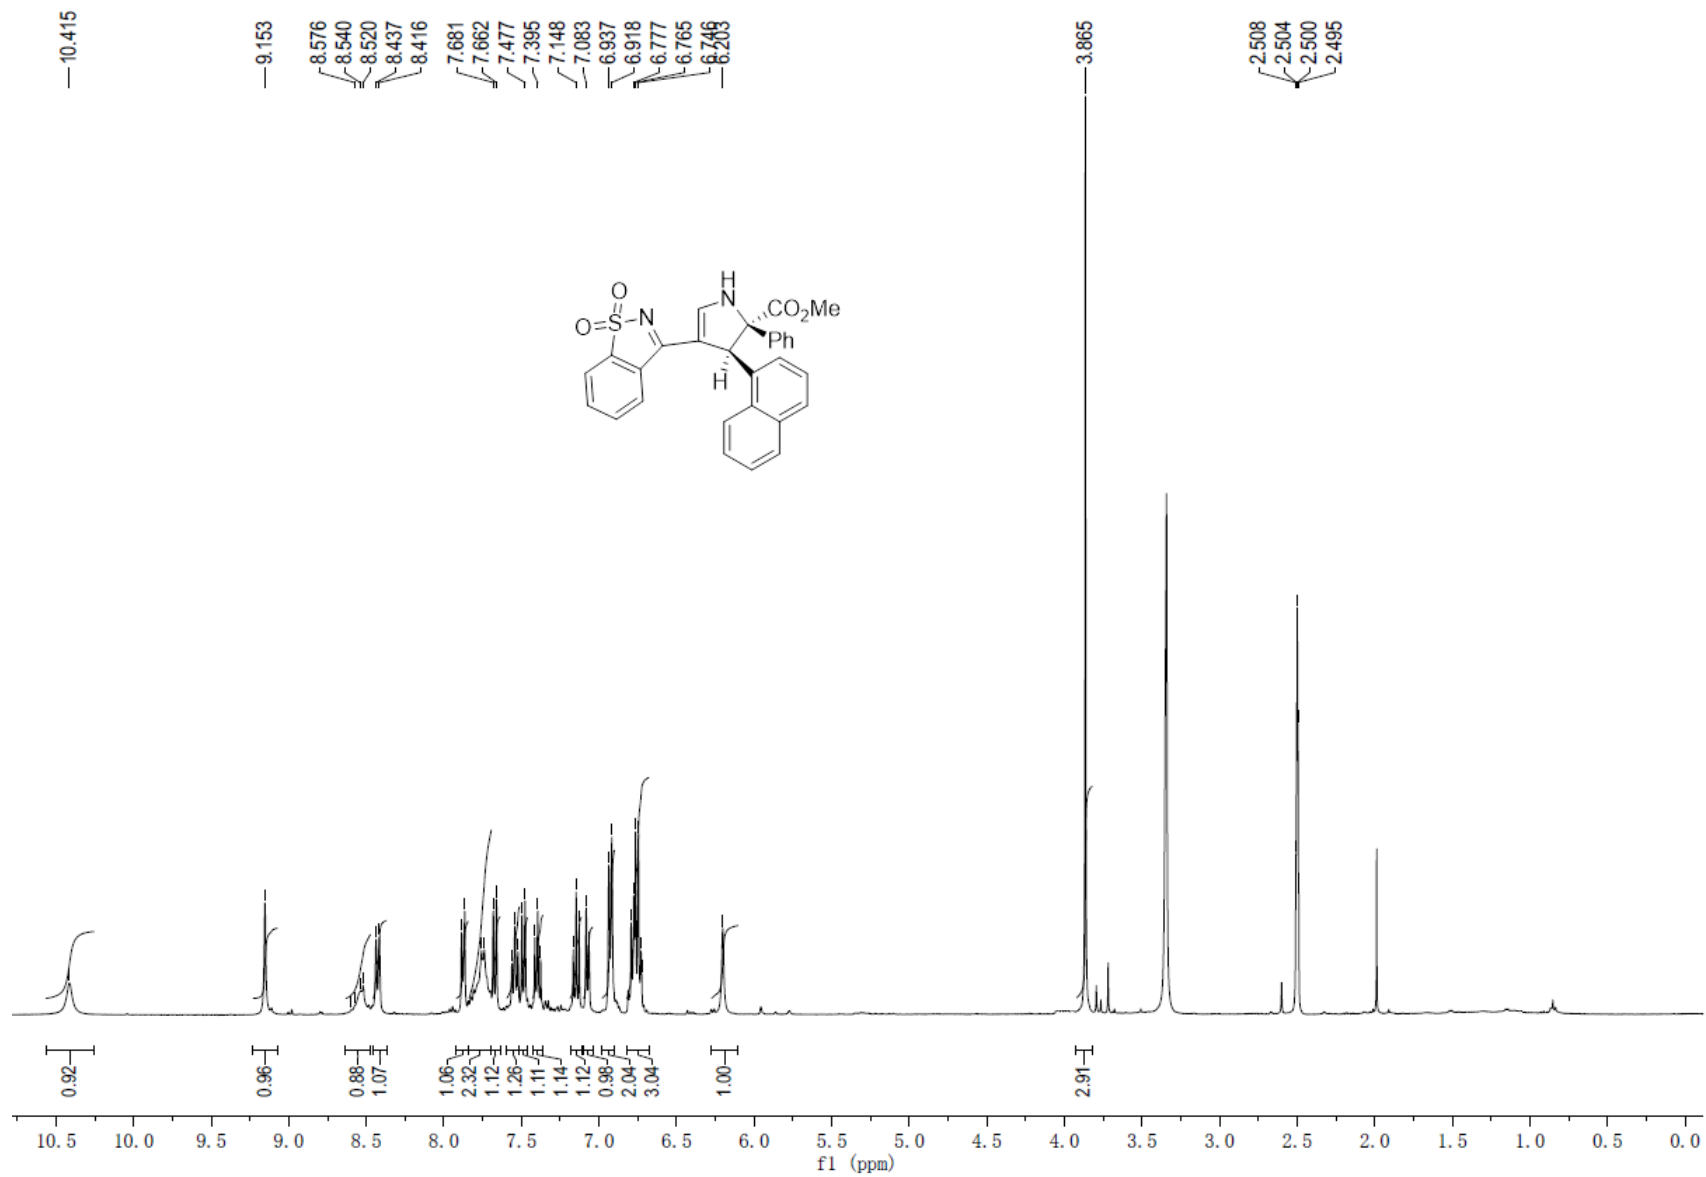

<sup>13</sup>C NMR of **4w**

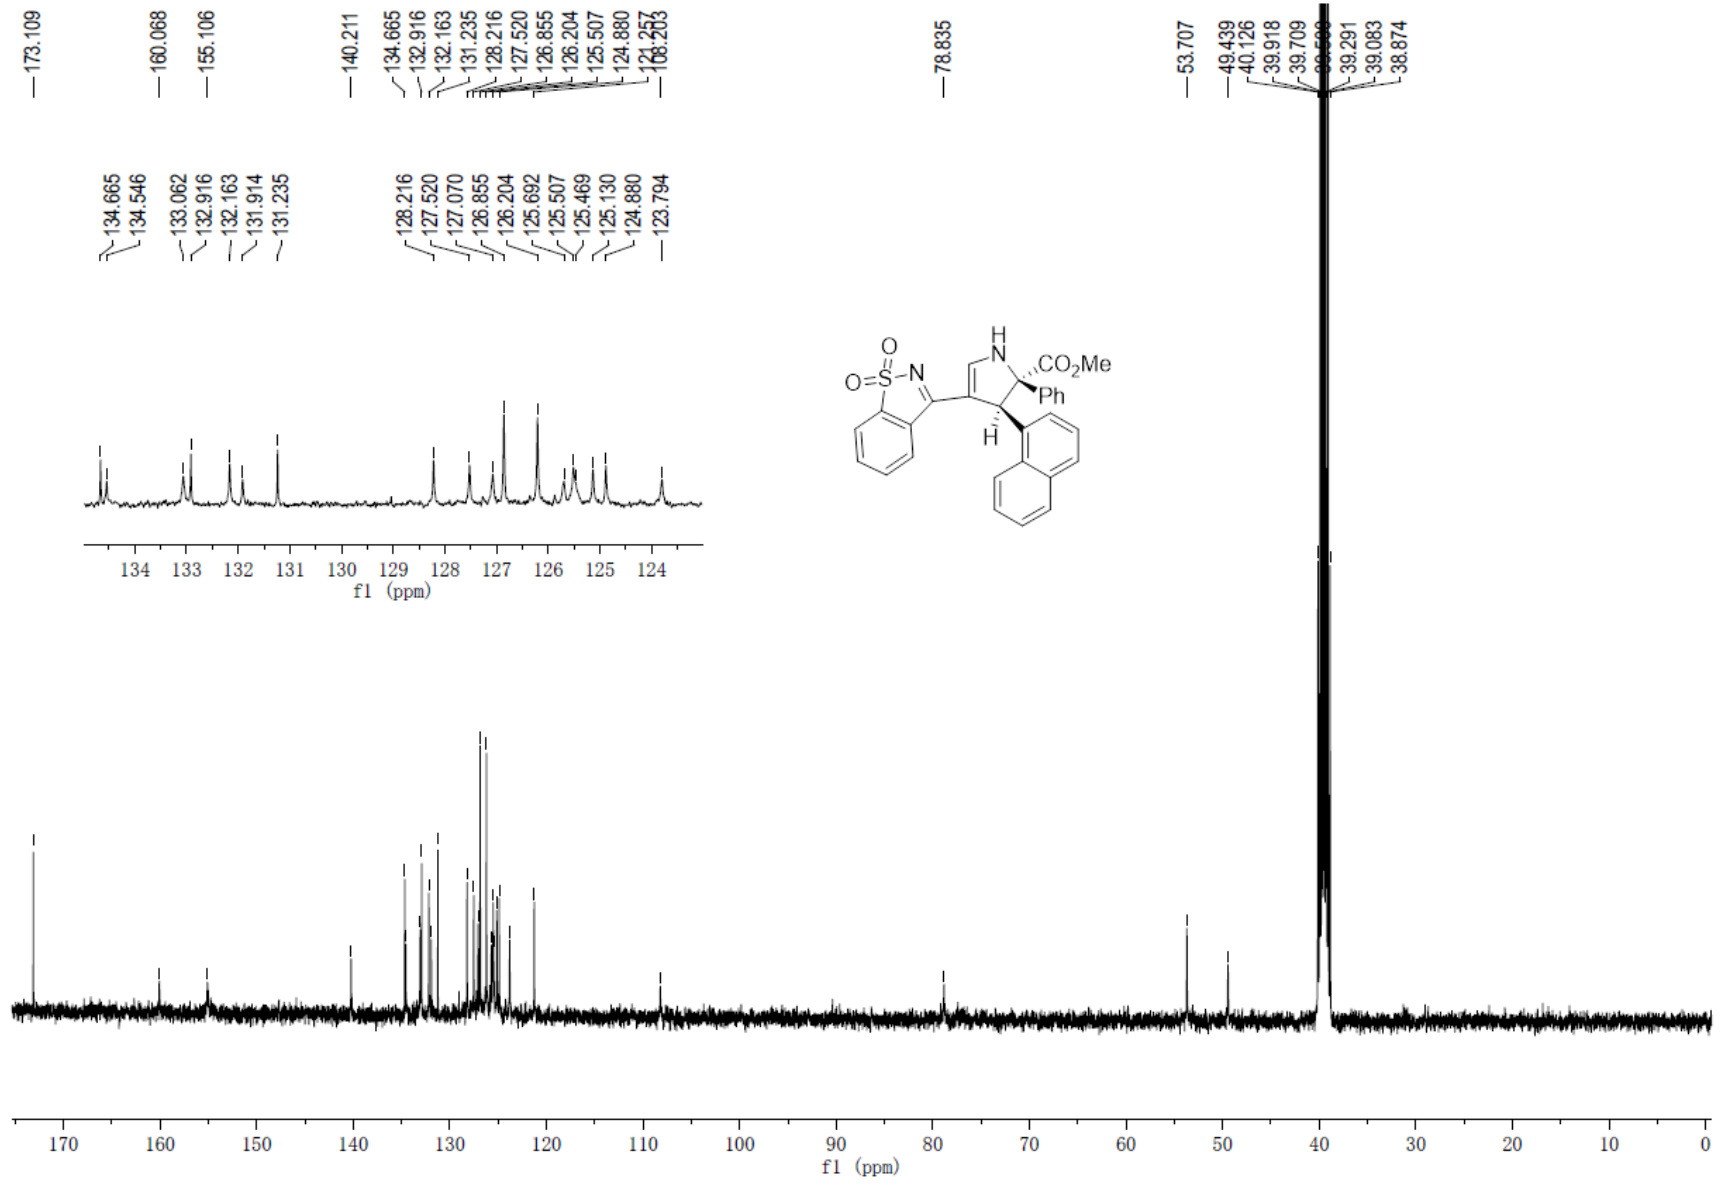

<sup>1</sup>H NMR of 4x

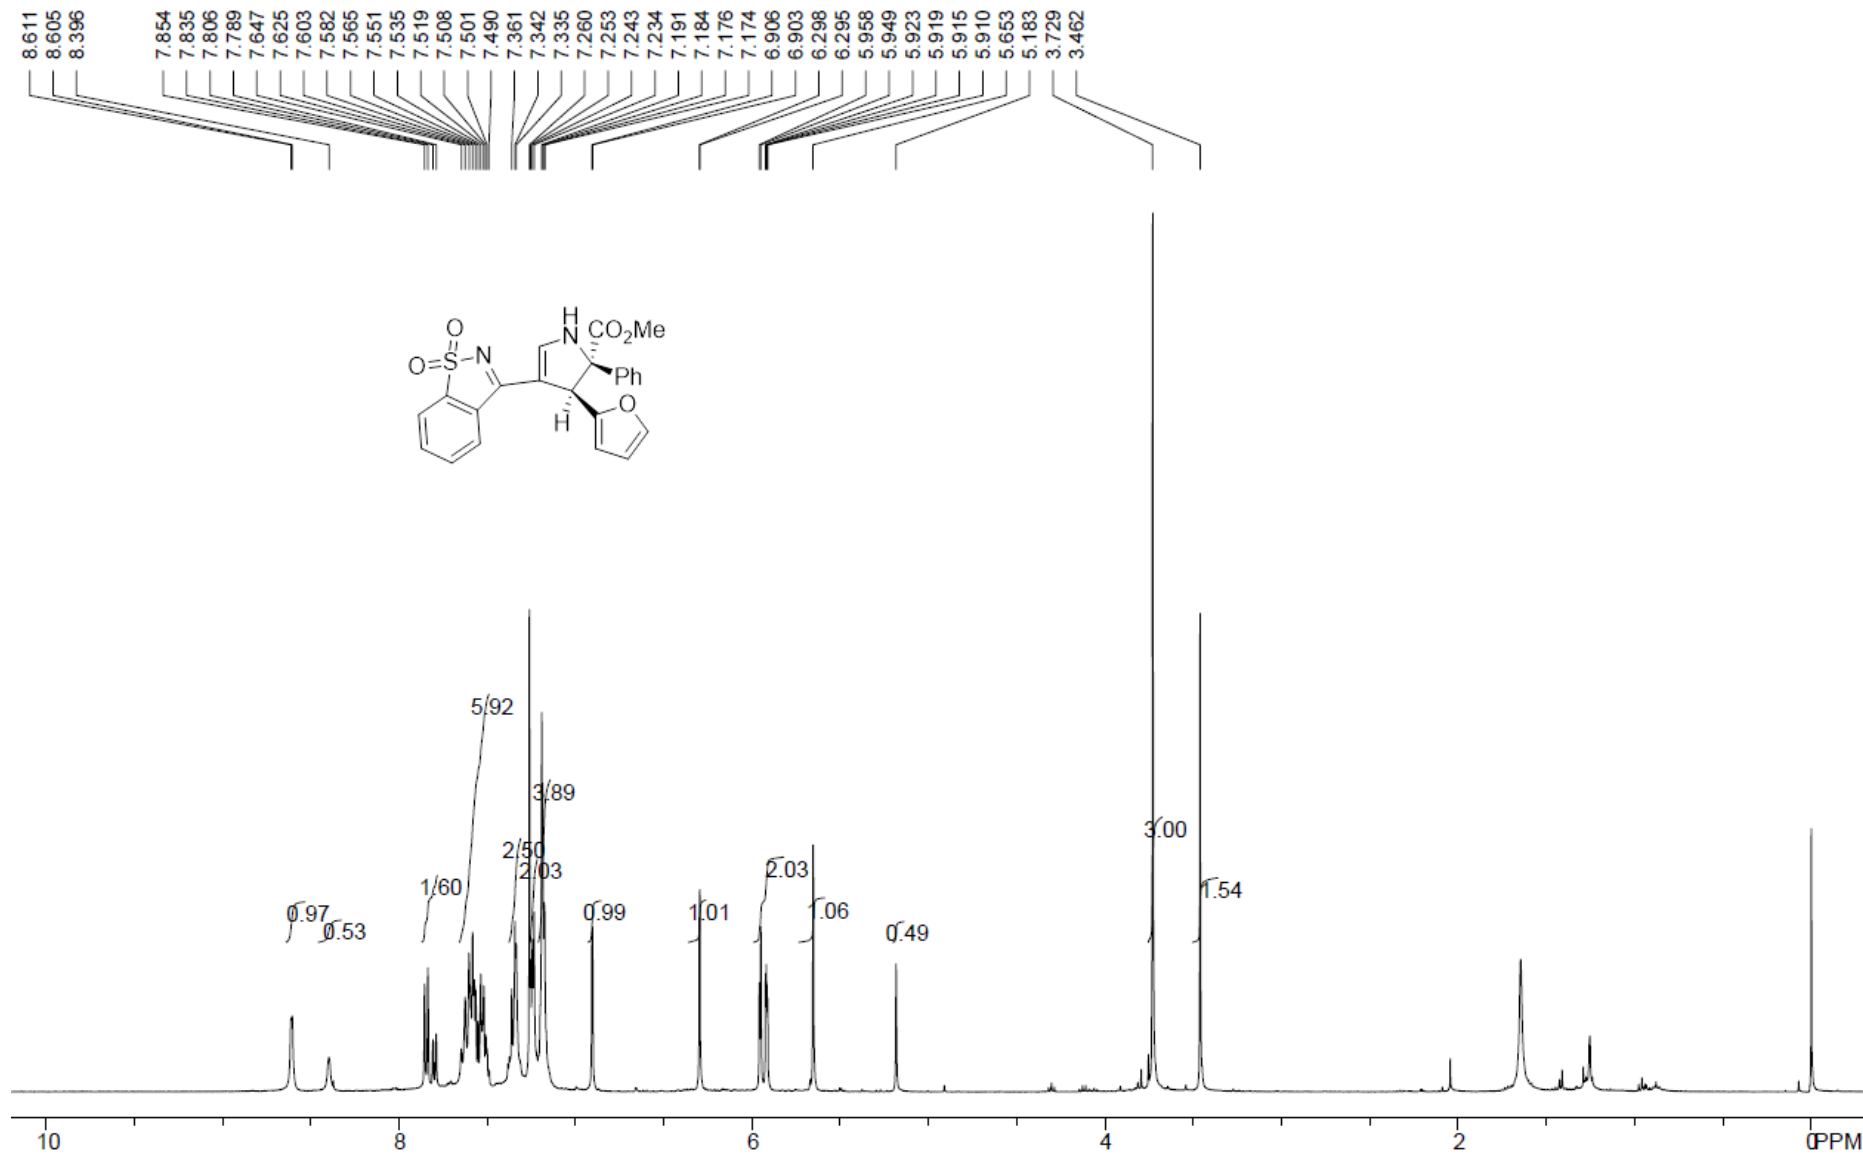

<sup>13</sup>C NMR of 4x

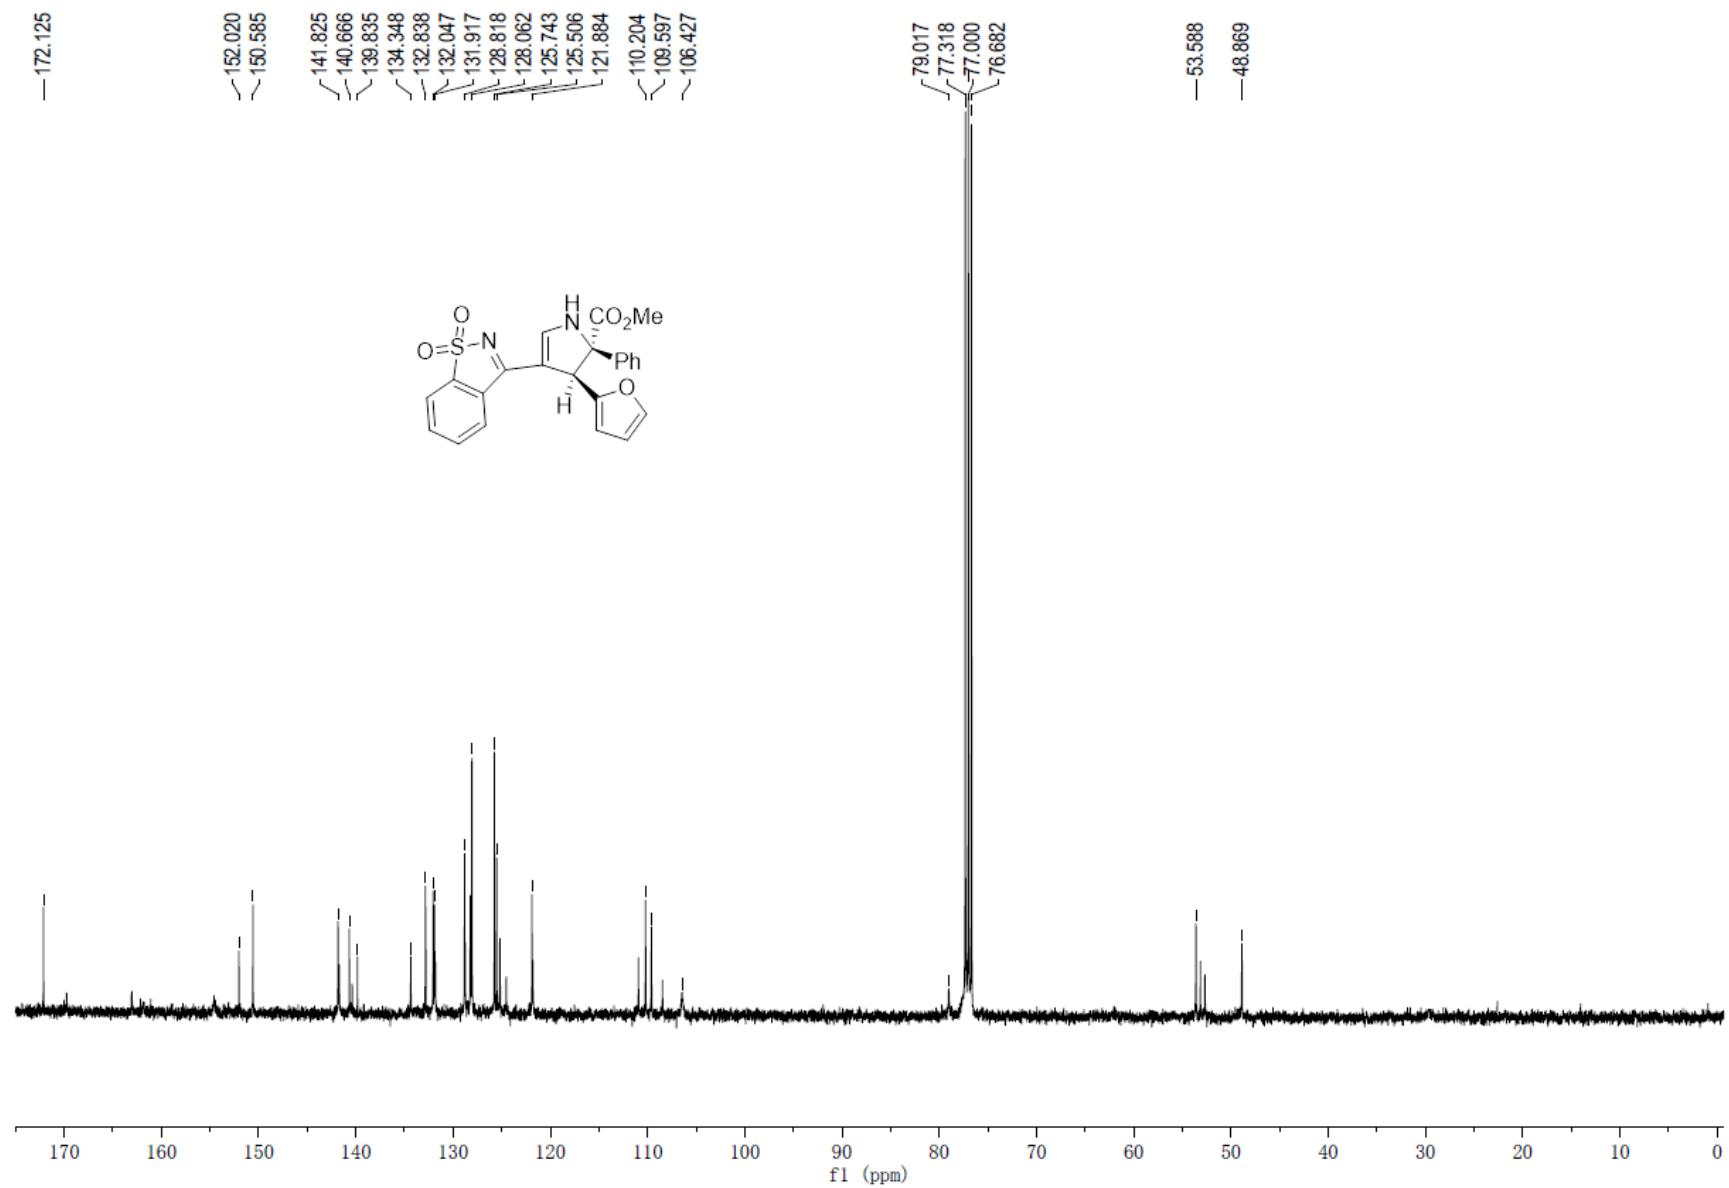

<sup>1</sup>H NMR of 4y

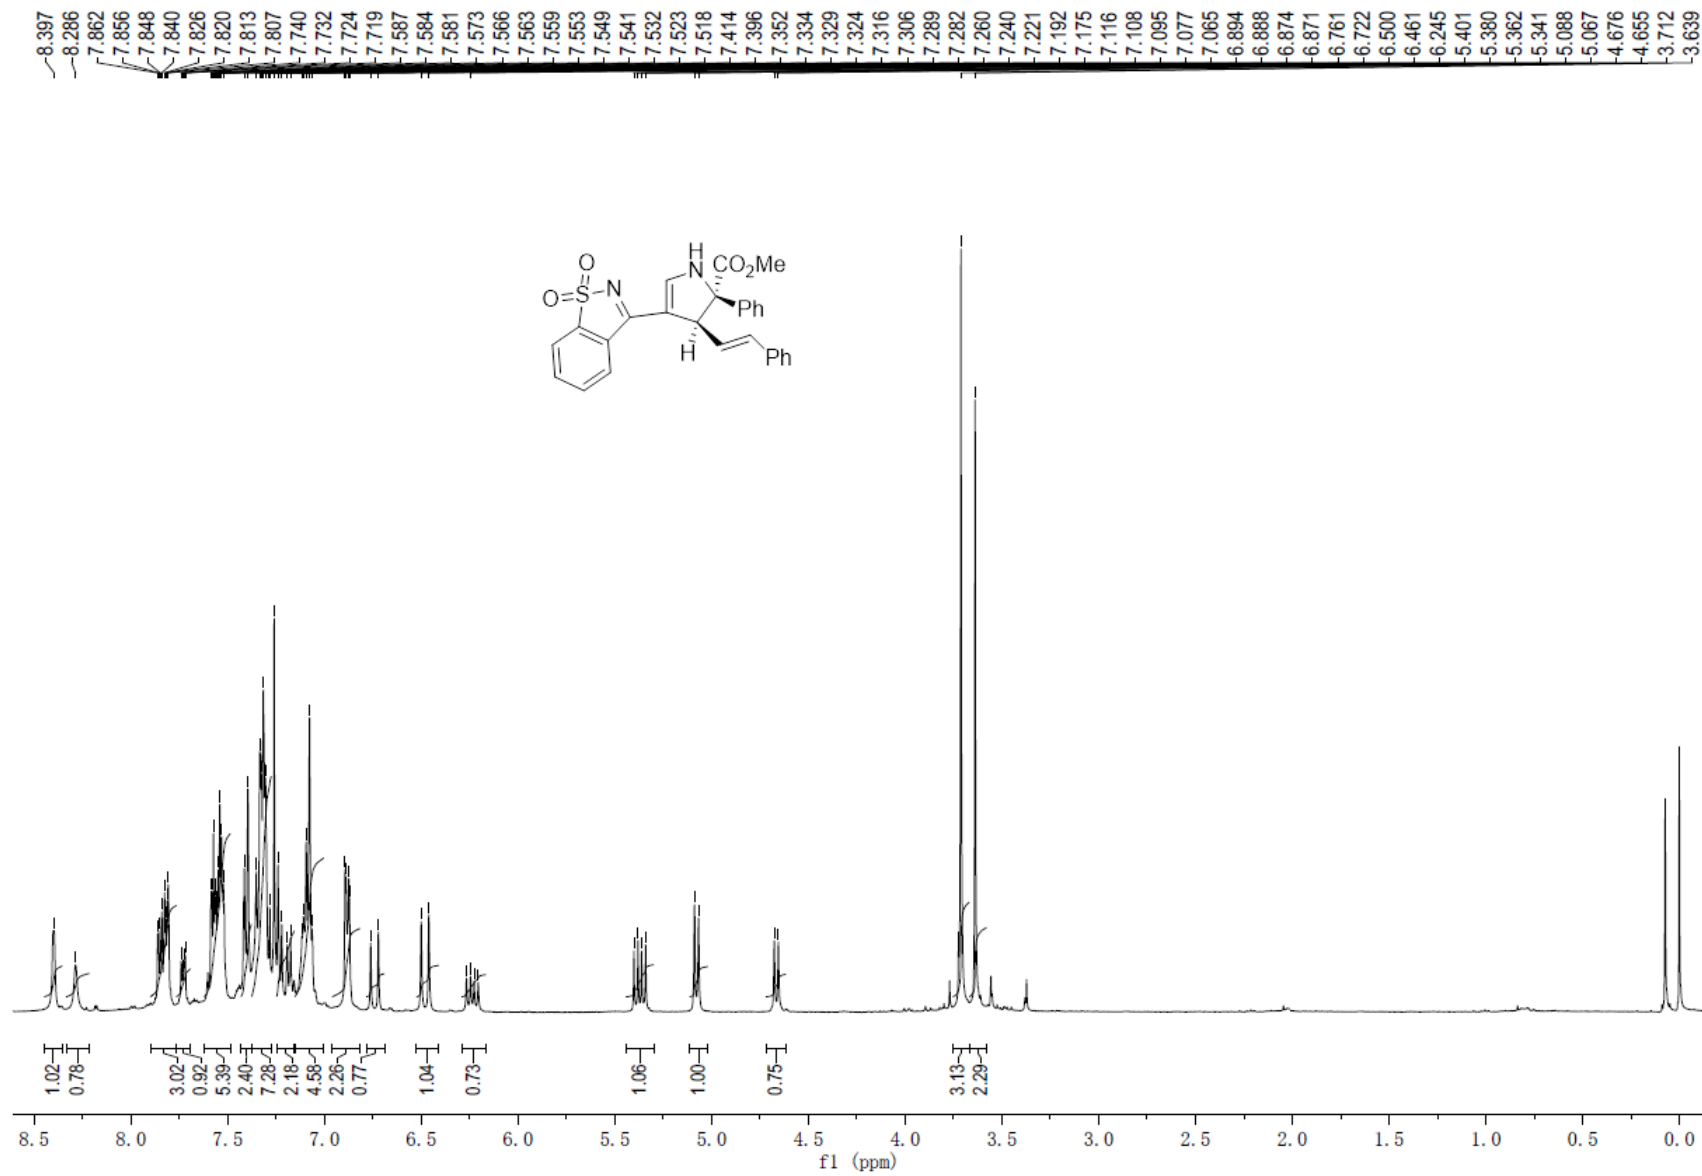



<sup>13</sup>C NMR of 4y

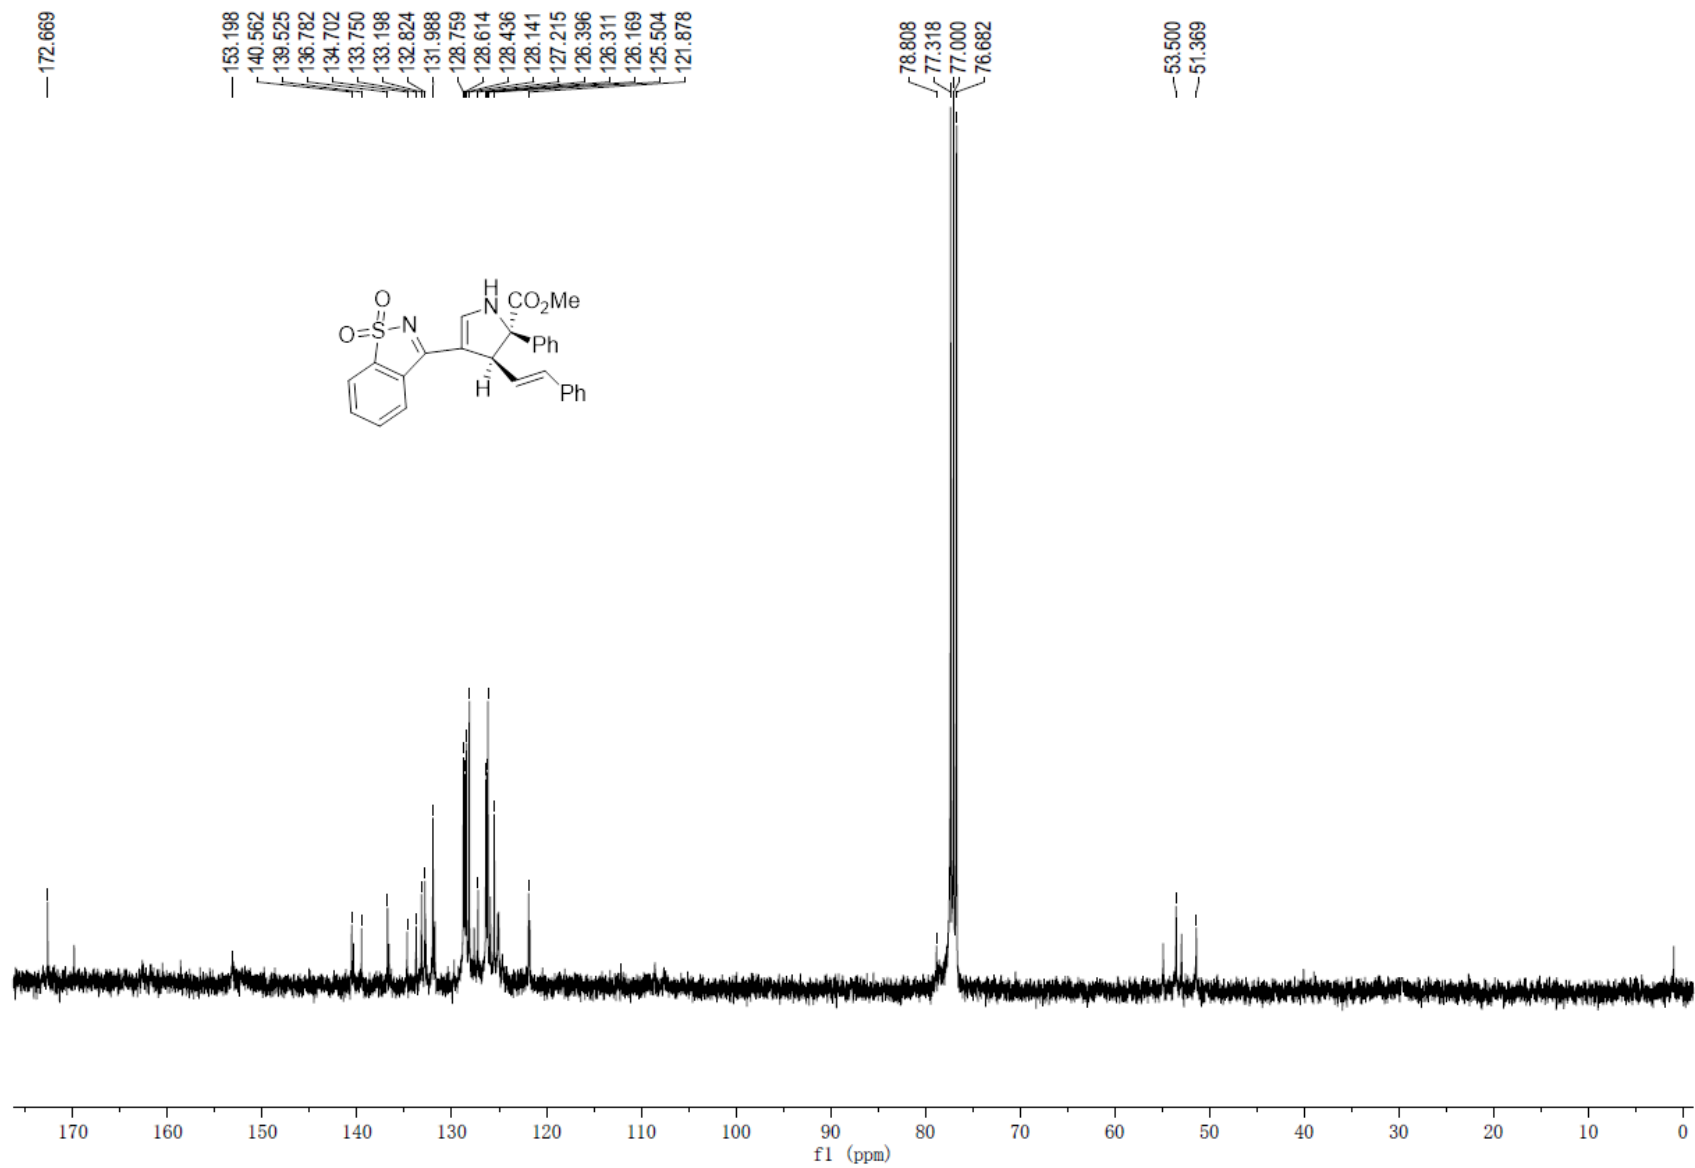

<sup>1</sup>H NMR of 4z

7.845  
7.827  
7.696  
7.667  
7.648  
7.624  
7.606  
7.467  
7.449  
7.430  
7.422  
7.403  
7.384  
7.260  
7.243  
7.210  
7.192  
7.187  
7.133  
7.115  
7.096  
7.064  
7.046  
7.027

5.291  
5.265  
5.249

3.886  
3.876  
3.869  
3.859  
3.482  
3.469  
3.386  
3.376

1.324  
1.262

*Handwritten integration curves for the aromatic region (7.0-7.9 ppm).*

*Handwritten integration curve for the methine proton (5.2 ppm).*

*Handwritten integration curves for the methoxy and methyl groups (3.3-3.9 ppm).*

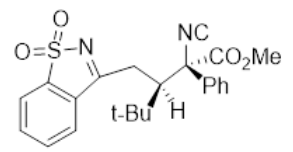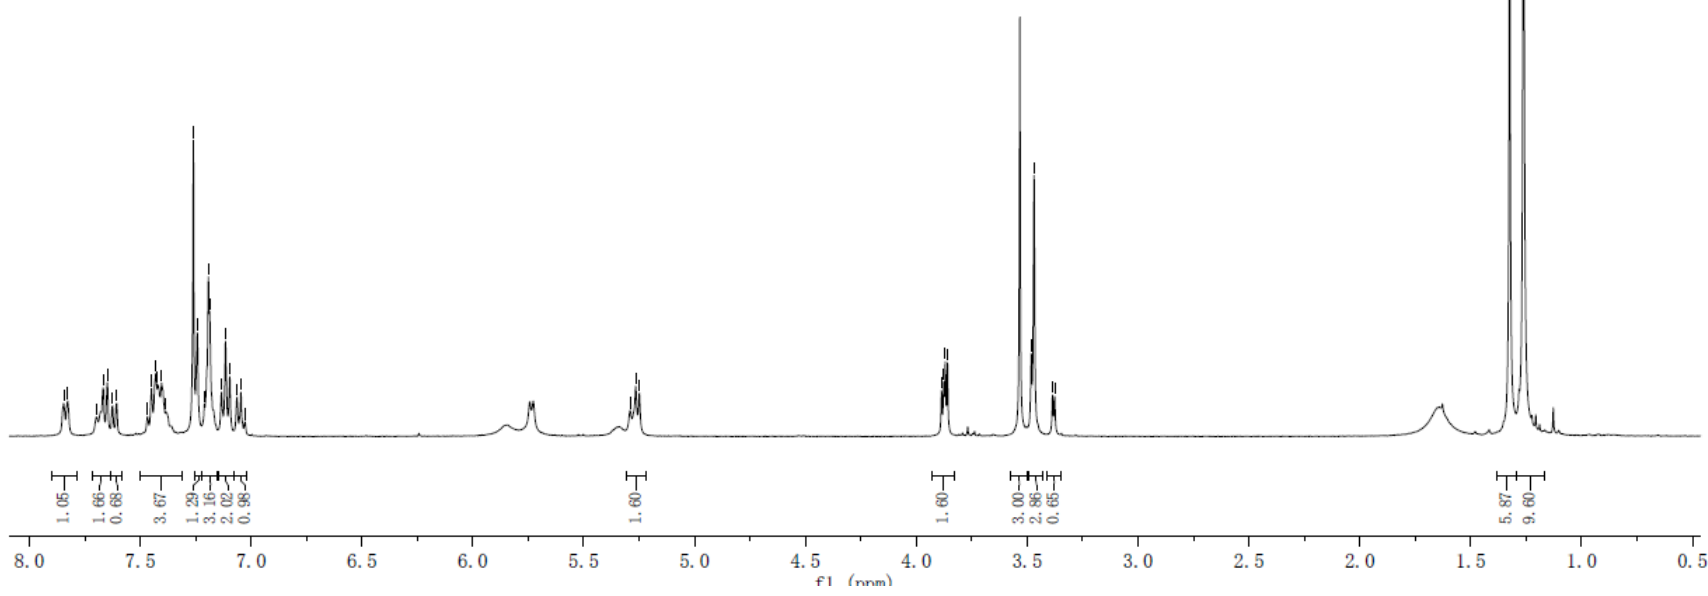

<sup>13</sup>C NMR of 4z

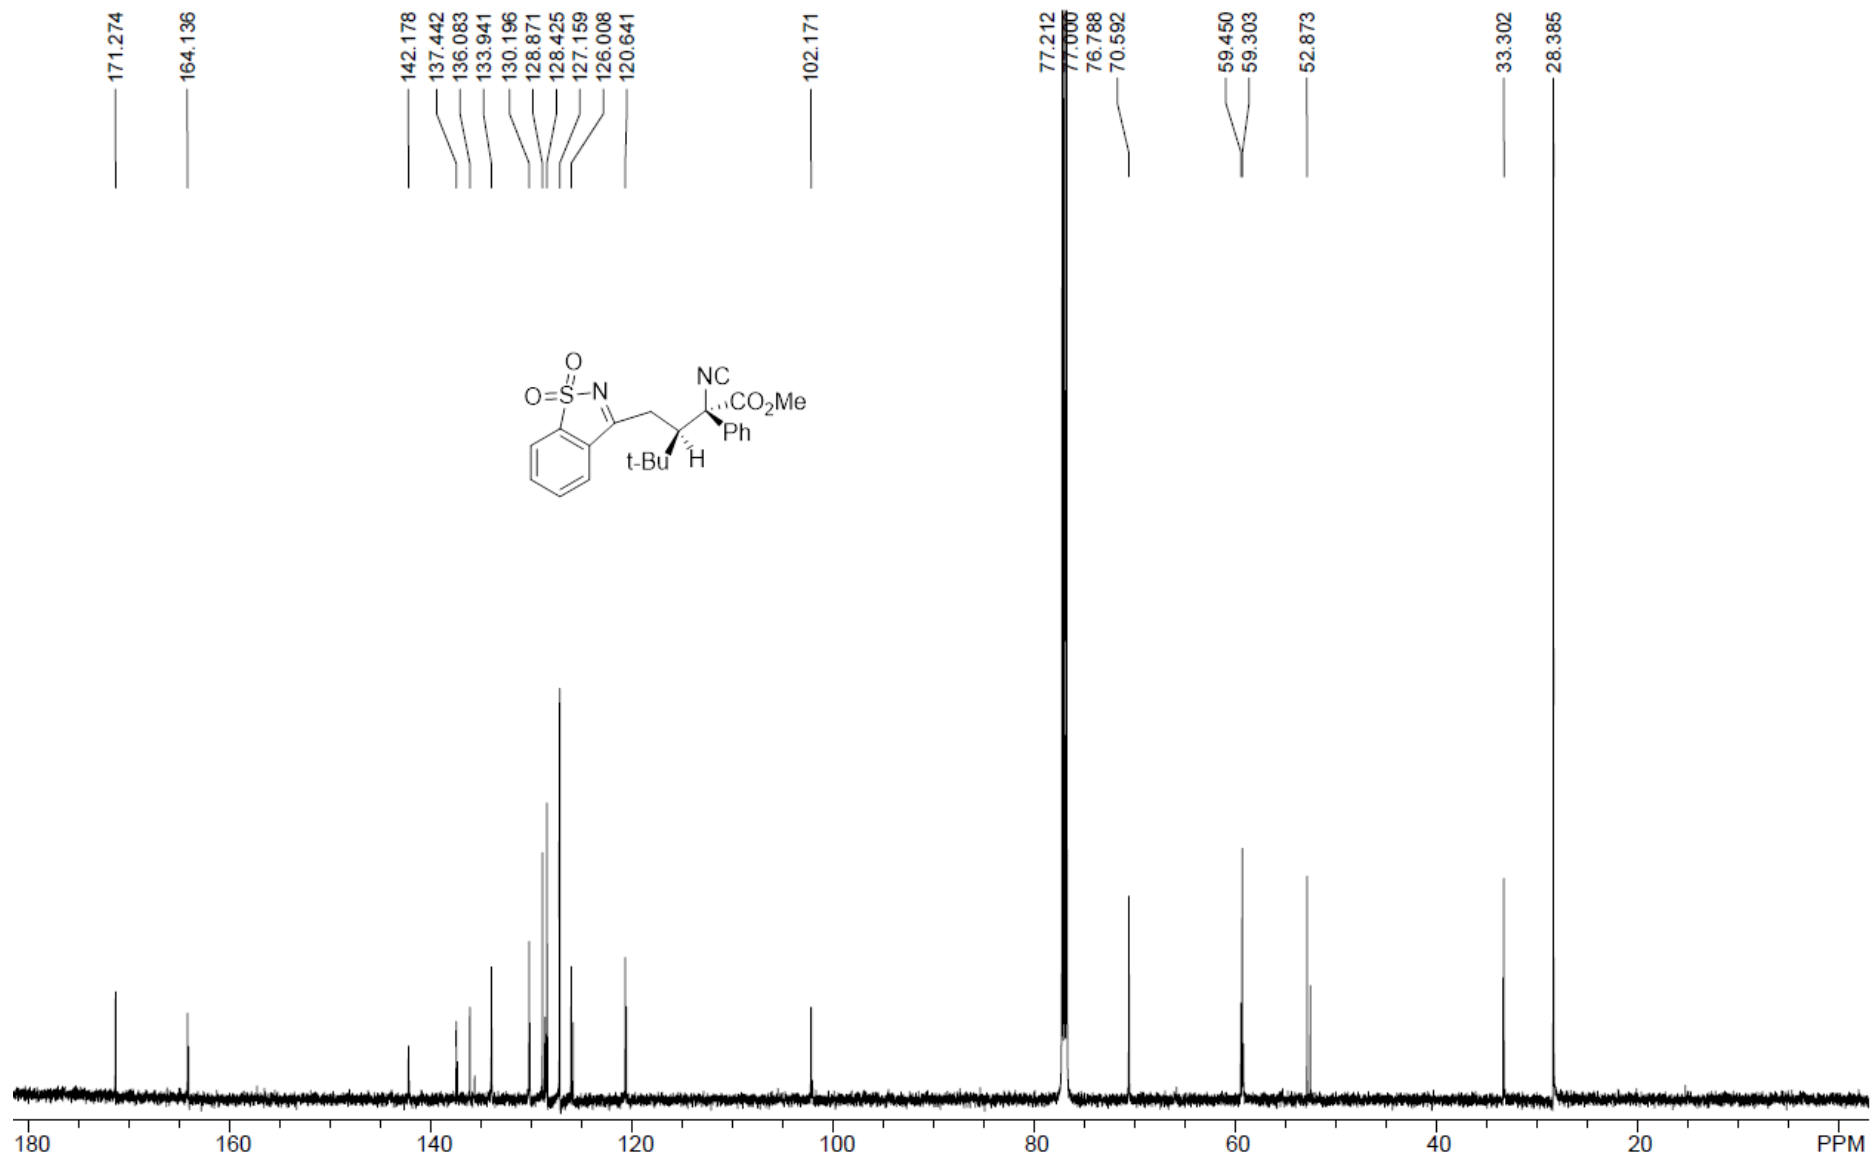

Supplement: d1ob00115a1.pdf [file d1ob00115a1.pdf]
